# Supplementary material for: Pan-cancer analysis identifies SPEN mutation as a predictive biomarker with the efficacy of immunotherapy
Source: BMC Cancer. 2023 Aug 24;23:793. doi: 10.1186/s12885-023-11235-0 (PMC10463702; doi:10.1186/s12885-023-11235-0)
Supplement: Supplementary file 2 — Additional file 2: Supplement Table 1. The frequency of SPEN mutation and median TMB, MSIsensor and MSI MANTIS scores. Supplement Table 2. Characteristics of studies included in this study. [file 12885_2023_11235_MOESM2_ESM.xlsx]

## Sheet: Table1
Table1:The frequency of SPEN mutation and median TMB, MSIsensor and MSI MANTIS scores.
Cancer Type	Alteration Frequency	Alteration Type	Alteration Count	TMB	MSIsensor scores	MSI MANTIS scores
Melanoma	13.1818	mutated	58	14.883	0.05	0.32
Endometrial Cancer	11.1498	mutated	64	2.333	0.4	0.31
Mature B-Cell Neoplasms	7.31707	mutated	3	3.6	0.075	0.32
Esophagogastric Cancer	7.28155	mutated	45	3.817	0.15	0.33
Bladder Cancer	7.07317	mutated	29	5.767	0.03	0.33
Colorectal Cancer	6.55431	mutated	35	3.5	0.35	0.34
Cervical Cancer	5.84192	mutated	17	2.833	0.06	0.31
Head and Neck Cancer	5.24272	mutated	27	3.533	0.02	0.31
Non-Small Cell Lung Cancer	4.19048	mutated	44	7.3	0.03	0.31
Ovarian Epithelial Tumor	3.63289	mutated	19	1.867	0.8	0.29
Renal Clear Cell Carcinoma	3.48259	mutated	14	1.167	0.02	0.28
Breast Cancer	3.00188	mutated	32	1.3	0.19	0.3
Renal Non-Clear Cell Carcinoma	2.6393	mutated	9	1.867	0.02	0.31
Glioblastoma	2.51889	mutated	10	1.7	0.08	0.28
Leukemia	2.5	mutated	5	0.533
Pancreatic Cancer	2.23464	mutated	4	1.167	0.6	0.29
Adrenocortical Carcinoma	2.1978	mutated	2	0.9	0.56	0.3
Hepatobiliary Cancer	2.18579	mutated	8	2.833	0.06	0.31
Prostate Cancer	1.21457	mutated	6	0.9	0	0.32
Sarcoma	1.17647	mutated	3	1.3	0.14	0.33
Non-Seminomatous Germ Cell Tumor	1.16279	mutated	1	0.417	0.24	0.33
Thymic Epithelial Tumor	0.813008	mutated	1	0.467	0	0.33
Pheochromocytoma	0.680272	mutated	1	0.3	0	0.33
Glioma	0.583658	mutated	3	0.933	0.01	0.32
Thyroid Cancer	0.408163	mutated	2	0.533	0	0.31

## Sheet: Table2
Table2: Characteristics of studies included in this study.
Patient ID	Cohort	Age at PD-1 Therapy	Gender	Response	Cancer_type	Drug type	Overall survival (mouths)	Survival status	TMB (nonsynonymous)	SPEN mutatipn （0,non-mutant;1,mutant)
Pat02	Van Allen et al.(PMID 26359337)	42	female	SD	metastatic melanoma	Anti-CTLA-4	54.4	0	5.68421	0
Pat03	Van Allen et al.(PMID 26359337)	61	female	PD	metastatic melanoma	Anti-CTLA-4	3.33333	1	9.52632	0
Pat04	Van Allen et al.(PMID 26359337)	71	male	PR	metastatic melanoma	Anti-CTLA-4	32.9	0	8.57895	0
Pat06	Van Allen et al.(PMID 26359337)	33	male	PD	metastatic melanoma	Anti-CTLA-4	5.36667	1	3.86842	0
Pat07	Van Allen et al.(PMID 26359337)	36	male	SD	metastatic melanoma	Anti-CTLA-4	35	0	3.76316	0
Pat08	Van Allen et al.(PMID 26359337)	73	male	PD	metastatic melanoma	Anti-CTLA-4	4.66667	1	6.42105	0
Pat100	Van Allen et al.(PMID 26359337)	70	male	PD	metastatic melanoma	Anti-CTLA-4	12	1	13.3158	0
Pat101	Van Allen et al.(PMID 26359337)	75	male	PD	metastatic melanoma	Anti-CTLA-4	9.6	1	1.02632	0
Pat103	Van Allen et al.(PMID 26359337)	70	male	PR	metastatic melanoma	Anti-CTLA-4	34.9333	1	14.0789	0
Pat104	Van Allen et al.(PMID 26359337)	45	female	SD	metastatic melanoma	Anti-CTLA-4	7.9	1	0.684211	0
Pat105	Van Allen et al.(PMID 26359337)	41	male	PR	metastatic melanoma	Anti-CTLA-4	34.9	0	2.78947	0
Pat106	Van Allen et al.(PMID 26359337)	43	female	PD	metastatic melanoma	Anti-CTLA-4	8.33333	1	0.473684	0
Pat109	Van Allen et al.(PMID 26359337)	69	male	PD	metastatic melanoma	Anti-CTLA-4	2.76667	1	6.28947	0
Pat11	Van Allen et al.(PMID 26359337)	67	male	PD	metastatic melanoma	Anti-CTLA-4	26.3333	0	53.1842	1
Pat110	Van Allen et al.(PMID 26359337)	76	male	PD	metastatic melanoma	Anti-CTLA-4	10.6667	1	154.053	1
Pat113	Van Allen et al.(PMID 26359337)	68	male	PR	metastatic melanoma	Anti-CTLA-4	10.0333	1	7.89474	0
Pat115	Van Allen et al.(PMID 26359337)	45	male	PD	metastatic melanoma	Anti-CTLA-4	4.83333	1	1.63158	0
Pat117	Van Allen et al.(PMID 26359337)	73	male	PR	metastatic melanoma	Anti-CTLA-4	30.4667	0	17.4211	0
Pat118	Van Allen et al.(PMID 26359337)	43	female	PD	metastatic melanoma	Anti-CTLA-4	10.4333	1	2.97368	0
Pat119	Van Allen et al.(PMID 26359337)	61	male	PD	metastatic melanoma	Anti-CTLA-4	26.9333	0	7.63158	0
Pat121	Van Allen et al.(PMID 26359337)	46	male	PD	metastatic melanoma	Anti-CTLA-4	4.06667	1	0.947368	0
Pat123	Van Allen et al.(PMID 26359337)	50	female	SD	metastatic melanoma	Anti-CTLA-4	28.4333	1	13.0526	0
Pat124	Van Allen et al.(PMID 26359337)	78	male	PD	metastatic melanoma	Anti-CTLA-4	4.86667	1	9.84211	0
Pat126	Van Allen et al.(PMID 26359337)	77	male	PR	metastatic melanoma	Anti-CTLA-4	21.3667	0	9.73684	0
Pat127	Van Allen et al.(PMID 26359337)	25	female	PD	metastatic melanoma	Anti-CTLA-4	11.0667	1	2.71053	0
Pat128	Van Allen et al.(PMID 26359337)	29	male	PD	metastatic melanoma	Anti-CTLA-4	3.76667	1	2	0
Pat129	Van Allen et al.(PMID 26359337)	18	male	PD	metastatic melanoma	Anti-CTLA-4	17.9667	0	2.34211	0
Pat13	Van Allen et al.(PMID 26359337)	78	male	PD	metastatic melanoma	Anti-CTLA-4	24.4	1	2.78947	0
Pat130	Van Allen et al.(PMID 26359337)	76	male	PD	metastatic melanoma	Anti-CTLA-4	1.5	1	4.81579	0
Pat131	Van Allen et al.(PMID 26359337)	32	male	SD	metastatic melanoma	Anti-CTLA-4	8.56667	1	2.34211	0
Pat132	Van Allen et al.(PMID 26359337)	81	male	PR	metastatic melanoma	Anti-CTLA-4	22.5333	0	51.7632	0
Pat133	Van Allen et al.(PMID 26359337)	76	male	PD	metastatic melanoma	Anti-CTLA-4	18.0667	1	5.34211	0
Pat135	Van Allen et al.(PMID 26359337)	29	female	PD	metastatic melanoma	Anti-CTLA-4	2.7	1	3.44737	0
Pat138	Van Allen et al.(PMID 26359337)	39	female	SD	metastatic melanoma	Anti-CTLA-4	49.2667	1	124.684	1
Pat139	Van Allen et al.(PMID 26359337)	58	male	PD	metastatic melanoma	Anti-CTLA-4	3.3	1	34.3684	1
Pat14	Van Allen et al.(PMID 26359337)	48	female	PD	metastatic melanoma	Anti-CTLA-4	5.43333	1	1.31579	0
Pat140	Van Allen et al.(PMID 26359337)	62	male	PD	metastatic melanoma	Anti-CTLA-4	16.4	1	6.60526	0
Pat143	Van Allen et al.(PMID 26359337)	71	male	PD	metastatic melanoma	Anti-CTLA-4	5.1	1	21.8947	0
Pat147	Van Allen et al.(PMID 26359337)	63	male	PD	metastatic melanoma	Anti-CTLA-4	7.46667	1	14.3158	0
Pat148	Van Allen et al.(PMID 26359337)	35	female	PD	metastatic melanoma	Anti-CTLA-4	2.8	1	3.34211	0
Pat15	Van Allen et al.(PMID 26359337)	32	male	PD	metastatic melanoma	Anti-CTLA-4	1.66667	1	6.23684	0
Pat151	Van Allen et al.(PMID 26359337)	68	male	PD	metastatic melanoma	Anti-CTLA-4	6.8	1	37.8684	0
Pat157	Van Allen et al.(PMID 26359337)	69	female	NA	metastatic melanoma	Anti-CTLA-4	2.86667	1	2.84211	0
Pat159	Van Allen et al.(PMID 26359337)	51	male	PD	metastatic melanoma	Anti-CTLA-4	28.0667	0	5.86842	1
Pat16	Van Allen et al.(PMID 26359337)	68	female	PD	metastatic melanoma	Anti-CTLA-4	27.0333	1	49.9211	0
Pat160	Van Allen et al.(PMID 26359337)	79	male	PD	metastatic melanoma	Anti-CTLA-4	5.06667	1	0.815789	0
Pat162	Van Allen et al.(PMID 26359337)	55	female	PD	metastatic melanoma	Anti-CTLA-4	7.03333	1	1.31579	0
Pat163	Van Allen et al.(PMID 26359337)	54	male	PD	metastatic melanoma	Anti-CTLA-4	24.9667	0	1.23684	0
Pat165	Van Allen et al.(PMID 26359337)	50	female	PD	metastatic melanoma	Anti-CTLA-4	3.83333	1	0.657895	0
Pat166	Van Allen et al.(PMID 26359337)	31	male	NA	metastatic melanoma	Anti-CTLA-4	2.56667	1	0.421053	0
Pat167	Van Allen et al.(PMID 26359337)	50	male	PD	metastatic melanoma	Anti-CTLA-4	13.6	1	0.921053	0
Pat168	Van Allen et al.(PMID 26359337)	68	male	NA	metastatic melanoma	Anti-CTLA-4	2.23333	1	5.02632	0
Pat17	Van Allen et al.(PMID 26359337)	44	male	PD	metastatic melanoma	Anti-CTLA-4	6.83333	1	5.57895	0
Pat170	Van Allen et al.(PMID 26359337)	48	male	PD	metastatic melanoma	Anti-CTLA-4	3.6	1	4.97368	0
Pat171	Van Allen et al.(PMID 26359337)	66	male	PD	metastatic melanoma	Anti-CTLA-4	15.5333	1	1.92105	0
Pat174	Van Allen et al.(PMID 26359337)	57	female	PR	metastatic melanoma	Anti-CTLA-4	22.9333	0	15.3684	0
Pat175	Van Allen et al.(PMID 26359337)	67	female	NA	metastatic melanoma	Anti-CTLA-4	3	1	2.52632	0
Pat18	Van Allen et al.(PMID 26359337)	55	female	PD	metastatic melanoma	Anti-CTLA-4	26.6	0	0.815789	0
Pat19	Van Allen et al.(PMID 26359337)	59	male	PD	metastatic melanoma	Anti-CTLA-4	5.83333	1	12.5263	0
Pat21	Van Allen et al.(PMID 26359337)	81	male	SD	metastatic melanoma	Anti-CTLA-4	22.5333	1	35.0789	0
Pat24	Van Allen et al.(PMID 26359337)	74	female	PR	metastatic melanoma	Anti-CTLA-4	32.3667	0	0.763158	0
Pat25	Van Allen et al.(PMID 26359337)	69	male	PD	metastatic melanoma	Anti-CTLA-4	10.8333	1	1.13158	0
Pat27	Van Allen et al.(PMID 26359337)	61	male	PD	metastatic melanoma	Anti-CTLA-4	45.9667	0	0.842105	0
Pat28	Van Allen et al.(PMID 26359337)	77	male	PD	metastatic melanoma	Anti-CTLA-4	39.4667	1	16.6579	0
Pat29	Van Allen et al.(PMID 26359337)	82	male	NA	metastatic melanoma	Anti-CTLA-4	44.2	0	1.07895	0
Pat32	Van Allen et al.(PMID 26359337)	72	male	PD	metastatic melanoma	Anti-CTLA-4	4.9	1	17.5526	0
Pat33	Van Allen et al.(PMID 26359337)	65	male	PD	metastatic melanoma	Anti-CTLA-4	7.03333	1	0.368421	0
Pat36	Van Allen et al.(PMID 26359337)	52	female	PD	metastatic melanoma	Anti-CTLA-4	1.8	1	0.184211	0
Pat37	Van Allen et al.(PMID 26359337)	47	female	PD	metastatic melanoma	Anti-CTLA-4	2.33333	1	3.15789	0
Pat38	Van Allen et al.(PMID 26359337)	45	male	PR	metastatic melanoma	Anti-CTLA-4	51.3	0	63.8158	0
Pat39	Van Allen et al.(PMID 26359337)	67	male	CR	metastatic melanoma	Anti-CTLA-4	49.5667	0	1.71053	0
Pat40	Van Allen et al.(PMID 26359337)	74	male	PD	metastatic melanoma	Anti-CTLA-4	1.13333	1	0.5	0
Pat41	Van Allen et al.(PMID 26359337)	64	male	PD	metastatic melanoma	Anti-CTLA-4	4.26667	1	8.68421	0
Pat43	Van Allen et al.(PMID 26359337)	75	female	PD	metastatic melanoma	Anti-CTLA-4	1.23333	1	4.65789	0
Pat44	Van Allen et al.(PMID 26359337)	57	female	PD	metastatic melanoma	Anti-CTLA-4	9.03333	1	1.36842	0
Pat45	Van Allen et al.(PMID 26359337)	68	male	PD	metastatic melanoma	Anti-CTLA-4	2.96667	1	23.8158	0
Pat46	Van Allen et al.(PMID 26359337)	36	female	PD	metastatic melanoma	Anti-CTLA-4	5.33333	1	6.63158	0
Pat47	Van Allen et al.(PMID 26359337)	78	male	CR	metastatic melanoma	Anti-CTLA-4	36.8667	0	3.55263	0
Pat49	Van Allen et al.(PMID 26359337)	36	male	SD	metastatic melanoma	Anti-CTLA-4	34.4667	0	17.3947	1
Pat50	Van Allen et al.(PMID 26359337)	77	male	PD	metastatic melanoma	Anti-CTLA-4	2.16667	1	10.8684	0
Pat54	Van Allen et al.(PMID 26359337)	73	male	PD	metastatic melanoma	Anti-CTLA-4	6.93333	1	22.6579	0
Pat55	Van Allen et al.(PMID 26359337)	71	female	PD	metastatic melanoma	Anti-CTLA-4	6.43333	1	12.3947	0
Pat56	Van Allen et al.(PMID 26359337)	68	male	PD	metastatic melanoma	Anti-CTLA-4	7.83333	1	1.13158	0
Pat57	Van Allen et al.(PMID 26359337)	69	male	PD	metastatic melanoma	Anti-CTLA-4	8.33333	1	1.44737	0
Pat58	Van Allen et al.(PMID 26359337)	59	female	PD	metastatic melanoma	Anti-CTLA-4	21.7333	1	44.3684	0
Pat59	Van Allen et al.(PMID 26359337)	36	male	PD	metastatic melanoma	Anti-CTLA-4	7.46667	1	6.94737	0
Pat60	Van Allen et al.(PMID 26359337)	86	male	PD	metastatic melanoma	Anti-CTLA-4	9.06667	1	19.6316	0
Pat62	Van Allen et al.(PMID 26359337)	76	male	PD	metastatic melanoma	Anti-CTLA-4	20.0667	1	36	0
Pat63	Van Allen et al.(PMID 26359337)	65	male	CR	metastatic melanoma	Anti-CTLA-4	34.6333	0	4.97368	0
Pat64	Van Allen et al.(PMID 26359337)	83	male	PD	metastatic melanoma	Anti-CTLA-4	3.53333	1	15.8158	0
Pat66	Van Allen et al.(PMID 26359337)	44	female	SD	metastatic melanoma	Anti-CTLA-4	21.7667	0	8.13158	0
Pat67	Van Allen et al.(PMID 26359337)	39	male	PD	metastatic melanoma	Anti-CTLA-4	2.63333	1	0.710526	0
Pat70	Van Allen et al.(PMID 26359337)	38	male	PD	metastatic melanoma	Anti-CTLA-4	17.7333	1	2.05263	0
Pat71	Van Allen et al.(PMID 26359337)	63	male	PD	metastatic melanoma	Anti-CTLA-4	4.56667	1	16.9737	0
Pat73	Van Allen et al.(PMID 26359337)	71	male	PR	metastatic melanoma	Anti-CTLA-4	14.7333	1	6.57895	0
Pat74	Van Allen et al.(PMID 26359337)	73	male	PD	metastatic melanoma	Anti-CTLA-4	6.43333	1	13.1316	0
Pat76	Van Allen et al.(PMID 26359337)	74	male	PD	metastatic melanoma	Anti-CTLA-4	4.63333	1	4.97368	0
Pat77	Van Allen et al.(PMID 26359337)	21	male	PR	metastatic melanoma	Anti-CTLA-4	34.3	0	9.18421	0
Pat78	Van Allen et al.(PMID 26359337)	71	female	PD	metastatic melanoma	Anti-CTLA-4	1.26667	1	0.394737	0
Pat79	Van Allen et al.(PMID 26359337)	69	male	PR	metastatic melanoma	Anti-CTLA-4	26.7	1	8.07895	0
Pat80	Van Allen et al.(PMID 26359337)	48	male	SD	metastatic melanoma	Anti-CTLA-4	24.1333	1	5.05263	1
Pat81	Van Allen et al.(PMID 26359337)	54	female	PD	metastatic melanoma	Anti-CTLA-4	20.9333	1	2.52632	0
Pat82	Van Allen et al.(PMID 26359337)	54	female	PD	metastatic melanoma	Anti-CTLA-4	3.46667	1	10.5263	0
Pat83	Van Allen et al.(PMID 26359337)	22	male	PD	metastatic melanoma	Anti-CTLA-4	34.2333	0	0.921053	0
Pat85	Van Allen et al.(PMID 26359337)	83	male	PD	metastatic melanoma	Anti-CTLA-4	15.2667	1	8.42105	0
Pat86	Van Allen et al.(PMID 26359337)	55	male	SD	metastatic melanoma	Anti-CTLA-4	9.76667	1	1.60526	0
Pat88	Van Allen et al.(PMID 26359337)	60	female	SD	metastatic melanoma	Anti-CTLA-4	32.9667	0	28.3421	0
Pat90	Van Allen et al.(PMID 26359337)	59	male	PR	metastatic melanoma	Anti-CTLA-4	33.5	0	5.31579	0
Pat92	Van Allen et al.(PMID 26359337)	49	male	PD	metastatic melanoma	Anti-CTLA-4	4.1	1	0.736842	0
Pat98	Van Allen et al.(PMID 26359337)	57	female	PD	metastatic melanoma	Anti-CTLA-4	4.66667	1	0.842105	0
P-0000057	Samstein et al.(PMID 30643254)	41	Female		Breast Cancer	PD-1/PDL-1	0	1	5.54578	0
P-0000062	Samstein et al.(PMID 30643254)	80	Male		Esophagogastric Cancer	PD-1/PDL-1	1	1	6.65493	0
P-0000063	Samstein et al.(PMID 30643254)	62	Male		Bladder Cancer	PD-1/PDL-1	42	0	15.5282	0
P-0000071	Samstein et al.(PMID 30643254)	66	Male		Bladder Cancer	PD-1/PDL-1	43	0	9.9824	0
P-0000082	Samstein et al.(PMID 30643254)	61	Male		Non-Small Cell Lung Cancer	PD-1/PDL-1	57	0	13.3099	0
P-0000088	Samstein et al.(PMID 30643254)	63	Male		Bladder Cancer	PD-1/PDL-1	12	1	12.2007	1
P-0000103	Samstein et al.(PMID 30643254)	47	Male		Esophagogastric Cancer	Combo	18	1	6.65493	0
P-0000121	Samstein et al.(PMID 30643254)	44	Male		Esophagogastric Cancer	PD-1/PDL-1	4	0	3.32747	0
P-0000165	Samstein et al.(PMID 30643254)	67	Female		Non-Small Cell Lung Cancer	PD-1/PDL-1	1	1	5.54578	0
P-0000184	Samstein et al.(PMID 30643254)	60	Male		Bladder Cancer	PD-1/PDL-1	8	0	8.87324	0
P-0000205	Samstein et al.(PMID 30643254)	56	Female		Non-Small Cell Lung Cancer	Combo	2	1	5.54578	0
P-0000208	Samstein et al.(PMID 30643254)	69	Female		Non-Small Cell Lung Cancer	PD-1/PDL-1	13	1	2.21831	0
P-0000222	Samstein et al.(PMID 30643254)	64	Male		Bladder Cancer	PD-1/PDL-1	8	1	13.3099	0
P-0000223	Samstein et al.(PMID 30643254)	29	Female		Glioma	PD-1/PDL-1	2	1	5.54578	0
P-0000227	Samstein et al.(PMID 30643254)	60	Female		Head and Neck Cancer	PD-1/PDL-1	7	0	0	0
P-0000235	Samstein et al.(PMID 30643254)	76	Male		Non-Small Cell Lung Cancer	PD-1/PDL-1	3	1	8.87324	0
P-0000247	Samstein et al.(PMID 30643254)	50	Female		Breast Cancer	Combo	17	0	2.21831	0
P-0000249	Samstein et al.(PMID 30643254)	61	Male		Esophagogastric Cancer	PD-1/PDL-1	3	1	1.10916	0
P-0000268	Samstein et al.(PMID 30643254)	49	Male		Bladder Cancer	PD-1/PDL-1	35	0	5.54578	0
P-0000277	Samstein et al.(PMID 30643254)	58	Female		Cancer of Unknown Primary	PD-1/PDL-1	30	1	0	0
P-0000302	Samstein et al.(PMID 30643254)	65	Male		Non-Small Cell Lung Cancer	PD-1/PDL-1	15	0	1.10916	0
P-0000350	Samstein et al.(PMID 30643254)	22	Female		Renal Cell Carcinoma	Combo	26	1	0	0
P-0000363	Samstein et al.(PMID 30643254)	71	Male		Non-Small Cell Lung Cancer	PD-1/PDL-1	2	1	12.2007	0
P-0000369	Samstein et al.(PMID 30643254)	52	Female		Esophagogastric Cancer	Combo	17	1	1.10916	0
P-0000392	Samstein et al.(PMID 30643254)	40	Female		Breast Cancer	PD-1/PDL-1	3	1	3.32747	0
P-0000422	Samstein et al.(PMID 30643254)	52	Female		Breast Cancer	CTLA4	1	1	6.65493	0
P-0000423	Samstein et al.(PMID 30643254)	61	Male		Bladder Cancer	PD-1/PDL-1	39	0	18.8556	0
P-0000444	Samstein et al.(PMID 30643254)	61	Male		Esophagogastric Cancer	PD-1/PDL-1	2	1	5.54578	0
P-0000447	Samstein et al.(PMID 30643254)	36	Female		Breast Cancer	Combo	12	1	3.32747	0
P-0000454	Samstein et al.(PMID 30643254)	71	Male		Head and Neck Cancer	PD-1/PDL-1	9	0	2.21831	1
P-0000458	Samstein et al.(PMID 30643254)	66	Male		Non-Small Cell Lung Cancer	PD-1/PDL-1	5	1	1.10916	0
P-0000535	Samstein et al.(PMID 30643254)	76	Female		Bladder Cancer	PD-1/PDL-1	21	0	26.6197	0
P-0000544	Samstein et al.(PMID 30643254)	81	Male		Bladder Cancer	PD-1/PDL-1	5	1	0	0
P-0000547	Samstein et al.(PMID 30643254)	62	Female		Breast Cancer	PD-1/PDL-1	3	1	6.65493	0
P-0000553	Samstein et al.(PMID 30643254)	51	Male		Esophagogastric Cancer	Combo	8	1	6.65493	0
P-0000563	Samstein et al.(PMID 30643254)	42	Male		Non-Small Cell Lung Cancer	PD-1/PDL-1	6	1	3.32747	0
P-0000596	Samstein et al.(PMID 30643254)	71	Male		Melanoma	CTLA4	42	0	42.1479	1
P-0000604	Samstein et al.(PMID 30643254)	59	Male		Non-Small Cell Lung Cancer	Combo	57	0	4.43662	0
P-0000621	Samstein et al.(PMID 30643254)	44	Male		Head and Neck Cancer	PD-1/PDL-1	7	1	4.43662	0
P-0000628	Samstein et al.(PMID 30643254)	52	Male		Non-Small Cell Lung Cancer	PD-1/PDL-1	2	1	4.43662	0
P-0000638	Samstein et al.(PMID 30643254)	35	Female		Breast Cancer	CTLA4	1	1	0	0
P-0000646	Samstein et al.(PMID 30643254)	79	Male		Melanoma	CTLA4	77	0	41.0387	1
P-0000670	Samstein et al.(PMID 30643254)	50	Female		Non-Small Cell Lung Cancer	Combo	17	0	6.65493	0
P-0000681	Samstein et al.(PMID 30643254)	67	Female		Non-Small Cell Lung Cancer	PD-1/PDL-1	28	0	18.8556	0
P-0000682	Samstein et al.(PMID 30643254)	62	Male		Colorectal Cancer	PD-1/PDL-1	17	0	13.3099	0
P-0000686	Samstein et al.(PMID 30643254)	78	Male		Melanoma	CTLA4	80	0	179.683	0
P-0000697	Samstein et al.(PMID 30643254)	75	Female		Melanoma	Combo	32	1	7.76409	0
P-0000699	Samstein et al.(PMID 30643254)	43	Male		Colorectal Cancer	Combo	3	0	5.54578	0
P-0000702	Samstein et al.(PMID 30643254)	85	Female		Non-Small Cell Lung Cancer	PD-1/PDL-1	2	0	6.65493	0
P-0000704	Samstein et al.(PMID 30643254)	49	Female		Breast Cancer	CTLA4	1	1	9.9824	0
P-0000721	Samstein et al.(PMID 30643254)	59	Female		Colorectal Cancer	PD-1/PDL-1	4	1	7.76409	0
P-0000731	Samstein et al.(PMID 30643254)	73	Female		Non-Small Cell Lung Cancer	PD-1/PDL-1	42	0	6.65493	0
P-0000739	Samstein et al.(PMID 30643254)	79	Male		Colorectal Cancer	PD-1/PDL-1	31	1	7.76409	0
P-0000740	Samstein et al.(PMID 30643254)	69	Female		Renal Cell Carcinoma	PD-1/PDL-1	24	0	5.54578	0
P-0000746	Samstein et al.(PMID 30643254)	72	Male		Bladder Cancer	PD-1/PDL-1	6	1	14.419	0
P-0000749	Samstein et al.(PMID 30643254)	28	Male		Glioma	PD-1/PDL-1	13	0	8.87324	0
P-0000758	Samstein et al.(PMID 30643254)	52	Male		Glioma	PD-1/PDL-1	14	1	3.32747	0
P-0000762	Samstein et al.(PMID 30643254)	67	Male		Colorectal Cancer	PD-1/PDL-1	17	1	4.43662	0
P-0000768	Samstein et al.(PMID 30643254)	58	Male		Head and Neck Cancer	PD-1/PDL-1	35	1	4.43662	0
P-0000793	Samstein et al.(PMID 30643254)	54	Male		Esophagogastric Cancer	PD-1/PDL-1	5	1	3.91488	0
P-0000818	Samstein et al.(PMID 30643254)	33	Male		Glioma	PD-1/PDL-1	14	1	4.43662	0
P-0000867	Samstein et al.(PMID 30643254)	66	Male		Non-Small Cell Lung Cancer	PD-1/PDL-1	0	1	6.65493	0
P-0000872	Samstein et al.(PMID 30643254)	78	Male		Bladder Cancer	PD-1/PDL-1	10	1	0	0
P-0000880	Samstein et al.(PMID 30643254)	66	Female		Bladder Cancer	PD-1/PDL-1	0	1	7.76409	0
P-0000891	Samstein et al.(PMID 30643254)	80	Male		Bladder Cancer	PD-1/PDL-1	11	1	11.0916	0
P-0000893	Samstein et al.(PMID 30643254)	90	Male		Melanoma	CTLA4	16	1	6.65493	0
P-0000894	Samstein et al.(PMID 30643254)	80	Male		Non-Small Cell Lung Cancer	PD-1/PDL-1	57	0	5.54578	0
P-0000895	Samstein et al.(PMID 30643254)	67	Male		Melanoma	Combo	33	1	6.65493	0
P-0000898	Samstein et al.(PMID 30643254)	54	Male		Melanoma	CTLA4	21	1	5.54578	0
P-0000922	Samstein et al.(PMID 30643254)	51	Male		Melanoma	CTLA4	17	1	4.43662	0
P-0000938	Samstein et al.(PMID 30643254)	70	Male		Esophagogastric Cancer	Combo	13	1	3.32747	0
P-0000940	Samstein et al.(PMID 30643254)	67	Female		Colorectal Cancer	PD-1/PDL-1	10	1	9.9824	0
P-0000958	Samstein et al.(PMID 30643254)	16	Female		Melanoma	CTLA4	35	0	2.21831	0
P-0000968	Samstein et al.(PMID 30643254)	70	Male		Melanoma	Combo	48	0	3.32747	0
P-0000977	Samstein et al.(PMID 30643254)	65	Male		Esophagogastric Cancer	Combo	2	1	7.76409	1
P-0000978	Samstein et al.(PMID 30643254)	58	Female		Non-Small Cell Lung Cancer	PD-1/PDL-1	7	1	1.10916	0
P-0001029	Samstein et al.(PMID 30643254)	56	Male		Melanoma	CTLA4	30	1	2.21831	0
P-0001052	Samstein et al.(PMID 30643254)	63	Female		Glioma	PD-1/PDL-1	8	1	3.32747	0
P-0001074	Samstein et al.(PMID 30643254)	60	Male		Bladder Cancer	PD-1/PDL-1	19	1	21.074	0
P-0001081	Samstein et al.(PMID 30643254)	52	Female		Melanoma	CTLA4	45	0	45.4754	0
P-0001093	Samstein et al.(PMID 30643254)	65	Male		Non-Small Cell Lung Cancer	Combo	42	0	12.2007	0
P-0001121	Samstein et al.(PMID 30643254)	45	Female		Non-Small Cell Lung Cancer	PD-1/PDL-1	10	1	1.10916	0
P-0001135	Samstein et al.(PMID 30643254)	58	Male		Bladder Cancer	PD-1/PDL-1	27	1	4.43662	0
P-0001144	Samstein et al.(PMID 30643254)	64	Male		Non-Small Cell Lung Cancer	PD-1/PDL-1	2	1	7.76409	0
P-0001170	Samstein et al.(PMID 30643254)	65	Male		Colorectal Cancer	PD-1/PDL-1	13	1	8.87324	0
P-0001171	Samstein et al.(PMID 30643254)	52	Male		Non-Small Cell Lung Cancer	PD-1/PDL-1	29	0	96.4965	0
P-0001174	Samstein et al.(PMID 30643254)	77	Female		Melanoma	CTLA4	70	0	1.10916	0
P-0001179	Samstein et al.(PMID 30643254)	50	Female		Melanoma	PD-1/PDL-1	6	1	3.32747	0
P-0001186	Samstein et al.(PMID 30643254)	69	Male		Head and Neck Cancer	PD-1/PDL-1	6	1	1.10916	0
P-0001199	Samstein et al.(PMID 30643254)	76	Female		Non-Small Cell Lung Cancer	PD-1/PDL-1	2	1	14.419	0
P-0001223	Samstein et al.(PMID 30643254)	63	Male		Bladder Cancer	Combo	3	1	7.76409	1
P-0001232	Samstein et al.(PMID 30643254)	62	Male		Renal Cell Carcinoma	PD-1/PDL-1	23	0	4.43662	0
P-0001260	Samstein et al.(PMID 30643254)	23	Female		Esophagogastric Cancer	PD-1/PDL-1	1	1	3.32747	0
P-0001268	Samstein et al.(PMID 30643254)	62	Male		Bladder Cancer	PD-1/PDL-1	9	1	4.43662	0
P-0001296	Samstein et al.(PMID 30643254)	70	Female		Non-Small Cell Lung Cancer	PD-1/PDL-1	2	1	3.32747	0
P-0001298	Samstein et al.(PMID 30643254)	59	Male		Esophagogastric Cancer	PD-1/PDL-1	9	1	5.54578	0
P-0001312	Samstein et al.(PMID 30643254)	58	Female		Breast Cancer	PD-1/PDL-1	3	1	2.21831	0
P-0001314	Samstein et al.(PMID 30643254)	44	Female		Non-Small Cell Lung Cancer	PD-1/PDL-1	1	1	2.21831	0
P-0001361	Samstein et al.(PMID 30643254)	73	Male		Melanoma	CTLA4	42	1	34.3838	0
P-0001365	Samstein et al.(PMID 30643254)	70	Male		Non-Small Cell Lung Cancer	PD-1/PDL-1	2	1	5.54578	0
P-0001371	Samstein et al.(PMID 30643254)	46	Male		Colorectal Cancer	PD-1/PDL-1	10	1	0	0
P-0001385	Samstein et al.(PMID 30643254)	51	Female		Non-Small Cell Lung Cancer	Combo	40	0	14.419	0
P-0001388	Samstein et al.(PMID 30643254)	77	Male		Glioma	PD-1/PDL-1	16	1	5.54578	0
P-0001400	Samstein et al.(PMID 30643254)	34	Female		Glioma	PD-1/PDL-1	3	1	5.54578	0
P-0001406	Samstein et al.(PMID 30643254)	65	Female		Glioma	PD-1/PDL-1	3	1	2.21831	0
P-0001408	Samstein et al.(PMID 30643254)	55	Male		Glioma	Combo	4	0	3.32747	0
P-0001420	Samstein et al.(PMID 30643254)	57	Female		Glioma	PD-1/PDL-1	4	1	38.8204	0
P-0001437	Samstein et al.(PMID 30643254)	65	Female		Non-Small Cell Lung Cancer	PD-1/PDL-1	4	1	1.10916	0
P-0001485	Samstein et al.(PMID 30643254)	71	Male		Melanoma	CTLA4	7	1	74.3134	0
P-0001495	Samstein et al.(PMID 30643254)	56	Male		Esophagogastric Cancer	PD-1/PDL-1	17	1	6.65493	0
P-0001531	Samstein et al.(PMID 30643254)	40	Male		Colorectal Cancer	PD-1/PDL-1	12	0	4.43662	0
P-0001538	Samstein et al.(PMID 30643254)	54	Male		Head and Neck Cancer	PD-1/PDL-1	6	1	4.43662	0
P-0001543	Samstein et al.(PMID 30643254)	50	Male		Esophagogastric Cancer	Combo	15	1	4.43662	0
P-0001560	Samstein et al.(PMID 30643254)	65	Male		Melanoma	CTLA4	43	0	24.4014	0
P-0001578	Samstein et al.(PMID 30643254)	78	Male		Bladder Cancer	PD-1/PDL-1	3	1	11.0916	0
P-0001586	Samstein et al.(PMID 30643254)	58	Male		Esophagogastric Cancer	PD-1/PDL-1	11	0	5.87232	0
P-0001591	Samstein et al.(PMID 30643254)	17	Male		Glioma	PD-1/PDL-1	15	1	2.21831	0
P-0001598	Samstein et al.(PMID 30643254)	76	Male		Head and Neck Cancer	PD-1/PDL-1	34	0	11.0916	0
P-0001603	Samstein et al.(PMID 30643254)	61	Male		Melanoma	CTLA4	40	0	22.1831	0
P-0001621	Samstein et al.(PMID 30643254)	37	Female		Head and Neck Cancer	Combo	0	1	2.21831	0
P-0001633	Samstein et al.(PMID 30643254)	55	Female		Non-Small Cell Lung Cancer	PD-1/PDL-1	1	1	4.43662	0
P-0001646	Samstein et al.(PMID 30643254)	61	Female		Melanoma	CTLA4	10	1	1.10916	0
P-0001665	Samstein et al.(PMID 30643254)	48	Female		Non-Small Cell Lung Cancer	PD-1/PDL-1	5	1	1.10916	0
P-0001669	Samstein et al.(PMID 30643254)	60	Male		Melanoma	CTLA4	5	1	1.10916	0
P-0001679	Samstein et al.(PMID 30643254)	69	Male		Melanoma	CTLA4	4	1	5.54578	0
P-0001693	Samstein et al.(PMID 30643254)	53	Female		Colorectal Cancer	PD-1/PDL-1	2	1	9.9824	0
P-0001702	Samstein et al.(PMID 30643254)	48	Female		Colorectal Cancer	PD-1/PDL-1	9	1	5.54578	0
P-0001706	Samstein et al.(PMID 30643254)	45	Male		Melanoma	PD-1/PDL-1	15	1	22.1831	0
P-0001710	Samstein et al.(PMID 30643254)	64	Male		Melanoma	CTLA4	40	0	16.6373	0
P-0001731	Samstein et al.(PMID 30643254)	26	Male		Glioma	PD-1/PDL-1	31	1	5.54578	0
P-0001733	Samstein et al.(PMID 30643254)	70	Male		Esophagogastric Cancer	Combo	13	0	4.43662	0
P-0001738	Samstein et al.(PMID 30643254)	24	Male		Renal Cell Carcinoma	PD-1/PDL-1	0	1	1.10916	0
P-0001756	Samstein et al.(PMID 30643254)	74	Male		Melanoma	CTLA4	40	0	44.3662	0
P-0001771	Samstein et al.(PMID 30643254)	44	Female		Colorectal Cancer	PD-1/PDL-1	10	1	4.43662	0
P-0001785	Samstein et al.(PMID 30643254)	43	Female		Breast Cancer	PD-1/PDL-1	13	0	2.21831	0
P-0001794	Samstein et al.(PMID 30643254)	63	Male		Head and Neck Cancer	PD-1/PDL-1	4	1	3.32747	0
P-0001807	Samstein et al.(PMID 30643254)	71	Male		Colorectal Cancer	PD-1/PDL-1	2	1	5.54578	0
P-0001808	Samstein et al.(PMID 30643254)	58	Male		Colorectal Cancer	PD-1/PDL-1	10	0	176.356	1
P-0001832	Samstein et al.(PMID 30643254)	68	Female		Non-Small Cell Lung Cancer	PD-1/PDL-1	3	1	4.43662	0
P-0001836	Samstein et al.(PMID 30643254)	60	Female		Non-Small Cell Lung Cancer	PD-1/PDL-1	6	0	25.5106	0
P-0001841	Samstein et al.(PMID 30643254)	62	Male		Melanoma	Combo	3	1	7.76409	0
P-0001843	Samstein et al.(PMID 30643254)	63	Female		Glioma	PD-1/PDL-1	7	0	4.43662	0
P-0001850	Samstein et al.(PMID 30643254)	71	Male		Esophagogastric Cancer	PD-1/PDL-1	17	0	1.10916	0
P-0001855	Samstein et al.(PMID 30643254)	64	Male		Esophagogastric Cancer	Combo	9	0	4.43662	0
P-0001867	Samstein et al.(PMID 30643254)	70	Male		Colorectal Cancer	PD-1/PDL-1	9	1	14.419	0
P-0001871	Samstein et al.(PMID 30643254)	60	Female		Bladder Cancer	PD-1/PDL-1	2	1	5.54578	0
P-0001882	Samstein et al.(PMID 30643254)	55	Male		Glioma	PD-1/PDL-1	23	0	34.3838	0
P-0001892	Samstein et al.(PMID 30643254)	86	Male		Melanoma	CTLA4	4	1	4.43662	0
P-0001904	Samstein et al.(PMID 30643254)	72	Female		Bladder Cancer	PD-1/PDL-1	1	1	5.54578	0
P-0001955	Samstein et al.(PMID 30643254)	31	Female		Non-Small Cell Lung Cancer	PD-1/PDL-1	6	1	2.21831	0
P-0001977	Samstein et al.(PMID 30643254)	80	Male		Non-Small Cell Lung Cancer	PD-1/PDL-1	4	1	9.9824	0
P-0002015	Samstein et al.(PMID 30643254)	44	Female		Glioma	PD-1/PDL-1	8	1	1.10916	0
P-0002018	Samstein et al.(PMID 30643254)	36	Female		Melanoma	Combo	4	1	4.43662	0
P-0002019	Samstein et al.(PMID 30643254)	80	Male		Melanoma	PD-1/PDL-1	7	0	1.10916	0
P-0002028	Samstein et al.(PMID 30643254)	65	Female		Non-Small Cell Lung Cancer	PD-1/PDL-1	33	0	6.65493	0
P-0002041	Samstein et al.(PMID 30643254)	62	Female		Breast Cancer	PD-1/PDL-1	4	1	0	0
P-0002042	Samstein et al.(PMID 30643254)	47	Male		Colorectal Cancer	PD-1/PDL-1	7	1	11.0916	0
P-0002049	Samstein et al.(PMID 30643254)	33	Female		Colorectal Cancer	PD-1/PDL-1	39	0	54.3486	0
P-0002151	Samstein et al.(PMID 30643254)	71	Female		Non-Small Cell Lung Cancer	PD-1/PDL-1	25	0	9.9824	0
P-0002157	Samstein et al.(PMID 30643254)	81	Female		Melanoma	PD-1/PDL-1	0	0	23.2923	0
P-0002160	Samstein et al.(PMID 30643254)	67	Male		Non-Small Cell Lung Cancer	PD-1/PDL-1	6	1	13.3099	0
P-0002165	Samstein et al.(PMID 30643254)	63	Male		Melanoma	Combo	22	0	2.21831	0
P-0002181	Samstein et al.(PMID 30643254)	48	Male		Glioma	PD-1/PDL-1	9	1	2.21831	0
P-0002182	Samstein et al.(PMID 30643254)	71	Female		Melanoma	Combo	22	1	0	0
P-0002185	Samstein et al.(PMID 30643254)	51	Male		Head and Neck Cancer	PD-1/PDL-1	10	1	5.54578	0
P-0002193	Samstein et al.(PMID 30643254)	63	Male		Head and Neck Cancer	PD-1/PDL-1	11	1	0	0
P-0002225	Samstein et al.(PMID 30643254)	72	Male		Non-Small Cell Lung Cancer	PD-1/PDL-1	17	1	1.10916	0
P-0002247	Samstein et al.(PMID 30643254)	69	Female		Non-Small Cell Lung Cancer	PD-1/PDL-1	19	1	21.074	0
P-0002255	Samstein et al.(PMID 30643254)	63	Female		Renal Cell Carcinoma	PD-1/PDL-1	39	0	3.32747	0
P-0002265	Samstein et al.(PMID 30643254)	68	Male		Glioma	PD-1/PDL-1	21	0	1.10916	0
P-0002270	Samstein et al.(PMID 30643254)	33	Male		Renal Cell Carcinoma	PD-1/PDL-1	16	0	4.43662	0
P-0002279	Samstein et al.(PMID 30643254)	70	Female		Non-Small Cell Lung Cancer	PD-1/PDL-1	3	1	7.76409	0
P-0002292	Samstein et al.(PMID 30643254)	70	Male		Bladder Cancer	PD-1/PDL-1	15	1	13.3099	0
P-0002295	Samstein et al.(PMID 30643254)	77	Female		Non-Small Cell Lung Cancer	PD-1/PDL-1	25	1	4.43662	0
P-0002305	Samstein et al.(PMID 30643254)	80	Male		Melanoma	CTLA4	14	0	9.9824	0
P-0002311	Samstein et al.(PMID 30643254)	59	Male		Bladder Cancer	Combo	39	0	17.7465	0
P-0002320	Samstein et al.(PMID 30643254)	57	Male		Non-Small Cell Lung Cancer	PD-1/PDL-1	8	1	6.65493	0
P-0002332	Samstein et al.(PMID 30643254)	76	Female		Cancer of Unknown Primary	PD-1/PDL-1	10	1	4.43662	0
P-0002351	Samstein et al.(PMID 30643254)	73	Female		Non-Small Cell Lung Cancer	PD-1/PDL-1	11	1	7.76409	0
P-0002353	Samstein et al.(PMID 30643254)	47	Female		Melanoma	CTLA4	21	1	18.8556	0
P-0002380	Samstein et al.(PMID 30643254)	51	Female		Melanoma	Combo	32	0	9.9824	0
P-0002386	Samstein et al.(PMID 30643254)	33	Female		Glioma	PD-1/PDL-1	12	1	5.54578	0
P-0002392	Samstein et al.(PMID 30643254)	53	Male		Melanoma	CTLA4	39	0	34.3838	0
P-0002404	Samstein et al.(PMID 30643254)	72	Male		Bladder Cancer	PD-1/PDL-1	1	1	3.32747	0
P-0002418	Samstein et al.(PMID 30643254)	30	Female		Melanoma	CTLA4	31	0	3.32747	0
P-0002422	Samstein et al.(PMID 30643254)	76	Female		Melanoma	PD-1/PDL-1	6	1	2.21831	0
P-0002429	Samstein et al.(PMID 30643254)	65	Male		Melanoma	CTLA4	7	1	4.43662	0
P-0002444	Samstein et al.(PMID 30643254)	67	Male		Non-Small Cell Lung Cancer	PD-1/PDL-1	13	1	17.7465	0
P-0002452	Samstein et al.(PMID 30643254)	57	Female		Glioma	PD-1/PDL-1	6	1	1.10916	0
P-0002456	Samstein et al.(PMID 30643254)	74	Female		Melanoma	CTLA4	1	1	7.76409	0
P-0002465	Samstein et al.(PMID 30643254)	43	Male		Esophagogastric Cancer	Combo	4	1	12.2007	0
P-0002469	Samstein et al.(PMID 30643254)	55	Male		Head and Neck Cancer	PD-1/PDL-1	8	1	3.32747	0
P-0002472	Samstein et al.(PMID 30643254)	56	Male		Bladder Cancer	PD-1/PDL-1	18	1	2.21831	0
P-0002483	Samstein et al.(PMID 30643254)	67	Female		Renal Cell Carcinoma	PD-1/PDL-1	14	1	5.54578	0
P-0002485	Samstein et al.(PMID 30643254)	45	Male		Non-Small Cell Lung Cancer	PD-1/PDL-1	24	1	3.32747	0
P-0002490	Samstein et al.(PMID 30643254)	72	Male		Melanoma	Combo	41	1	124.225	1
P-0002504	Samstein et al.(PMID 30643254)	67	Male		Melanoma	CTLA4	28	1	36.6021	0
P-0002507	Samstein et al.(PMID 30643254)	43	Female		Melanoma	PD-1/PDL-1	10	1	5.54578	0
P-0002517	Samstein et al.(PMID 30643254)	74	Male		Melanoma	CTLA4	19	1	2.21831	0
P-0002546	Samstein et al.(PMID 30643254)	68	Male		Non-Small Cell Lung Cancer	Combo	25	1	3.32747	0
P-0002551	Samstein et al.(PMID 30643254)	67	Female		Non-Small Cell Lung Cancer	PD-1/PDL-1	6	0	17.7465	0
P-0002559	Samstein et al.(PMID 30643254)	39	Female		Non-Small Cell Lung Cancer	PD-1/PDL-1	43	0	1.10916	0
P-0002568	Samstein et al.(PMID 30643254)	84	Male		Bladder Cancer	PD-1/PDL-1	39	0	2.21831	0
P-0002575	Samstein et al.(PMID 30643254)	69	Male		Bladder Cancer	Combo	8	1	6.65493	0
P-0002576	Samstein et al.(PMID 30643254)	78	Male		Bladder Cancer	PD-1/PDL-1	22	1	2.93616	0
P-0002603	Samstein et al.(PMID 30643254)	76	Male		Head and Neck Cancer	PD-1/PDL-1	6	0	1.10916	0
P-0002614	Samstein et al.(PMID 30643254)	58	Male		Bladder Cancer	PD-1/PDL-1	2	1	7.76409	0
P-0002615	Samstein et al.(PMID 30643254)	57	Female		Renal Cell Carcinoma	Combo	46	0	4.43662	0
P-0002620	Samstein et al.(PMID 30643254)	19	Male		Glioma	PD-1/PDL-1	11	1	6.65493	0
P-0002626	Samstein et al.(PMID 30643254)	59	Female		Breast Cancer	CTLA4	60	0	0	0
P-0002633	Samstein et al.(PMID 30643254)	49	Male		Glioma	Combo	21	1	22.1831	0
P-0002637	Samstein et al.(PMID 30643254)	54	Male		Non-Small Cell Lung Cancer	Combo	37	0	18.8556	0
P-0002639	Samstein et al.(PMID 30643254)	67	Female		Non-Small Cell Lung Cancer	PD-1/PDL-1	11	0	12.2007	0
P-0002646	Samstein et al.(PMID 30643254)	43	Male		Non-Small Cell Lung Cancer	PD-1/PDL-1	4	1	6.65493	0
P-0002647	Samstein et al.(PMID 30643254)	42	Male		Glioma	PD-1/PDL-1	4	1	3.32747	0
P-0002653	Samstein et al.(PMID 30643254)	19	Female		Colorectal Cancer	PD-1/PDL-1	3	1	2.21831	0
P-0002668	Samstein et al.(PMID 30643254)	74	Male		Bladder Cancer	PD-1/PDL-1	41	0	9.9824	0
P-0002706	Samstein et al.(PMID 30643254)	71	Female		Melanoma	CTLA4	32	1	17.7465	0
P-0002715	Samstein et al.(PMID 30643254)	67	Male		Bladder Cancer	PD-1/PDL-1	40	0	15.5282	1
P-0002730	Samstein et al.(PMID 30643254)	50	Male		Colorectal Cancer	PD-1/PDL-1	6	1	4.43662	0
P-0002731	Samstein et al.(PMID 30643254)	64	Female		Non-Small Cell Lung Cancer	PD-1/PDL-1	25	0	9.7872	0
P-0002738	Samstein et al.(PMID 30643254)	32	Female		Non-Small Cell Lung Cancer	PD-1/PDL-1	1	1	7.76409	0
P-0002745	Samstein et al.(PMID 30643254)	55	Female		Head and Neck Cancer	PD-1/PDL-1	2	1	2.21831	0
P-0002748	Samstein et al.(PMID 30643254)	60	Male		Bladder Cancer	PD-1/PDL-1	4	1	16.6382	0
P-0002751	Samstein et al.(PMID 30643254)	69	Female		Non-Small Cell Lung Cancer	PD-1/PDL-1	11	1	2.21831	0
P-0002758	Samstein et al.(PMID 30643254)	63	Male		Non-Small Cell Lung Cancer	PD-1/PDL-1	2	1	35.493	0
P-0002765	Samstein et al.(PMID 30643254)	53	Male		Melanoma	CTLA4	7	1	5.54578	0
P-0002766	Samstein et al.(PMID 30643254)	66	Female		Non-Small Cell Lung Cancer	PD-1/PDL-1	6	1	6.65493	0
P-0002787	Samstein et al.(PMID 30643254)	63	Male		Head and Neck Cancer	PD-1/PDL-1	6	0	5.54578	0
P-0002789	Samstein et al.(PMID 30643254)	43	Female		Breast Cancer	CTLA4	9	1	2.21831	0
P-0002792	Samstein et al.(PMID 30643254)	58	Male		Colorectal Cancer	PD-1/PDL-1	8	0	5.54578	0
P-0002794	Samstein et al.(PMID 30643254)	61	Female		Non-Small Cell Lung Cancer	PD-1/PDL-1	25	0	0	0
P-0002806	Samstein et al.(PMID 30643254)	82	Male		Non-Small Cell Lung Cancer	PD-1/PDL-1	46	0	4.43662	0
P-0002818	Samstein et al.(PMID 30643254)	70	Female		Head and Neck Cancer	PD-1/PDL-1	15	0	19.9648	1
P-0002820	Samstein et al.(PMID 30643254)	50	Female		Renal Cell Carcinoma	PD-1/PDL-1	38	0	4.43662	0
P-0002826	Samstein et al.(PMID 30643254)	61	Female		Non-Small Cell Lung Cancer	PD-1/PDL-1	4	1	14.419	0
P-0002836	Samstein et al.(PMID 30643254)	55	Female		Glioma	PD-1/PDL-1	1	1	4.43662	0
P-0002855	Samstein et al.(PMID 30643254)	45	Female		Colorectal Cancer	Combo	2	1	5.54578	0
P-0002864	Samstein et al.(PMID 30643254)	65	Male		Renal Cell Carcinoma	Combo	13	1	3.32747	0
P-0002874	Samstein et al.(PMID 30643254)	55	Female		Non-Small Cell Lung Cancer	PD-1/PDL-1	3	1	14.419	0
P-0002890	Samstein et al.(PMID 30643254)	40	Female		Non-Small Cell Lung Cancer	PD-1/PDL-1	0	1	6.65493	0
P-0002905	Samstein et al.(PMID 30643254)	73	Male		Non-Small Cell Lung Cancer	PD-1/PDL-1	6	1	5.54578	0
P-0002914	Samstein et al.(PMID 30643254)	65	Male		Melanoma	Combo	24	1	24.4014	0
P-0002917	Samstein et al.(PMID 30643254)	51	Female		Non-Small Cell Lung Cancer	PD-1/PDL-1	30	0	6.65493	0
P-0002921	Samstein et al.(PMID 30643254)	73	Female		Non-Small Cell Lung Cancer	PD-1/PDL-1	12	1	14.419	0
P-0002939	Samstein et al.(PMID 30643254)	35	Male		Head and Neck Cancer	PD-1/PDL-1	10	1	1.10916	0
P-0002940	Samstein et al.(PMID 30643254)	52	Male		Renal Cell Carcinoma	PD-1/PDL-1	17	0	2.21831	0
P-0002941	Samstein et al.(PMID 30643254)	50	Male		Renal Cell Carcinoma	PD-1/PDL-1	11	1	2.21831	0
P-0002965	Samstein et al.(PMID 30643254)	56	Male		Non-Small Cell Lung Cancer	PD-1/PDL-1	11	1	7.76409	0
P-0002969	Samstein et al.(PMID 30643254)	56	Male		Non-Small Cell Lung Cancer	PD-1/PDL-1	2	1	22.1831	1
P-0002976	Samstein et al.(PMID 30643254)	77	Male		Renal Cell Carcinoma	PD-1/PDL-1	21	1	2.21831	0
P-0002981	Samstein et al.(PMID 30643254)	51	Female		Glioma	PD-1/PDL-1	12	1	0	0
P-0002993	Samstein et al.(PMID 30643254)	78	Male		Melanoma	CTLA4	59	1	4.43662	0
P-0003000	Samstein et al.(PMID 30643254)	69	Male		Bladder Cancer	PD-1/PDL-1	3	1	5.54578	0
P-0003003	Samstein et al.(PMID 30643254)	61	Male		Renal Cell Carcinoma	PD-1/PDL-1	22	0	4.43662	0
P-0003009	Samstein et al.(PMID 30643254)	52	Female		Head and Neck Cancer	Combo	28	1	8.87324	0
P-0003024	Samstein et al.(PMID 30643254)	74	Male		Bladder Cancer	Combo	2	1	33.2747	0
P-0003034	Samstein et al.(PMID 30643254)	80	Male		Non-Small Cell Lung Cancer	PD-1/PDL-1	5	1	13.7021	0
P-0003051	Samstein et al.(PMID 30643254)	46	Male		Bladder Cancer	Combo	7	1	9.7872	0
P-0003059	Samstein et al.(PMID 30643254)	40	Female		Head and Neck Cancer	PD-1/PDL-1	10	1	1.95744	1
P-0003069	Samstein et al.(PMID 30643254)	75	Female		Melanoma	CTLA4	7	1	34.2552	0
P-0003097	Samstein et al.(PMID 30643254)	82	Female		Bladder Cancer	PD-1/PDL-1	13	1	5.87232	0
P-0003117	Samstein et al.(PMID 30643254)	54	Female		Renal Cell Carcinoma	PD-1/PDL-1	13	1	4.8936	0
P-0003119	Samstein et al.(PMID 30643254)	53	Male		Non-Small Cell Lung Cancer	PD-1/PDL-1	28	0	12.7234	0
P-0003131	Samstein et al.(PMID 30643254)	59	Male		Bladder Cancer	PD-1/PDL-1	28	0	6.85104	0
P-0003132	Samstein et al.(PMID 30643254)	67	Female		Non-Small Cell Lung Cancer	PD-1/PDL-1	7	1	33.2765	0
P-0003157	Samstein et al.(PMID 30643254)	63	Male		Non-Small Cell Lung Cancer	PD-1/PDL-1	3	1	5.87232	0
P-0003197	Samstein et al.(PMID 30643254)	55	Male		Melanoma	CTLA4	2	1	1.95744	0
P-0003224	Samstein et al.(PMID 30643254)	60	Female		Breast Cancer	CTLA4	28	0	14.6808	0
P-0003225	Samstein et al.(PMID 30643254)	82	Female		Melanoma	Combo	37	0	7.82976	0
P-0003229	Samstein et al.(PMID 30643254)	61	Male		Non-Small Cell Lung Cancer	PD-1/PDL-1	21	1	49.9147	0
P-0003241	Samstein et al.(PMID 30643254)	49	Female		Breast Cancer	Combo	2	1	2.93616	0
P-0003255	Samstein et al.(PMID 30643254)	69	Male		Melanoma	Combo	2	1	9.7872	0
P-0003265	Samstein et al.(PMID 30643254)	58	Female		Breast Cancer	CTLA4	19	1	3.91488	0
P-0003272	Samstein et al.(PMID 30643254)	29	Male		Head and Neck Cancer	PD-1/PDL-1	8	1	0.97872	0
P-0003273	Samstein et al.(PMID 30643254)	39	Female		Breast Cancer	CTLA4	6	1	0.97872	0
P-0003275	Samstein et al.(PMID 30643254)	69	Male		Non-Small Cell Lung Cancer	PD-1/PDL-1	17	1	2.93616	0
P-0003278	Samstein et al.(PMID 30643254)	55	Female		Non-Small Cell Lung Cancer	PD-1/PDL-1	0	1	14.6808	0
P-0003283	Samstein et al.(PMID 30643254)	63	Male		Renal Cell Carcinoma	PD-1/PDL-1	17	0	2.93616	0
P-0003285	Samstein et al.(PMID 30643254)	37	Female		Colorectal Cancer	PD-1/PDL-1	3	0	4.8936	0
P-0003319	Samstein et al.(PMID 30643254)	15	Male		Glioma	PD-1/PDL-1	4	1	0.97872	0
P-0003322	Samstein et al.(PMID 30643254)	72	Female		Non-Small Cell Lung Cancer	Combo	13	0	2.93616	0
P-0003347	Samstein et al.(PMID 30643254)	59	Male		Non-Small Cell Lung Cancer	PD-1/PDL-1	15	1	15.6595	0
P-0003350	Samstein et al.(PMID 30643254)	59	Male		Glioma	PD-1/PDL-1	16	1	2.93616	0
P-0003359	Samstein et al.(PMID 30643254)	82	Male		Melanoma	PD-1/PDL-1	1	1	2.93616	0
P-0003360	Samstein et al.(PMID 30643254)	62	Male		Glioma	Combo	29	0	2.93616	0
P-0003365	Samstein et al.(PMID 30643254)	47	Male		Colorectal Cancer	PD-1/PDL-1	7	1	1.95744	0
P-0003368	Samstein et al.(PMID 30643254)	59	Female		Non-Small Cell Lung Cancer	Combo	38	0	8.80848	0
P-0003372	Samstein et al.(PMID 30643254)	56	Female		Melanoma	Combo	33	0	3.91488	0
P-0003374	Samstein et al.(PMID 30643254)	55	Male		Head and Neck Cancer	PD-1/PDL-1	1	1	1.95744	0
P-0003377	Samstein et al.(PMID 30643254)	64	Male		Bladder Cancer	PD-1/PDL-1	23	0	12.7234	0
P-0003401	Samstein et al.(PMID 30643254)	48	Female		Melanoma	CTLA4	25	1	0.97872	0
P-0003406	Samstein et al.(PMID 30643254)	35	Male		Renal Cell Carcinoma	PD-1/PDL-1	13	1	2.93616	0
P-0003432	Samstein et al.(PMID 30643254)	70	Male		Esophagogastric Cancer	PD-1/PDL-1	4	1	5.87232	0
P-0003456	Samstein et al.(PMID 30643254)	45	Female		Glioma	PD-1/PDL-1	9	1	2.93616	0
P-0003495	Samstein et al.(PMID 30643254)	90	Female		Non-Small Cell Lung Cancer	PD-1/PDL-1	21	1	3.91488	0
P-0003507	Samstein et al.(PMID 30643254)	57	Male		Bladder Cancer	PD-1/PDL-1	1	1	3.91488	0
P-0003521	Samstein et al.(PMID 30643254)	43	Male		Esophagogastric Cancer	PD-1/PDL-1	1	1	6.85104	0
P-0003524	Samstein et al.(PMID 30643254)	62	Male		Bladder Cancer	PD-1/PDL-1	39	0	42.0849	0
P-0003543	Samstein et al.(PMID 30643254)	75	Male		Esophagogastric Cancer	PD-1/PDL-1	2	1	2.93616	0
P-0003553	Samstein et al.(PMID 30643254)	70	Female		Non-Small Cell Lung Cancer	PD-1/PDL-1	21	0	29.3616	0
P-0003555	Samstein et al.(PMID 30643254)	32	Male		Bladder Cancer	PD-1/PDL-1	33	0	68.5104	0
P-0003559	Samstein et al.(PMID 30643254)	48	Female		Esophagogastric Cancer	Combo	5	0	0	0
P-0003560	Samstein et al.(PMID 30643254)	67	Male		Melanoma	CTLA4	41	0	45.0211	0
P-0003562	Samstein et al.(PMID 30643254)	62	Male		Non-Small Cell Lung Cancer	PD-1/PDL-1	45	0	36.2126	0
P-0003567	Samstein et al.(PMID 30643254)	50	Male		Glioma	PD-1/PDL-1	12	1	2.93616	0
P-0003568	Samstein et al.(PMID 30643254)	55	Male		Renal Cell Carcinoma	PD-1/PDL-1	45	0	3.91488	0
P-0003583	Samstein et al.(PMID 30643254)	59	Male		Renal Cell Carcinoma	Combo	34	0	0	0
P-0003584	Samstein et al.(PMID 30643254)	61	Female		Non-Small Cell Lung Cancer	PD-1/PDL-1	36	1	10.7659	0
P-0003596	Samstein et al.(PMID 30643254)	67	Male		Bladder Cancer	PD-1/PDL-1	4	1	11.7446	0
P-0003598	Samstein et al.(PMID 30643254)	48	Female		Glioma	PD-1/PDL-1	6	1	0.97872	0
P-0003620	Samstein et al.(PMID 30643254)	54	Female		Melanoma	CTLA4	33	0	19.5744	0
P-0003621	Samstein et al.(PMID 30643254)	49	Female		Melanoma	Combo	35	0	2.93616	0
P-0003628	Samstein et al.(PMID 30643254)	63	Male		Non-Small Cell Lung Cancer	PD-1/PDL-1	5	1	12.7234	0
P-0003635	Samstein et al.(PMID 30643254)	57	Female		Non-Small Cell Lung Cancer	Combo	2	1	6.85104	0
P-0003645	Samstein et al.(PMID 30643254)	77	Male		Renal Cell Carcinoma	PD-1/PDL-1	3	1	4.8936	0
P-0003650	Samstein et al.(PMID 30643254)	69	Male		Esophagogastric Cancer	PD-1/PDL-1	9	0	61.6593	0
P-0003670	Samstein et al.(PMID 30643254)	75	Female		Non-Small Cell Lung Cancer	PD-1/PDL-1	20	0	0.97872	0
P-0003698	Samstein et al.(PMID 30643254)	63	Male		Bladder Cancer	Combo	34	0	7.82976	0
P-0003700	Samstein et al.(PMID 30643254)	73	Male		Melanoma	Combo	36	0	2.93616	0
P-0003703	Samstein et al.(PMID 30643254)	64	Female		Melanoma	CTLA4	30	1	0.97872	0
P-0003711	Samstein et al.(PMID 30643254)	51	Male		Head and Neck Cancer	PD-1/PDL-1	5	1	6.85104	0
P-0003719	Samstein et al.(PMID 30643254)	43	Female		Bladder Cancer	PD-1/PDL-1	15	1	47.9573	0
P-0003721	Samstein et al.(PMID 30643254)	57	Female		Renal Cell Carcinoma	Combo	35	0	2.93616	0
P-0003726	Samstein et al.(PMID 30643254)	68	Female		Head and Neck Cancer	PD-1/PDL-1	15	0	0	0
P-0003728	Samstein et al.(PMID 30643254)	56	Male		Melanoma	Combo	34	0	47.9573	0
P-0003738	Samstein et al.(PMID 30643254)	58	Female		Non-Small Cell Lung Cancer	PD-1/PDL-1	27	0	4.8936	0
P-0003742	Samstein et al.(PMID 30643254)	36	Female		Melanoma	CTLA4	18	1	4.8936	1
P-0003743	Samstein et al.(PMID 30643254)	71	Male		Melanoma	Combo	51	0	8.80848	0
P-0003749	Samstein et al.(PMID 30643254)	61	Male		Melanoma	Combo	24	0	4.8936	0
P-0003757	Samstein et al.(PMID 30643254)	65	Male		Melanoma	Combo	35	0	8.80848	0
P-0003766	Samstein et al.(PMID 30643254)	60	Male		Renal Cell Carcinoma	PD-1/PDL-1	11	1	4.8936	0
P-0003782	Samstein et al.(PMID 30643254)	57	Male		Non-Small Cell Lung Cancer	PD-1/PDL-1	8	1	2.93616	0
P-0003783	Samstein et al.(PMID 30643254)	54	Male		Glioma	PD-1/PDL-1	13	1	1.95744	0
P-0003811	Samstein et al.(PMID 30643254)	68	Female		Non-Small Cell Lung Cancer	PD-1/PDL-1	0	1	16.6382	0
P-0003814	Samstein et al.(PMID 30643254)	50	Female		Bladder Cancer	PD-1/PDL-1	5	0	2.93616	0
P-0003841	Samstein et al.(PMID 30643254)	77	Male		Bladder Cancer	PD-1/PDL-1	0	0	11.7446	0
P-0003865	Samstein et al.(PMID 30643254)	55	Female		Glioma	PD-1/PDL-1	6	1	6.85104	0
P-0003868	Samstein et al.(PMID 30643254)	51	Male		Melanoma	Combo	49	1	13.7021	0
P-0003869	Samstein et al.(PMID 30643254)	67	Female		Non-Small Cell Lung Cancer	PD-1/PDL-1	40	0	54.8083	0
P-0003871	Samstein et al.(PMID 30643254)	84	Male		Melanoma	PD-1/PDL-1	4	0	88.0848	1
P-0003872	Samstein et al.(PMID 30643254)	56	Female		Melanoma	CTLA4	65	0	19.5744	0
P-0003881	Samstein et al.(PMID 30643254)	67	Male		Melanoma	Combo	26	0	4.8936	0
P-0003892	Samstein et al.(PMID 30643254)	73	Female		Esophagogastric Cancer	Combo	2	0	2.93616	0
P-0003899	Samstein et al.(PMID 30643254)	68	Male		Melanoma	PD-1/PDL-1	3	0	1.95744	0
P-0003911	Samstein et al.(PMID 30643254)	70	Female		Bladder Cancer	PD-1/PDL-1	3	1	4.8936	0
P-0003913	Samstein et al.(PMID 30643254)	44	Female		Non-Small Cell Lung Cancer	PD-1/PDL-1	1	1	3.32747	0
P-0003914	Samstein et al.(PMID 30643254)	62	Male		Esophagogastric Cancer	PD-1/PDL-1	1	1	9.9824	0
P-0003921	Samstein et al.(PMID 30643254)	47	Male		Melanoma	Combo	7	0	14.6808	0
P-0003944	Samstein et al.(PMID 30643254)	71	Male		Esophagogastric Cancer	CTLA4	21	1	5.54578	0
P-0003955	Samstein et al.(PMID 30643254)	75	Male		Bladder Cancer	PD-1/PDL-1	15	1	6.65493	0
P-0003964	Samstein et al.(PMID 30643254)	72	Male		Non-Small Cell Lung Cancer	PD-1/PDL-1	4	1	9.9824	0
P-0003967	Samstein et al.(PMID 30643254)	49	Female		Non-Small Cell Lung Cancer	PD-1/PDL-1	13	0	3.91488	0
P-0003970	Samstein et al.(PMID 30643254)	46	Female		Non-Small Cell Lung Cancer	PD-1/PDL-1	12	1	1.95744	0
P-0003972	Samstein et al.(PMID 30643254)	65	Male		Non-Small Cell Lung Cancer	PD-1/PDL-1	0	1	5.87232	0
P-0004011	Samstein et al.(PMID 30643254)	61	Male		Colorectal Cancer	PD-1/PDL-1	9	0	63.6168	1
P-0004016	Samstein et al.(PMID 30643254)	55	Male		Esophagogastric Cancer	PD-1/PDL-1	3	1	5.87232	0
P-0004020	Samstein et al.(PMID 30643254)	58	Female		Non-Small Cell Lung Cancer	Combo	28	1	4.8936	0
P-0004043	Samstein et al.(PMID 30643254)	77	Male		Esophagogastric Cancer	PD-1/PDL-1	4	1	5.54578	0
P-0004048	Samstein et al.(PMID 30643254)	56	Male		Melanoma	PD-1/PDL-1	41	1	0.97872	0
P-0004050	Samstein et al.(PMID 30643254)	54	Male		Bladder Cancer	PD-1/PDL-1	43	0	12.2007	0
P-0004051	Samstein et al.(PMID 30643254)	68	Male		Colorectal Cancer	PD-1/PDL-1	28	0	68.5104	0
P-0004054	Samstein et al.(PMID 30643254)	61	Male		Non-Small Cell Lung Cancer	PD-1/PDL-1	4	1	13.7021	0
P-0004056	Samstein et al.(PMID 30643254)	65	Male		Bladder Cancer	PD-1/PDL-1	6	1	13.7021	0
P-0004077	Samstein et al.(PMID 30643254)	36	Female		Renal Cell Carcinoma	Combo	7	1	1.95744	0
P-0004099	Samstein et al.(PMID 30643254)	61	Male		Non-Small Cell Lung Cancer	PD-1/PDL-1	3	1	12.7234	0
P-0004103	Samstein et al.(PMID 30643254)	44	Female		Non-Small Cell Lung Cancer	Combo	23	1	0.97872	0
P-0004117	Samstein et al.(PMID 30643254)	57	Male		Non-Small Cell Lung Cancer	PD-1/PDL-1	2	1	3.91488	0
P-0004120	Samstein et al.(PMID 30643254)	58	Female		Non-Small Cell Lung Cancer	PD-1/PDL-1	12	0	0.97872	0
P-0004126	Samstein et al.(PMID 30643254)	17	Female		Head and Neck Cancer	PD-1/PDL-1	14	0	0	0
P-0004132	Samstein et al.(PMID 30643254)	42	Male		Melanoma	Combo	22	1	4.8936	0
P-0004137	Samstein et al.(PMID 30643254)	60	Male		Bladder Cancer	Combo	27	0	25.4467	0
P-0004140	Samstein et al.(PMID 30643254)	62	Male		Colorectal Cancer	PD-1/PDL-1	7	1	10.7659	0
P-0004142	Samstein et al.(PMID 30643254)	67	Female		Melanoma	CTLA4	35	0	22.5106	0
P-0004150	Samstein et al.(PMID 30643254)	73	Male		Renal Cell Carcinoma	PD-1/PDL-1	25	0	5.87232	0
P-0004170	Samstein et al.(PMID 30643254)	59	Male		Renal Cell Carcinoma	Combo	38	0	1.95744	0
P-0004189	Samstein et al.(PMID 30643254)	71	Male		Non-Small Cell Lung Cancer	PD-1/PDL-1	16	0	58.7232	0
P-0004203	Samstein et al.(PMID 30643254)	23	Male		Melanoma	Combo	32	0	8.80848	0
P-0004214	Samstein et al.(PMID 30643254)	84	Male		Melanoma	PD-1/PDL-1	31	1	33.2765	0
P-0004226	Samstein et al.(PMID 30643254)	52	Male		Bladder Cancer	PD-1/PDL-1	18	0	5.87232	0
P-0004232	Samstein et al.(PMID 30643254)	75	Male		Non-Small Cell Lung Cancer	PD-1/PDL-1	18	1	6.85104	0
P-0004240	Samstein et al.(PMID 30643254)	76	Female		Bladder Cancer	Combo	4	1	5.87232	0
P-0004253	Samstein et al.(PMID 30643254)	59	Male		Melanoma	CTLA4	42	1	8.80848	0
P-0004256	Samstein et al.(PMID 30643254)	33	Male		Glioma	PD-1/PDL-1	7	1	3.91488	0
P-0004257	Samstein et al.(PMID 30643254)	81	Female		Bladder Cancer	PD-1/PDL-1	6	0	8.80848	0
P-0004259	Samstein et al.(PMID 30643254)	47	Male		Glioma	PD-1/PDL-1	2	1	5.87232	0
P-0004272	Samstein et al.(PMID 30643254)	77	Male		Melanoma	PD-1/PDL-1	3	1	9.7872	0
P-0004279	Samstein et al.(PMID 30643254)	59	Female		Non-Small Cell Lung Cancer	PD-1/PDL-1	13	0	2.93616	0
P-0004294	Samstein et al.(PMID 30643254)	54	Male		Renal Cell Carcinoma	PD-1/PDL-1	7	1	3.91488	0
P-0004315	Samstein et al.(PMID 30643254)	86	Female		Non-Small Cell Lung Cancer	PD-1/PDL-1	1	1	8.80848	1
P-0004329	Samstein et al.(PMID 30643254)	25	Male		Cancer of Unknown Primary	Combo	15	0	1.95744	0
P-0004348	Samstein et al.(PMID 30643254)	50	Female		Melanoma	Combo	32	0	22.5106	0
P-0004349	Samstein et al.(PMID 30643254)	72	Female		Melanoma	PD-1/PDL-1	35	0	5.87232	0
P-0004362	Samstein et al.(PMID 30643254)	38	Male		Colorectal Cancer	PD-1/PDL-1	34	1	68.5104	1
P-0004366	Samstein et al.(PMID 30643254)	59	Female		Bladder Cancer	Combo	9	0	4.8936	0
P-0004376	Samstein et al.(PMID 30643254)	80	Male		Renal Cell Carcinoma	PD-1/PDL-1	49	0	5.87232	0
P-0004387	Samstein et al.(PMID 30643254)	85	Male		Bladder Cancer	PD-1/PDL-1	6	1	1.95744	0
P-0004395	Samstein et al.(PMID 30643254)	65	Female		Non-Small Cell Lung Cancer	PD-1/PDL-1	0	1	7.82976	0
P-0004397	Samstein et al.(PMID 30643254)	51	Male		Renal Cell Carcinoma	PD-1/PDL-1	38	0	3.91488	0
P-0004412	Samstein et al.(PMID 30643254)	55	Male		Renal Cell Carcinoma	PD-1/PDL-1	21	0	3.91488	0
P-0004413	Samstein et al.(PMID 30643254)	73	Female		Renal Cell Carcinoma	PD-1/PDL-1	39	0	1.95744	0
P-0004416	Samstein et al.(PMID 30643254)	45	Male		Head and Neck Cancer	PD-1/PDL-1	1	1	1.95744	0
P-0004436	Samstein et al.(PMID 30643254)	75	Male		Non-Small Cell Lung Cancer	PD-1/PDL-1	24	1	5.87232	0
P-0004437	Samstein et al.(PMID 30643254)	82	Female		Melanoma	Combo	35	0	13.7021	0
P-0004442	Samstein et al.(PMID 30643254)	62	Male		Non-Small Cell Lung Cancer	PD-1/PDL-1	26	0	34.2552	0
P-0004457	Samstein et al.(PMID 30643254)	83	Female		Melanoma	PD-1/PDL-1	11	1	38.1701	0
P-0004458	Samstein et al.(PMID 30643254)	44	Male		Renal Cell Carcinoma	PD-1/PDL-1	24	0	6.85104	0
P-0004463	Samstein et al.(PMID 30643254)	83	Male		Non-Small Cell Lung Cancer	PD-1/PDL-1	13	1	6.85104	0
P-0004472	Samstein et al.(PMID 30643254)	63	Female		Non-Small Cell Lung Cancer	PD-1/PDL-1	10	1	13.7021	0
P-0004492	Samstein et al.(PMID 30643254)	66	Male		Head and Neck Cancer	PD-1/PDL-1	20	1	2.93616	0
P-0004494	Samstein et al.(PMID 30643254)	73	Female		Colorectal Cancer	PD-1/PDL-1	11	0	9.7872	0
P-0004495	Samstein et al.(PMID 30643254)	40	Male		Non-Small Cell Lung Cancer	PD-1/PDL-1	8	1	8.80848	0
P-0004507	Samstein et al.(PMID 30643254)	62	Male		Renal Cell Carcinoma	PD-1/PDL-1	42	0	3.91488	0
P-0004517	Samstein et al.(PMID 30643254)	68	Male		Non-Small Cell Lung Cancer	PD-1/PDL-1	22	1	14.6808	0
P-0004518	Samstein et al.(PMID 30643254)	67	Female		Melanoma	CTLA4	38	0	24.468	0
P-0004527	Samstein et al.(PMID 30643254)	68	Female		Melanoma	CTLA4	47	1	5.87232	0
P-0004552	Samstein et al.(PMID 30643254)	49	Male		Esophagogastric Cancer	Combo	9	1	1.95744	0
P-0004561	Samstein et al.(PMID 30643254)	63	Male		Renal Cell Carcinoma	PD-1/PDL-1	8	1	6.85104	0
P-0004588	Samstein et al.(PMID 30643254)	73	Male		Non-Small Cell Lung Cancer	PD-1/PDL-1	30	0	3.91488	0
P-0004605	Samstein et al.(PMID 30643254)	42	Male		Esophagogastric Cancer	PD-1/PDL-1	7	0	5.87232	0
P-0004612	Samstein et al.(PMID 30643254)	74	Male		Non-Small Cell Lung Cancer	PD-1/PDL-1	4	1	3.91488	0
P-0004613	Samstein et al.(PMID 30643254)	61	Female		Non-Small Cell Lung Cancer	PD-1/PDL-1	0	0	3.91488	0
P-0004661	Samstein et al.(PMID 30643254)	33	Male		Melanoma	Combo	32	0	6.85104	0
P-0004686	Samstein et al.(PMID 30643254)	61	Female		Melanoma	PD-1/PDL-1	5	1	2.93616	0
P-0004693	Samstein et al.(PMID 30643254)	74	Female		Non-Small Cell Lung Cancer	PD-1/PDL-1	2	1	9.7872	0
P-0004700	Samstein et al.(PMID 30643254)	59	Male		Melanoma	PD-1/PDL-1	32	1	0	0
P-0004701	Samstein et al.(PMID 30643254)	53	Female		Non-Small Cell Lung Cancer	PD-1/PDL-1	30	0	19.5744	1
P-0004706	Samstein et al.(PMID 30643254)	39	Male		Melanoma	Combo	13	1	3.91488	0
P-0004742	Samstein et al.(PMID 30643254)	69	Male		Non-Small Cell Lung Cancer	PD-1/PDL-1	18	0	8.80848	0
P-0004752	Samstein et al.(PMID 30643254)	86	Male		Non-Small Cell Lung Cancer	PD-1/PDL-1	29	0	0.97872	0
P-0004759	Samstein et al.(PMID 30643254)	63	Female		Non-Small Cell Lung Cancer	PD-1/PDL-1	2	1	1.95744	0
P-0004778	Samstein et al.(PMID 30643254)	45	Male		Glioma	PD-1/PDL-1	16	1	0.97872	0
P-0004783	Samstein et al.(PMID 30643254)	43	Male		Colorectal Cancer	Combo	21	0	46.9785	1
P-0004803	Samstein et al.(PMID 30643254)	59	Male		Colorectal Cancer	PD-1/PDL-1	6	0	7.82976	0
P-0004812	Samstein et al.(PMID 30643254)	43	Male		Glioma	PD-1/PDL-1	21	0	2.93616	0
P-0004813	Samstein et al.(PMID 30643254)	61	Male		Renal Cell Carcinoma	PD-1/PDL-1	39	0	3.91488	0
P-0004815	Samstein et al.(PMID 30643254)	85	Male		Melanoma	PD-1/PDL-1	2	1	3.91488	0
P-0004827	Samstein et al.(PMID 30643254)	59	Male		Non-Small Cell Lung Cancer	PD-1/PDL-1	19	1	8.80848	0
P-0004832	Samstein et al.(PMID 30643254)	58	Male		Melanoma	CTLA4	29	1	1.95744	0
P-0004857	Samstein et al.(PMID 30643254)	35	Male		Glioma	PD-1/PDL-1	33	0	3.91488	0
P-0004871	Samstein et al.(PMID 30643254)	63	Female		Melanoma	CTLA4	44	0	7.82976	0
P-0004890	Samstein et al.(PMID 30643254)	69	Female		Non-Small Cell Lung Cancer	PD-1/PDL-1	18	0	10.7659	0
P-0004933	Samstein et al.(PMID 30643254)	56	Male		Melanoma	Combo	33	0	14.6808	0
P-0004952	Samstein et al.(PMID 30643254)	54	Male		Melanoma	Combo	32	0	36.2126	0
P-0004961	Samstein et al.(PMID 30643254)	68	Female		Non-Small Cell Lung Cancer	PD-1/PDL-1	9	1	0.97872	0
P-0004971	Samstein et al.(PMID 30643254)	45	Male		Glioma	PD-1/PDL-1	17	1	3.91488	0
P-0004983	Samstein et al.(PMID 30643254)	55	Male		Bladder Cancer	Combo	34	0	1.95744	0
P-0004996	Samstein et al.(PMID 30643254)	57	Male		Non-Small Cell Lung Cancer	Combo	46	1	2.93616	0
P-0005021	Samstein et al.(PMID 30643254)	68	Male		Bladder Cancer	PD-1/PDL-1	25	0	207.489	0
P-0005039	Samstein et al.(PMID 30643254)	78	Female		Melanoma	Combo	1	1	28.3829	0
P-0005048	Samstein et al.(PMID 30643254)	70	Female		Non-Small Cell Lung Cancer	Combo	51	0	3.91488	0
P-0005053	Samstein et al.(PMID 30643254)	57	Male		Melanoma	Combo	36	0	11.7446	0
P-0005054	Samstein et al.(PMID 30643254)	61	Female		Bladder Cancer	PD-1/PDL-1	3	0	19.5744	0
P-0005062	Samstein et al.(PMID 30643254)	59	Female		Melanoma	Combo	31	0	0.97872	0
P-0005082	Samstein et al.(PMID 30643254)	60	Male		Head and Neck Cancer	PD-1/PDL-1	34	1	0	0
P-0005109	Samstein et al.(PMID 30643254)	61	Male		Melanoma	Combo	18	0	16.6382	0
P-0005115	Samstein et al.(PMID 30643254)	54	Male		Non-Small Cell Lung Cancer	PD-1/PDL-1	15	0	1.95744	0
P-0005118	Samstein et al.(PMID 30643254)	76	Male		Melanoma	Combo	28	0	16.6382	0
P-0005121	Samstein et al.(PMID 30643254)	57	Female		Melanoma	PD-1/PDL-1	11	0	2.93616	0
P-0005129	Samstein et al.(PMID 30643254)	90	Female		Melanoma	PD-1/PDL-1	11	1	8.80848	0
P-0005131	Samstein et al.(PMID 30643254)	68	Female		Breast Cancer	CTLA4	5	1	1.95744	0
P-0005132	Samstein et al.(PMID 30643254)	56	Male		Colorectal Cancer	PD-1/PDL-1	31	0	6.85104	0
P-0005141	Samstein et al.(PMID 30643254)	56	Male		Glioma	PD-1/PDL-1	33	0	0.97872	0
P-0005144	Samstein et al.(PMID 30643254)	64	Male		Melanoma	CTLA4	40	1	5.87232	0
P-0005146	Samstein et al.(PMID 30643254)	78	Female		Melanoma	PD-1/PDL-1	32	0	8.80848	0
P-0005150	Samstein et al.(PMID 30643254)	75	Male		Bladder Cancer	PD-1/PDL-1	1	0	0.97872	0
P-0005151	Samstein et al.(PMID 30643254)	37	Male		Colorectal Cancer	PD-1/PDL-1	30	0	65.5742	0
P-0005157	Samstein et al.(PMID 30643254)	25	Male		Melanoma	Combo	7	1	3.91488	0
P-0005159	Samstein et al.(PMID 30643254)	83	Male		Melanoma	PD-1/PDL-1	27	1	99.8294	1
P-0005176	Samstein et al.(PMID 30643254)	31	Female		Breast Cancer	CTLA4	5	1	1.95744	0
P-0005177	Samstein et al.(PMID 30643254)	53	Male		Renal Cell Carcinoma	PD-1/PDL-1	19	1	0.97872	0
P-0005180	Samstein et al.(PMID 30643254)	72	Male		Melanoma	PD-1/PDL-1	11	1	1.95744	0
P-0005187	Samstein et al.(PMID 30643254)	44	Female		Renal Cell Carcinoma	Combo	33	0	6.85104	0
P-0005201	Samstein et al.(PMID 30643254)	55	Male		Melanoma	Combo	32	0	8.80848	0
P-0005222	Samstein et al.(PMID 30643254)	53	Male		Melanoma	CTLA4	69	0	14.6808	0
P-0005226	Samstein et al.(PMID 30643254)	56	Male		Renal Cell Carcinoma	PD-1/PDL-1	29	1	2.93616	0
P-0005228	Samstein et al.(PMID 30643254)	76	Male		Melanoma	PD-1/PDL-1	39	0	91.9997	1
P-0005235	Samstein et al.(PMID 30643254)	61	Male		Melanoma	Combo	27	1	0.97872	0
P-0005239	Samstein et al.(PMID 30643254)	52	Female		Cancer of Unknown Primary	PD-1/PDL-1	18	0	3.91488	0
P-0005252	Samstein et al.(PMID 30643254)	79	Female		Non-Small Cell Lung Cancer	PD-1/PDL-1	2	1	12.7234	0
P-0005254	Samstein et al.(PMID 30643254)	57	Female		Glioma	PD-1/PDL-1	5	1	0.97872	0
P-0005260	Samstein et al.(PMID 30643254)	77	Female		Melanoma	PD-1/PDL-1	13	0	11.7446	0
P-0005266	Samstein et al.(PMID 30643254)	68	Male		Bladder Cancer	PD-1/PDL-1	7	0	5.87232	0
P-0005271	Samstein et al.(PMID 30643254)	64	Male		Renal Cell Carcinoma	PD-1/PDL-1	50	1	7.82976	0
P-0005274	Samstein et al.(PMID 30643254)	69	Female		Breast Cancer	PD-1/PDL-1	2	1	5.87232	0
P-0005289	Samstein et al.(PMID 30643254)	68	Male		Non-Small Cell Lung Cancer	PD-1/PDL-1	5	1	9.7872	0
P-0005295	Samstein et al.(PMID 30643254)	73	Male		Non-Small Cell Lung Cancer	PD-1/PDL-1	29	0	3.91488	0
P-0005304	Samstein et al.(PMID 30643254)	47	Female		Melanoma	Combo	1	1	1.95744	0
P-0005309	Samstein et al.(PMID 30643254)	47	Male		Cancer of Unknown Primary	PD-1/PDL-1	1	1	25.4467	0
P-0005320	Samstein et al.(PMID 30643254)	47	Male		Non-Small Cell Lung Cancer	PD-1/PDL-1	17	1	7.82976	0
P-0005328	Samstein et al.(PMID 30643254)	78	Male		Renal Cell Carcinoma	PD-1/PDL-1	56	0	5.87232	0
P-0005332	Samstein et al.(PMID 30643254)	66	Female		Renal Cell Carcinoma	PD-1/PDL-1	20	1	2.93616	0
P-0005352	Samstein et al.(PMID 30643254)	65	Female		Melanoma	Combo	30	0	7.82976	0
P-0005354	Samstein et al.(PMID 30643254)	60	Male		Renal Cell Carcinoma	PD-1/PDL-1	44	1	5.87232	0
P-0005361	Samstein et al.(PMID 30643254)	54	Female		Glioma	PD-1/PDL-1	25	0	2.93616	0
P-0005366	Samstein et al.(PMID 30643254)	74	Male		Melanoma	PD-1/PDL-1	13	1	147.787	1
P-0005383	Samstein et al.(PMID 30643254)	41	Male		Melanoma	PD-1/PDL-1	49	0	21.5318	1
P-0005421	Samstein et al.(PMID 30643254)	72	Male		Melanoma	PD-1/PDL-1	32	0	14.6808	0
P-0005437	Samstein et al.(PMID 30643254)	66	Female		Renal Cell Carcinoma	PD-1/PDL-1	37	0	0	0
P-0005456	Samstein et al.(PMID 30643254)	77	Male		Non-Small Cell Lung Cancer	PD-1/PDL-1	2	1	5.87232	0
P-0005458	Samstein et al.(PMID 30643254)	63	Female		Renal Cell Carcinoma	PD-1/PDL-1	36	0	2.93616	0
P-0005464	Samstein et al.(PMID 30643254)	67	Female		Non-Small Cell Lung Cancer	PD-1/PDL-1	11	1	6.85104	0
P-0005488	Samstein et al.(PMID 30643254)	58	Male		Esophagogastric Cancer	PD-1/PDL-1	21	1	10.7659	0
P-0005489	Samstein et al.(PMID 30643254)	50	Male		Bladder Cancer	PD-1/PDL-1	16	1	11.7446	0
P-0005493	Samstein et al.(PMID 30643254)	27	Male		Melanoma	Combo	31	0	6.85104	0
P-0005494	Samstein et al.(PMID 30643254)	72	Male		Renal Cell Carcinoma	Combo	33	0	0	0
P-0005500	Samstein et al.(PMID 30643254)	62	Male		Esophagogastric Cancer	CTLA4	1	1	24.468	0
P-0005510	Samstein et al.(PMID 30643254)	69	Female		Non-Small Cell Lung Cancer	PD-1/PDL-1	55	0	5.87232	0
P-0005522	Samstein et al.(PMID 30643254)	73	Female		Colorectal Cancer	PD-1/PDL-1	17	0	6.85104	0
P-0005534	Samstein et al.(PMID 30643254)	56	Male		Cancer of Unknown Primary	PD-1/PDL-1	0	0	4.8936	0
P-0005539	Samstein et al.(PMID 30643254)	50	Female		Glioma	PD-1/PDL-1	8	1	1.95744	0
P-0005553	Samstein et al.(PMID 30643254)	49	Male		Non-Small Cell Lung Cancer	PD-1/PDL-1	1	1	4.8936	0
P-0005579	Samstein et al.(PMID 30643254)	56	Female		Non-Small Cell Lung Cancer	PD-1/PDL-1	1	1	1.95744	0
P-0005583	Samstein et al.(PMID 30643254)	25	Female		Melanoma	Combo	1	1	5.87232	0
P-0005593	Samstein et al.(PMID 30643254)	67	Male		Renal Cell Carcinoma	PD-1/PDL-1	59	0	0.97872	0
P-0005604	Samstein et al.(PMID 30643254)	33	Male		Melanoma	Combo	30	0	4.8936	0
P-0005627	Samstein et al.(PMID 30643254)	69	Male		Bladder Cancer	PD-1/PDL-1	28	0	26.4254	1
P-0005629	Samstein et al.(PMID 30643254)	81	Female		Non-Small Cell Lung Cancer	PD-1/PDL-1	5	1	5.87232	0
P-0005634	Samstein et al.(PMID 30643254)	34	Male		Colorectal Cancer	CTLA4	4	1	8.80848	0
P-0005635	Samstein et al.(PMID 30643254)	46	Female		Glioma	PD-1/PDL-1	1	0	5.87232	0
P-0005641	Samstein et al.(PMID 30643254)	76	Male		Renal Cell Carcinoma	PD-1/PDL-1	7	1	0.97872	0
P-0005650	Samstein et al.(PMID 30643254)	77	Male		Bladder Cancer	Combo	8	1	3.91488	0
P-0005655	Samstein et al.(PMID 30643254)	74	Female		Melanoma	PD-1/PDL-1	23	0	3.91488	0
P-0005682	Samstein et al.(PMID 30643254)	66	Male		Renal Cell Carcinoma	PD-1/PDL-1	20	1	3.91488	0
P-0005687	Samstein et al.(PMID 30643254)	53	Male		Melanoma	PD-1/PDL-1	11	1	1.95744	0
P-0005711	Samstein et al.(PMID 30643254)	47	Male		Non-Small Cell Lung Cancer	PD-1/PDL-1	6	1	2.93616	0
P-0005712	Samstein et al.(PMID 30643254)	43	Female		Breast Cancer	CTLA4	20	0	3.91488	0
P-0005719	Samstein et al.(PMID 30643254)	71	Male		Renal Cell Carcinoma	PD-1/PDL-1	48	0	3.91488	0
P-0005721	Samstein et al.(PMID 30643254)	79	Male		Non-Small Cell Lung Cancer	PD-1/PDL-1	14	1	6.85104	0
P-0005725	Samstein et al.(PMID 30643254)	71	Male		Melanoma	PD-1/PDL-1	13	0	25.4467	0
P-0005727	Samstein et al.(PMID 30643254)	51	Male		Bladder Cancer	Combo	11	1	1.95744	0
P-0005731	Samstein et al.(PMID 30643254)	55	Male		Bladder Cancer	PD-1/PDL-1	1	1	23.4893	0
P-0005733	Samstein et al.(PMID 30643254)	66	Female		Melanoma	CTLA4	44	1	17.617	1
P-0005747	Samstein et al.(PMID 30643254)	69	Male		Renal Cell Carcinoma	PD-1/PDL-1	29	0	2.93616	0
P-0005750	Samstein et al.(PMID 30643254)	72	Male		Renal Cell Carcinoma	PD-1/PDL-1	21	0	7.82976	0
P-0005752	Samstein et al.(PMID 30643254)	66	Male		Non-Small Cell Lung Cancer	PD-1/PDL-1	14	1	3.91488	0
P-0005762	Samstein et al.(PMID 30643254)	41	Male		Colorectal Cancer	PD-1/PDL-1	10	0	1.95744	0
P-0005783	Samstein et al.(PMID 30643254)	52	Female		Cancer of Unknown Primary	PD-1/PDL-1	7	0	65.5742	0
P-0005791	Samstein et al.(PMID 30643254)	58	Male		Head and Neck Cancer	PD-1/PDL-1	25	0	3.91488	0
P-0005792	Samstein et al.(PMID 30643254)	59	Male		Non-Small Cell Lung Cancer	PD-1/PDL-1	10	1	10.7659	0
P-0005794	Samstein et al.(PMID 30643254)	42	Male		Renal Cell Carcinoma	PD-1/PDL-1	14	0	1.95744	0
P-0005795	Samstein et al.(PMID 30643254)	53	Male		Cancer of Unknown Primary	PD-1/PDL-1	10	1	0	0
P-0005808	Samstein et al.(PMID 30643254)	41	Male		Renal Cell Carcinoma	PD-1/PDL-1	48	0	4.8936	0
P-0005822	Samstein et al.(PMID 30643254)	58	Female		Renal Cell Carcinoma	PD-1/PDL-1	4	1	2.93616	0
P-0005823	Samstein et al.(PMID 30643254)	66	Male		Colorectal Cancer	PD-1/PDL-1	29	0	88.0848	0
P-0005842	Samstein et al.(PMID 30643254)	64	Male		Bladder Cancer	PD-1/PDL-1	15	0	40.1275	0
P-0005848	Samstein et al.(PMID 30643254)	80	Female		Non-Small Cell Lung Cancer	PD-1/PDL-1	14	0	16.6382	0
P-0005851	Samstein et al.(PMID 30643254)	80	Male		Non-Small Cell Lung Cancer	PD-1/PDL-1	18	0	20.5531	0
P-0005855	Samstein et al.(PMID 30643254)	57	Female		Breast Cancer	CTLA4	3	1	5.87232	0
P-0005869	Samstein et al.(PMID 30643254)	68	Male		Head and Neck Cancer	PD-1/PDL-1	7	1	1.95744	0
P-0005882	Samstein et al.(PMID 30643254)	56	Male		Glioma	PD-1/PDL-1	5	1	1.95744	0
P-0005897	Samstein et al.(PMID 30643254)	44	Male		Non-Small Cell Lung Cancer	PD-1/PDL-1	5	1	5.87232	0
P-0005898	Samstein et al.(PMID 30643254)	71	Female		Non-Small Cell Lung Cancer	PD-1/PDL-1	21	0	3.91488	0
P-0005912	Samstein et al.(PMID 30643254)	56	Male		Glioma	PD-1/PDL-1	29	1	2.93616	0
P-0005913	Samstein et al.(PMID 30643254)	57	Male		Renal Cell Carcinoma	PD-1/PDL-1	26	0	8.80848	0
P-0005928	Samstein et al.(PMID 30643254)	68	Male		Melanoma	PD-1/PDL-1	29	0	17.617	0
P-0005929	Samstein et al.(PMID 30643254)	74	Female		Glioma	PD-1/PDL-1	15	1	5.87232	0
P-0005947	Samstein et al.(PMID 30643254)	62	Female		Bladder Cancer	PD-1/PDL-1	2	0	27.4042	0
P-0005954	Samstein et al.(PMID 30643254)	59	Male		Renal Cell Carcinoma	PD-1/PDL-1	38	0	2.93616	0
P-0005958	Samstein et al.(PMID 30643254)	66	Male		Renal Cell Carcinoma	Combo	39	0	3.91488	0
P-0005963	Samstein et al.(PMID 30643254)	15	Male		Glioma	PD-1/PDL-1	3	1	1.95744	0
P-0005965	Samstein et al.(PMID 30643254)	62	Female		Renal Cell Carcinoma	PD-1/PDL-1	19	0	3.91488	0
P-0005971	Samstein et al.(PMID 30643254)	25	Female		Melanoma	Combo	13	1	2.93616	0
P-0005981	Samstein et al.(PMID 30643254)	61	Male		Non-Small Cell Lung Cancer	PD-1/PDL-1	47	0	9.7872	0
P-0005998	Samstein et al.(PMID 30643254)	44	Male		Colorectal Cancer	PD-1/PDL-1	9	1	3.91488	0
P-0006008	Samstein et al.(PMID 30643254)	63	Male		Head and Neck Cancer	PD-1/PDL-1	7	1	8.80848	0
P-0006026	Samstein et al.(PMID 30643254)	66	Male		Esophagogastric Cancer	PD-1/PDL-1	12	0	6.85104	0
P-0006034	Samstein et al.(PMID 30643254)	74	Male		Melanoma	Combo	30	0	43.0637	1
P-0006045	Samstein et al.(PMID 30643254)	64	Female		Glioma	PD-1/PDL-1	20	1	1.95744	0
P-0006046	Samstein et al.(PMID 30643254)	59	Male		Non-Small Cell Lung Cancer	PD-1/PDL-1	14	0	19.5744	0
P-0006047	Samstein et al.(PMID 30643254)	63	Female		Non-Small Cell Lung Cancer	PD-1/PDL-1	24	0	1.95744	0
P-0006055	Samstein et al.(PMID 30643254)	47	Female		Renal Cell Carcinoma	Combo	24	1	5.87232	0
P-0006071	Samstein et al.(PMID 30643254)	52	Female		Non-Small Cell Lung Cancer	PD-1/PDL-1	19	0	19.5744	0
P-0006077	Samstein et al.(PMID 30643254)	77	Female		Esophagogastric Cancer	PD-1/PDL-1	1	1	4.8936	0
P-0006084	Samstein et al.(PMID 30643254)	62	Male		Non-Small Cell Lung Cancer	PD-1/PDL-1	21	1	6.85104	0
P-0006095	Samstein et al.(PMID 30643254)	65	Male		Renal Cell Carcinoma	PD-1/PDL-1	6	1	5.87232	0
P-0006097	Samstein et al.(PMID 30643254)	76	Male		Bladder Cancer	PD-1/PDL-1	10	0	6.85104	0
P-0006109	Samstein et al.(PMID 30643254)	59	Female		Melanoma	CTLA4	5	0	0.97872	0
P-0006114	Samstein et al.(PMID 30643254)	54	Female		Non-Small Cell Lung Cancer	PD-1/PDL-1	7	1	2.93616	0
P-0006121	Samstein et al.(PMID 30643254)	81	Female		Melanoma	CTLA4	50	0	2.93616	0
P-0006155	Samstein et al.(PMID 30643254)	83	Male		Melanoma	PD-1/PDL-1	4	0	71.4465	0
P-0006177	Samstein et al.(PMID 30643254)	62	Male		Melanoma	PD-1/PDL-1	8	1	42.0849	1
P-0006192	Samstein et al.(PMID 30643254)	35	Female		Melanoma	Combo	30	0	6.85104	1
P-0006193	Samstein et al.(PMID 30643254)	82	Female		Melanoma	Combo	2	1	8.80848	0
P-0006213	Samstein et al.(PMID 30643254)	50	Male		Colorectal Cancer	PD-1/PDL-1	5	1	8.80848	0
P-0006220	Samstein et al.(PMID 30643254)	90	Male		Renal Cell Carcinoma	PD-1/PDL-1	1	1	1.95744	0
P-0006221	Samstein et al.(PMID 30643254)	48	Female		Non-Small Cell Lung Cancer	PD-1/PDL-1	13	1	0	0
P-0006222	Samstein et al.(PMID 30643254)	61	Female		Renal Cell Carcinoma	PD-1/PDL-1	24	1	4.8936	0
P-0006227	Samstein et al.(PMID 30643254)	43	Female		Breast Cancer	PD-1/PDL-1	4	1	6.85104	0
P-0006239	Samstein et al.(PMID 30643254)	72	Male		Renal Cell Carcinoma	PD-1/PDL-1	42	0	2.93616	0
P-0006268	Samstein et al.(PMID 30643254)	71	Male		Non-Small Cell Lung Cancer	PD-1/PDL-1	12	1	1.95744	0
P-0006270	Samstein et al.(PMID 30643254)	73	Female		Bladder Cancer	PD-1/PDL-1	9	1	2.93616	0
P-0006281	Samstein et al.(PMID 30643254)	75	Male		Bladder Cancer	Combo	28	0	24.468	0
P-0006282	Samstein et al.(PMID 30643254)	61	Male		Renal Cell Carcinoma	PD-1/PDL-1	3	1	2.93616	0
P-0006294	Samstein et al.(PMID 30643254)	63	Female		Non-Small Cell Lung Cancer	PD-1/PDL-1	15	1	3.91488	0
P-0006318	Samstein et al.(PMID 30643254)	25	Female		Esophagogastric Cancer	PD-1/PDL-1	0	1	0.97872	0
P-0006321	Samstein et al.(PMID 30643254)	64	Male		Non-Small Cell Lung Cancer	PD-1/PDL-1	0	1	2.93616	0
P-0006330	Samstein et al.(PMID 30643254)	45	Male		Cancer of Unknown Primary	PD-1/PDL-1	7	1	1.95744	0
P-0006334	Samstein et al.(PMID 30643254)	53	Female		Renal Cell Carcinoma	PD-1/PDL-1	38	0	2.93616	0
P-0006339	Samstein et al.(PMID 30643254)	64	Female		Melanoma	PD-1/PDL-1	1	0	63.6168	0
P-0006343	Samstein et al.(PMID 30643254)	61	Female		Non-Small Cell Lung Cancer	PD-1/PDL-1	28	0	5.87232	0
P-0006381	Samstein et al.(PMID 30643254)	63	Male		Renal Cell Carcinoma	PD-1/PDL-1	24	1	1.95744	0
P-0006392	Samstein et al.(PMID 30643254)	72	Male		Renal Cell Carcinoma	PD-1/PDL-1	25	0	3.91488	0
P-0006414	Samstein et al.(PMID 30643254)	70	Female		Esophagogastric Cancer	PD-1/PDL-1	19	0	6.85104	1
P-0006415	Samstein et al.(PMID 30643254)	85	Male		Non-Small Cell Lung Cancer	PD-1/PDL-1	12	1	4.8936	0
P-0006416	Samstein et al.(PMID 30643254)	64	Male		Glioma	PD-1/PDL-1	22	1	1.95744	0
P-0006428	Samstein et al.(PMID 30643254)	21	Female		Glioma	PD-1/PDL-1	2	1	6.85104	0
P-0006439	Samstein et al.(PMID 30643254)	60	Male		Head and Neck Cancer	PD-1/PDL-1	2	0	4.8936	0
P-0006441	Samstein et al.(PMID 30643254)	57	Male		Glioma	PD-1/PDL-1	8	1	3.91488	0
P-0006467	Samstein et al.(PMID 30643254)	73	Male		Melanoma	Combo	29	0	2.93616	0
P-0006476	Samstein et al.(PMID 30643254)	43	Male		Melanoma	CTLA4	58	1	11.7446	0
P-0006488	Samstein et al.(PMID 30643254)	73	Female		Melanoma	Combo	50	0	7.82976	0
P-0006498	Samstein et al.(PMID 30643254)	60	Male		Renal Cell Carcinoma	PD-1/PDL-1	33	1	0	0
P-0006500	Samstein et al.(PMID 30643254)	57	Male		Glioma	PD-1/PDL-1	5	1	4.8936	0
P-0006503	Samstein et al.(PMID 30643254)	59	Male		Renal Cell Carcinoma	Combo	27	1	4.8936	0
P-0006510	Samstein et al.(PMID 30643254)	69	Female		Renal Cell Carcinoma	PD-1/PDL-1	43	0	17.617	0
P-0006516	Samstein et al.(PMID 30643254)	73	Male		Non-Small Cell Lung Cancer	PD-1/PDL-1	1	1	1.95744	0
P-0006525	Samstein et al.(PMID 30643254)	66	Female		Head and Neck Cancer	PD-1/PDL-1	2	1	3.91488	0
P-0006528	Samstein et al.(PMID 30643254)	66	Female		Cancer of Unknown Primary	PD-1/PDL-1	1	1	6.85104	0
P-0006535	Samstein et al.(PMID 30643254)	57	Female		Bladder Cancer	PD-1/PDL-1	19	1	4.8936	0
P-0006539	Samstein et al.(PMID 30643254)	44	Male		Renal Cell Carcinoma	Combo	21	1	4.8936	0
P-0006541	Samstein et al.(PMID 30643254)	81	Male		Melanoma	PD-1/PDL-1	47	1	33.2765	0
P-0006542	Samstein et al.(PMID 30643254)	72	Male		Renal Cell Carcinoma	Combo	32	0	9.7872	0
P-0006545	Samstein et al.(PMID 30643254)	25	Male		Glioma	PD-1/PDL-1	4	1	4.8936	0
P-0006546	Samstein et al.(PMID 30643254)	29	Male		Glioma	PD-1/PDL-1	32	0	6.85104	0
P-0006550	Samstein et al.(PMID 30643254)	47	Male		Renal Cell Carcinoma	PD-1/PDL-1	39	0	1.95744	0
P-0006557	Samstein et al.(PMID 30643254)	71	Male		Renal Cell Carcinoma	PD-1/PDL-1	30	0	8.80848	0
P-0006570	Samstein et al.(PMID 30643254)	61	Male		Bladder Cancer	PD-1/PDL-1	11	1	2.93616	0
P-0006572	Samstein et al.(PMID 30643254)	73	Male		Non-Small Cell Lung Cancer	PD-1/PDL-1	20	0	0	0
P-0006582	Samstein et al.(PMID 30643254)	72	Female		Non-Small Cell Lung Cancer	PD-1/PDL-1	19	0	4.8936	0
P-0006586	Samstein et al.(PMID 30643254)	64	Male		Renal Cell Carcinoma	PD-1/PDL-1	11	1	3.91488	0
P-0006587	Samstein et al.(PMID 30643254)	51	Male		Colorectal Cancer	PD-1/PDL-1	9	0	10.7659	0
P-0006628	Samstein et al.(PMID 30643254)	65	Male		Bladder Cancer	PD-1/PDL-1	19	0	3.91488	0
P-0006639	Samstein et al.(PMID 30643254)	63	Male		Renal Cell Carcinoma	PD-1/PDL-1	44	0	2.93616	0
P-0006641	Samstein et al.(PMID 30643254)	75	Female		Head and Neck Cancer	PD-1/PDL-1	9	1	4.8936	0
P-0006642	Samstein et al.(PMID 30643254)	67	Female		Non-Small Cell Lung Cancer	PD-1/PDL-1	14	1	20.5531	0
P-0006653	Samstein et al.(PMID 30643254)	62	Female		Renal Cell Carcinoma	PD-1/PDL-1	36	1	4.8936	0
P-0006667	Samstein et al.(PMID 30643254)	58	Male		Glioma	PD-1/PDL-1	5	1	2.93616	0
P-0006672	Samstein et al.(PMID 30643254)	45	Male		Glioma	PD-1/PDL-1	7	1	4.8936	0
P-0006674	Samstein et al.(PMID 30643254)	66	Female		Non-Small Cell Lung Cancer	PD-1/PDL-1	7	1	16.6382	0
P-0006708	Samstein et al.(PMID 30643254)	34	Female		Colorectal Cancer	PD-1/PDL-1	4	1	9.7872	0
P-0006713	Samstein et al.(PMID 30643254)	52	Female		Non-Small Cell Lung Cancer	PD-1/PDL-1	23	0	45.0211	0
P-0006719	Samstein et al.(PMID 30643254)	90	Female		Melanoma	PD-1/PDL-1	28	0	38.1701	0
P-0006724	Samstein et al.(PMID 30643254)	48	Female		Non-Small Cell Lung Cancer	PD-1/PDL-1	18	0	23.4893	0
P-0006728	Samstein et al.(PMID 30643254)	76	Female		Non-Small Cell Lung Cancer	PD-1/PDL-1	3	1	13.7021	0
P-0006731	Samstein et al.(PMID 30643254)	52	Female		Melanoma	Combo	29	0	14.6808	0
P-0006735	Samstein et al.(PMID 30643254)	71	Male		Colorectal Cancer	PD-1/PDL-1	20	0	3.91488	0
P-0006738	Samstein et al.(PMID 30643254)	56	Male		Renal Cell Carcinoma	PD-1/PDL-1	18	0	3.91488	0
P-0006743	Samstein et al.(PMID 30643254)	34	Female		Colorectal Cancer	PD-1/PDL-1	2	0	5.87232	0
P-0006746	Samstein et al.(PMID 30643254)	16	Female		Renal Cell Carcinoma	PD-1/PDL-1	7	1	0	0
P-0006762	Samstein et al.(PMID 30643254)	64	Female		Renal Cell Carcinoma	PD-1/PDL-1	68	1	3.91488	0
P-0006765	Samstein et al.(PMID 30643254)	54	Female		Cancer of Unknown Primary	PD-1/PDL-1	2	1	3.91488	0
P-0006768	Samstein et al.(PMID 30643254)	66	Male		Non-Small Cell Lung Cancer	PD-1/PDL-1	16	0	7.82976	0
P-0006773	Samstein et al.(PMID 30643254)	67	Female		Melanoma	PD-1/PDL-1	9	1	4.8936	0
P-0006800	Samstein et al.(PMID 30643254)	80	Male		Bladder Cancer	PD-1/PDL-1	7	1	7.82976	0
P-0006826	Samstein et al.(PMID 30643254)	58	Male		Head and Neck Cancer	PD-1/PDL-1	28	1	4.8936	0
P-0006842	Samstein et al.(PMID 30643254)	44	Female		Breast Cancer	Combo	9	1	5.87232	0
P-0006845	Samstein et al.(PMID 30643254)	64	Male		Melanoma	PD-1/PDL-1	29	0	5.87232	0
P-0006848	Samstein et al.(PMID 30643254)	53	Female		Glioma	PD-1/PDL-1	10	1	5.87232	0
P-0006869	Samstein et al.(PMID 30643254)	70	Male		Esophagogastric Cancer	PD-1/PDL-1	4	1	1.95744	0
P-0006895	Samstein et al.(PMID 30643254)	65	Male		Non-Small Cell Lung Cancer	PD-1/PDL-1	19	0	36.2126	0
P-0006904	Samstein et al.(PMID 30643254)	52	Male		Renal Cell Carcinoma	PD-1/PDL-1	78	0	1.95744	0
P-0006911	Samstein et al.(PMID 30643254)	40	Male		Esophagogastric Cancer	PD-1/PDL-1	1	1	0	0
P-0006933	Samstein et al.(PMID 30643254)	56	Female		Colorectal Cancer	PD-1/PDL-1	14	1	4.8936	0
P-0006934	Samstein et al.(PMID 30643254)	63	Male		Bladder Cancer	PD-1/PDL-1	20	0	4.8936	0
P-0006935	Samstein et al.(PMID 30643254)	48	Male		Renal Cell Carcinoma	PD-1/PDL-1	30	1	2.93616	0
P-0006946	Samstein et al.(PMID 30643254)	51	Male		Melanoma	CTLA4	13	1	2.93616	0
P-0006952	Samstein et al.(PMID 30643254)	49	Male		Melanoma	CTLA4	69	0	17.617	0
P-0006954	Samstein et al.(PMID 30643254)	67	Female		Non-Small Cell Lung Cancer	PD-1/PDL-1	3	1	7.82976	0
P-0006959	Samstein et al.(PMID 30643254)	53	Male		Renal Cell Carcinoma	Combo	30	0	1.95744	0
P-0006970	Samstein et al.(PMID 30643254)	48	Male		Glioma	PD-1/PDL-1	12	1	4.8936	0
P-0006971	Samstein et al.(PMID 30643254)	62	Male		Melanoma	CTLA4	13	1	1.95744	0
P-0006973	Samstein et al.(PMID 30643254)	52	Male		Melanoma	PD-1/PDL-1	61	0	10.7659	0
P-0006993	Samstein et al.(PMID 30643254)	68	Male		Non-Small Cell Lung Cancer	PD-1/PDL-1	3	1	7.82976	0
P-0007010	Samstein et al.(PMID 30643254)	17	Male		Glioma	PD-1/PDL-1	5	1	0.97872	0
P-0007014	Samstein et al.(PMID 30643254)	44	Female		Breast Cancer	CTLA4	5	1	2.93616	0
P-0007051	Samstein et al.(PMID 30643254)	71	Male		Non-Small Cell Lung Cancer	PD-1/PDL-1	2	1	13.7021	0
P-0007061	Samstein et al.(PMID 30643254)	64	Female		Melanoma	Combo	28	0	1.95744	0
P-0007068	Samstein et al.(PMID 30643254)	65	Male		Non-Small Cell Lung Cancer	PD-1/PDL-1	6	1	8.80848	0
P-0007081	Samstein et al.(PMID 30643254)	49	Male		Colorectal Cancer	PD-1/PDL-1	3	1	2.93616	0
P-0007083	Samstein et al.(PMID 30643254)	76	Male		Non-Small Cell Lung Cancer	PD-1/PDL-1	12	1	12.9705	0
P-0007088	Samstein et al.(PMID 30643254)	45	Female		Non-Small Cell Lung Cancer	PD-1/PDL-1	32	1	4.8936	0
P-0007090	Samstein et al.(PMID 30643254)	52	Male		Colorectal Cancer	PD-1/PDL-1	13	1	4.8936	0
P-0007099	Samstein et al.(PMID 30643254)	78	Female		Non-Small Cell Lung Cancer	PD-1/PDL-1	1	1	10.7659	0
P-0007101	Samstein et al.(PMID 30643254)	76	Male		Non-Small Cell Lung Cancer	PD-1/PDL-1	6	1	11.7446	0
P-0007104	Samstein et al.(PMID 30643254)	70	Male		Glioma	PD-1/PDL-1	15	0	3.91488	0
P-0007114	Samstein et al.(PMID 30643254)	77	Male		Non-Small Cell Lung Cancer	PD-1/PDL-1	1	1	8.80848	0
P-0007118	Samstein et al.(PMID 30643254)	59	Female		Esophagogastric Cancer	PD-1/PDL-1	1	0	6.85104	0
P-0007119	Samstein et al.(PMID 30643254)	61	Male		Non-Small Cell Lung Cancer	PD-1/PDL-1	21	0	22.5106	0
P-0007121	Samstein et al.(PMID 30643254)	59	Female		Non-Small Cell Lung Cancer	PD-1/PDL-1	17	0	7.82976	0
P-0007123	Samstein et al.(PMID 30643254)	67	Female		Non-Small Cell Lung Cancer	PD-1/PDL-1	24	0	8.80848	0
P-0007124	Samstein et al.(PMID 30643254)	41	Male		Glioma	PD-1/PDL-1	2	1	4.8936	0
P-0007127	Samstein et al.(PMID 30643254)	73	Female		Breast Cancer	CTLA4	15	1	3.91488	0
P-0007142	Samstein et al.(PMID 30643254)	60	Male		Melanoma	PD-1/PDL-1	28	0	4.8936	0
P-0007210	Samstein et al.(PMID 30643254)	68	Female		Renal Cell Carcinoma	PD-1/PDL-1	4	1	2.93616	0
P-0007220	Samstein et al.(PMID 30643254)	67	Male		Head and Neck Cancer	PD-1/PDL-1	15	0	9.7872	0
P-0007232	Samstein et al.(PMID 30643254)	57	Male		Melanoma	PD-1/PDL-1	10	0	0	0
P-0007235	Samstein et al.(PMID 30643254)	72	Female		Melanoma	Combo	9	1	8.80848	0
P-0007238	Samstein et al.(PMID 30643254)	30	Male		Melanoma	PD-1/PDL-1	28	0	1.95744	0
P-0007274	Samstein et al.(PMID 30643254)	55	Male		Bladder Cancer	PD-1/PDL-1	6	0	2.93616	0
P-0007278	Samstein et al.(PMID 30643254)	57	Female		Non-Small Cell Lung Cancer	PD-1/PDL-1	8	1	7.82976	0
P-0007281	Samstein et al.(PMID 30643254)	82	Male		Melanoma	PD-1/PDL-1	6	1	11.7446	0
P-0007293	Samstein et al.(PMID 30643254)	85	Female		Melanoma	PD-1/PDL-1	29	0	5.87232	0
P-0007310	Samstein et al.(PMID 30643254)	46	Female		Renal Cell Carcinoma	Combo	31	0	8.80848	0
P-0007314	Samstein et al.(PMID 30643254)	42	Male		Glioma	PD-1/PDL-1	9	1	0	0
P-0007349	Samstein et al.(PMID 30643254)	32	Female		Breast Cancer	CTLA4	14	1	4.8936	0
P-0007384	Samstein et al.(PMID 30643254)	50	Male		Head and Neck Cancer	Combo	12	1	4.8936	0
P-0007388	Samstein et al.(PMID 30643254)	31	Female		Head and Neck Cancer	PD-1/PDL-1	15	1	10.7659	0
P-0007399	Samstein et al.(PMID 30643254)	66	Male		Renal Cell Carcinoma	Combo	28	0	2.93616	0
P-0007405	Samstein et al.(PMID 30643254)	57	Male		Colorectal Cancer	PD-1/PDL-1	30	0	6.85104	0
P-0007407	Samstein et al.(PMID 30643254)	65	Male		Head and Neck Cancer	PD-1/PDL-1	11	1	11.7446	0
P-0007410	Samstein et al.(PMID 30643254)	38	Male		Colorectal Cancer	PD-1/PDL-1	29	0	1.95744	0
P-0007418	Samstein et al.(PMID 30643254)	57	Female		Non-Small Cell Lung Cancer	PD-1/PDL-1	22	0	16.6382	0
P-0007420	Samstein et al.(PMID 30643254)	85	Female		Non-Small Cell Lung Cancer	PD-1/PDL-1	8	1	3.91488	0
P-0007421	Samstein et al.(PMID 30643254)	64	Male		Bladder Cancer	PD-1/PDL-1	27	0	1.95744	0
P-0007484	Samstein et al.(PMID 30643254)	51	Female		Bladder Cancer	PD-1/PDL-1	7	0	5.87232	0
P-0007486	Samstein et al.(PMID 30643254)	55	Female		Colorectal Cancer	PD-1/PDL-1	2	1	5.87232	0
P-0007493	Samstein et al.(PMID 30643254)	75	Male		Non-Small Cell Lung Cancer	PD-1/PDL-1	13	0	18.5957	0
P-0007495	Samstein et al.(PMID 30643254)	81	Male		Colorectal Cancer	PD-1/PDL-1	5	0	13.7021	0
P-0007504	Samstein et al.(PMID 30643254)	50	Male		Glioma	PD-1/PDL-1	16	1	1.95744	0
P-0007514	Samstein et al.(PMID 30643254)	73	Female		Non-Small Cell Lung Cancer	PD-1/PDL-1	2	1	3.91488	0
P-0007517	Samstein et al.(PMID 30643254)	73	Male		Melanoma	Combo	4	1	6.85104	0
P-0007525	Samstein et al.(PMID 30643254)	65	Female		Non-Small Cell Lung Cancer	PD-1/PDL-1	2	1	4.8936	0
P-0007531	Samstein et al.(PMID 30643254)	38	Female		Esophagogastric Cancer	PD-1/PDL-1	27	1	8.80848	0
P-0007540	Samstein et al.(PMID 30643254)	58	Female		Renal Cell Carcinoma	PD-1/PDL-1	19	0	5.87232	0
P-0007543	Samstein et al.(PMID 30643254)	67	Male		Head and Neck Cancer	PD-1/PDL-1	11	0	3.91488	0
P-0007556	Samstein et al.(PMID 30643254)	55	Male		Renal Cell Carcinoma	Combo	29	0	8.80848	0
P-0007561	Samstein et al.(PMID 30643254)	36	Female		Melanoma	Combo	0	1	33.2765	1
P-0007567	Samstein et al.(PMID 30643254)	56	Male		Colorectal Cancer	Combo	7	0	7.82976	0
P-0007575	Samstein et al.(PMID 30643254)	65	Male		Head and Neck Cancer	PD-1/PDL-1	4	1	5.87232	1
P-0007580	Samstein et al.(PMID 30643254)	63	Female		Non-Small Cell Lung Cancer	PD-1/PDL-1	10	1	2.93616	0
P-0007582	Samstein et al.(PMID 30643254)	83	Male		Non-Small Cell Lung Cancer	PD-1/PDL-1	3	1	4.8936	0
P-0007583	Samstein et al.(PMID 30643254)	70	Female		Non-Small Cell Lung Cancer	PD-1/PDL-1	7	1	13.7021	0
P-0007597	Samstein et al.(PMID 30643254)	73	Male		Non-Small Cell Lung Cancer	PD-1/PDL-1	5	1	15.6595	0
P-0007619	Samstein et al.(PMID 30643254)	78	Male		Non-Small Cell Lung Cancer	PD-1/PDL-1	1	1	9.7872	0
P-0007620	Samstein et al.(PMID 30643254)	54	Male		Head and Neck Cancer	PD-1/PDL-1	32	0	5.87232	1
P-0007622	Samstein et al.(PMID 30643254)	53	Male		Head and Neck Cancer	Combo	2	1	5.87232	0
P-0007633	Samstein et al.(PMID 30643254)	79	Male		Non-Small Cell Lung Cancer	Combo	48	0	2.93616	0
P-0007656	Samstein et al.(PMID 30643254)	57	Male		Bladder Cancer	PD-1/PDL-1	18	0	13.7021	0
P-0007674	Samstein et al.(PMID 30643254)	77	Male		Esophagogastric Cancer	PD-1/PDL-1	7	1	0	0
P-0007693	Samstein et al.(PMID 30643254)	55	Male		Glioma	PD-1/PDL-1	17	1	5.87232	0
P-0007736	Samstein et al.(PMID 30643254)	33	Female		Melanoma	CTLA4	71	0	11.7446	0
P-0007748	Samstein et al.(PMID 30643254)	45	Male		Esophagogastric Cancer	Combo	2	1	1.95744	0
P-0007771	Samstein et al.(PMID 30643254)	59	Female		Colorectal Cancer	PD-1/PDL-1	5	1	4.8936	0
P-0007806	Samstein et al.(PMID 30643254)	53	Female		Renal Cell Carcinoma	Combo	18	1	2.93616	0
P-0007810	Samstein et al.(PMID 30643254)	70	Male		Melanoma	PD-1/PDL-1	27	0	42.0849	0
P-0007834	Samstein et al.(PMID 30643254)	63	Female		Renal Cell Carcinoma	PD-1/PDL-1	23	0	6.85104	0
P-0007839	Samstein et al.(PMID 30643254)	54	Male		Head and Neck Cancer	PD-1/PDL-1	11	1	1.95744	0
P-0007845	Samstein et al.(PMID 30643254)	59	Male		Esophagogastric Cancer	PD-1/PDL-1	4	0	1.95744	0
P-0007861	Samstein et al.(PMID 30643254)	77	Female		Non-Small Cell Lung Cancer	PD-1/PDL-1	12	1	2.93616	0
P-0007876	Samstein et al.(PMID 30643254)	72	Female		Melanoma	PD-1/PDL-1	12	0	36.2126	0
P-0007879	Samstein et al.(PMID 30643254)	70	Female		Non-Small Cell Lung Cancer	PD-1/PDL-1	31	0	9.7872	0
P-0007895	Samstein et al.(PMID 30643254)	37	Male		Esophagogastric Cancer	Combo	1	1	3.91488	0
P-0007916	Samstein et al.(PMID 30643254)	69	Male		Non-Small Cell Lung Cancer	PD-1/PDL-1	22	0	14.6808	0
P-0007917	Samstein et al.(PMID 30643254)	60	Male		Glioma	PD-1/PDL-1	12	1	2.93616	0
P-0007918	Samstein et al.(PMID 30643254)	71	Male		Melanoma	Combo	1	1	55.787	0
P-0007925	Samstein et al.(PMID 30643254)	55	Male		Head and Neck Cancer	Combo	5	1	3.91488	0
P-0007927	Samstein et al.(PMID 30643254)	60	Male		Melanoma	PD-1/PDL-1	4	1	0.97872	0
P-0007961	Samstein et al.(PMID 30643254)	63	Male		Renal Cell Carcinoma	PD-1/PDL-1	23	1	7.82976	1
P-0007970	Samstein et al.(PMID 30643254)	55	Male		Melanoma	Combo	3	0	11.7446	0
P-0007971	Samstein et al.(PMID 30643254)	71	Male		Head and Neck Cancer	PD-1/PDL-1	29	1	5.87232	0
P-0007977	Samstein et al.(PMID 30643254)	70	Female		Non-Small Cell Lung Cancer	PD-1/PDL-1	3	1	5.87232	0
P-0007978	Samstein et al.(PMID 30643254)	50	Female		Non-Small Cell Lung Cancer	PD-1/PDL-1	6	1	10.7659	0
P-0007995	Samstein et al.(PMID 30643254)	54	Female		Esophagogastric Cancer	PD-1/PDL-1	35	0	29.3616	0
P-0007997	Samstein et al.(PMID 30643254)	59	Female		Colorectal Cancer	PD-1/PDL-1	1	1	51.8721	0
P-0008004	Samstein et al.(PMID 30643254)	70	Female		Esophagogastric Cancer	PD-1/PDL-1	4	1	1.95744	0
P-0008005	Samstein et al.(PMID 30643254)	45	Male		Renal Cell Carcinoma	PD-1/PDL-1	27	0	3.91488	0
P-0008009	Samstein et al.(PMID 30643254)	60	Male		Melanoma	Combo	24	0	8.80848	0
P-0008033	Samstein et al.(PMID 30643254)	66	Male		Head and Neck Cancer	PD-1/PDL-1	8	1	3.91488	0
P-0008036	Samstein et al.(PMID 30643254)	79	Female		Head and Neck Cancer	Combo	2	1	3.91488	0
P-0008050	Samstein et al.(PMID 30643254)	55	Male		Melanoma	PD-1/PDL-1	15	0	0.97872	0
P-0008053	Samstein et al.(PMID 30643254)	56	Male		Renal Cell Carcinoma	Combo	27	0	2.93616	0
P-0008061	Samstein et al.(PMID 30643254)	68	Male		Renal Cell Carcinoma	PD-1/PDL-1	1	1	8.80848	0
P-0008062	Samstein et al.(PMID 30643254)	74	Female		Bladder Cancer	PD-1/PDL-1	18	0	6.85104	1
P-0008080	Samstein et al.(PMID 30643254)	77	Male		Melanoma	CTLA4	39	0	46.9785	1
P-0008137	Samstein et al.(PMID 30643254)	54	Male		Renal Cell Carcinoma	Combo	33	0	2.93616	0
P-0008161	Samstein et al.(PMID 30643254)	82	Male		Non-Small Cell Lung Cancer	PD-1/PDL-1	3	0	4.8936	0
P-0008166	Samstein et al.(PMID 30643254)	64	Male		Glioma	PD-1/PDL-1	16	1	2.93616	0
P-0008168	Samstein et al.(PMID 30643254)	78	Male		Bladder Cancer	PD-1/PDL-1	4	0	6.85104	0
P-0008169	Samstein et al.(PMID 30643254)	53	Female		Head and Neck Cancer	PD-1/PDL-1	6	1	6.85104	0
P-0008176	Samstein et al.(PMID 30643254)	72	Female		Non-Small Cell Lung Cancer	PD-1/PDL-1	23	0	3.91488	0
P-0008187	Samstein et al.(PMID 30643254)	66	Male		Esophagogastric Cancer	PD-1/PDL-1	11	0	5.87232	0
P-0008188	Samstein et al.(PMID 30643254)	72	Female		Esophagogastric Cancer	PD-1/PDL-1	5	1	46.9785	0
P-0008228	Samstein et al.(PMID 30643254)	80	Male		Melanoma	PD-1/PDL-1	28	0	43.0637	0
P-0008239	Samstein et al.(PMID 30643254)	74	Female		Non-Small Cell Lung Cancer	PD-1/PDL-1	15	1	15.6595	0
P-0008248	Samstein et al.(PMID 30643254)	41	Male		Head and Neck Cancer	PD-1/PDL-1	2	1	11.7446	0
P-0008249	Samstein et al.(PMID 30643254)	69	Male		Renal Cell Carcinoma	PD-1/PDL-1	24	0	2.93616	0
P-0008257	Samstein et al.(PMID 30643254)	66	Male		Glioma	PD-1/PDL-1	10	1	6.85104	0
P-0008258	Samstein et al.(PMID 30643254)	57	Female		Glioma	PD-1/PDL-1	2	1	2.93616	0
P-0008290	Samstein et al.(PMID 30643254)	75	Male		Bladder Cancer	PD-1/PDL-1	23	0	6.85104	0
P-0008295	Samstein et al.(PMID 30643254)	58	Male		Non-Small Cell Lung Cancer	PD-1/PDL-1	14	0	5.87232	0
P-0008305	Samstein et al.(PMID 30643254)	40	Male		Esophagogastric Cancer	PD-1/PDL-1	1	1	2.93616	0
P-0008322	Samstein et al.(PMID 30643254)	67	Male		Non-Small Cell Lung Cancer	PD-1/PDL-1	29	0	2.93616	0
P-0008323	Samstein et al.(PMID 30643254)	74	Male		Head and Neck Cancer	PD-1/PDL-1	4	1	0	0
P-0008328	Samstein et al.(PMID 30643254)	34	Female		Head and Neck Cancer	PD-1/PDL-1	25	1	10.7659	0
P-0008332	Samstein et al.(PMID 30643254)	57	Female		Non-Small Cell Lung Cancer	PD-1/PDL-1	26	0	3.91488	0
P-0008340	Samstein et al.(PMID 30643254)	50	Female		Renal Cell Carcinoma	PD-1/PDL-1	5	1	3.91488	0
P-0008353	Samstein et al.(PMID 30643254)	77	Male		Head and Neck Cancer	PD-1/PDL-1	8	1	24.468	0
P-0008375	Samstein et al.(PMID 30643254)	54	Female		Melanoma	Combo	1	1	9.7872	0
P-0008380	Samstein et al.(PMID 30643254)	45	Male		Glioma	PD-1/PDL-1	10	1	1.95744	0
P-0008382	Samstein et al.(PMID 30643254)	35	Male		Glioma	PD-1/PDL-1	0	1	8.80848	0
P-0008399	Samstein et al.(PMID 30643254)	64	Female		Renal Cell Carcinoma	Combo	34	1	4.8936	0
P-0008403	Samstein et al.(PMID 30643254)	50	Male		Melanoma	Combo	24	0	20.5531	0
P-0008425	Samstein et al.(PMID 30643254)	69	Male		Bladder Cancer	PD-1/PDL-1	7	1	5.87232	0
P-0008434	Samstein et al.(PMID 30643254)	51	Female		Melanoma	PD-1/PDL-1	23	0	50.8934	0
P-0008438	Samstein et al.(PMID 30643254)	63	Male		Non-Small Cell Lung Cancer	PD-1/PDL-1	0	0	2.93616	0
P-0008439	Samstein et al.(PMID 30643254)	82	Female		Bladder Cancer	PD-1/PDL-1	6	1	18.5957	0
P-0008442	Samstein et al.(PMID 30643254)	65	Female		Non-Small Cell Lung Cancer	PD-1/PDL-1	11	1	4.8936	0
P-0008445	Samstein et al.(PMID 30643254)	50	Male		Melanoma	Combo	18	0	5.87232	0
P-0008459	Samstein et al.(PMID 30643254)	53	Male		Renal Cell Carcinoma	Combo	29	0	0.97872	0
P-0008490	Samstein et al.(PMID 30643254)	67	Female		Melanoma	PD-1/PDL-1	24	0	5.87232	0
P-0008492	Samstein et al.(PMID 30643254)	28	Male		Melanoma	Combo	14	1	2.93616	0
P-0008518	Samstein et al.(PMID 30643254)	73	Male		Head and Neck Cancer	PD-1/PDL-1	2	1	0.97872	0
P-0008522	Samstein et al.(PMID 30643254)	63	Female		Renal Cell Carcinoma	PD-1/PDL-1	16	1	7.82976	0
P-0008528	Samstein et al.(PMID 30643254)	66	Male		Head and Neck Cancer	Combo	5	1	7.82976	0
P-0008532	Samstein et al.(PMID 30643254)	71	Male		Bladder Cancer	PD-1/PDL-1	9	1	2.93616	0
P-0008537	Samstein et al.(PMID 30643254)	69	Male		Renal Cell Carcinoma	PD-1/PDL-1	3	1	0	0
P-0008571	Samstein et al.(PMID 30643254)	50	Female		Breast Cancer	PD-1/PDL-1	15	0	1.95744	0
P-0008575	Samstein et al.(PMID 30643254)	67	Male		Bladder Cancer	PD-1/PDL-1	11	1	1.95744	0
P-0008595	Samstein et al.(PMID 30643254)	78	Female		Bladder Cancer	PD-1/PDL-1	24	0	20.5531	0
P-0008651	Samstein et al.(PMID 30643254)	55	Female		Colorectal Cancer	PD-1/PDL-1	15	0	6.85104	0
P-0008659	Samstein et al.(PMID 30643254)	65	Male		Melanoma	PD-1/PDL-1	8	1	8.80848	0
P-0008662	Samstein et al.(PMID 30643254)	72	Female		Colorectal Cancer	PD-1/PDL-1	9	0	1.95744	0
P-0008678	Samstein et al.(PMID 30643254)	73	Female		Non-Small Cell Lung Cancer	PD-1/PDL-1	25	0	7.82976	0
P-0008718	Samstein et al.(PMID 30643254)	52	Male		Bladder Cancer	PD-1/PDL-1	8	0	10.7659	0
P-0008728	Samstein et al.(PMID 30643254)	57	Female		Melanoma	Combo	25	0	44.0424	1
P-0008733	Samstein et al.(PMID 30643254)	72	Male		Melanoma	PD-1/PDL-1	12	1	7.82976	0
P-0008746	Samstein et al.(PMID 30643254)	68	Female		Colorectal Cancer	PD-1/PDL-1	11	0	47.9573	0
P-0008765	Samstein et al.(PMID 30643254)	60	Male		Non-Small Cell Lung Cancer	PD-1/PDL-1	3	0	7.82976	0
P-0008772	Samstein et al.(PMID 30643254)	65	Male		Renal Cell Carcinoma	PD-1/PDL-1	21	0	2.93616	0
P-0008784	Samstein et al.(PMID 30643254)	70	Female		Melanoma	PD-1/PDL-1	8	1	8.80848	0
P-0008785	Samstein et al.(PMID 30643254)	53	Female		Renal Cell Carcinoma	PD-1/PDL-1	11	1	3.91488	0
P-0008786	Samstein et al.(PMID 30643254)	65	Male		Non-Small Cell Lung Cancer	PD-1/PDL-1	24	0	4.8936	0
P-0008792	Samstein et al.(PMID 30643254)	70	Male		Head and Neck Cancer	PD-1/PDL-1	21	0	10.7659	0
P-0008798	Samstein et al.(PMID 30643254)	41	Male		Head and Neck Cancer	PD-1/PDL-1	3	1	0.97872	0
P-0008800	Samstein et al.(PMID 30643254)	59	Male		Head and Neck Cancer	PD-1/PDL-1	5	1	2.93616	0
P-0008816	Samstein et al.(PMID 30643254)	52	Female		Bladder Cancer	PD-1/PDL-1	3	1	0.97872	0
P-0008830	Samstein et al.(PMID 30643254)	58	Male		Renal Cell Carcinoma	PD-1/PDL-1	21	0	1.95744	0
P-0008841	Samstein et al.(PMID 30643254)	68	Female		Colorectal Cancer	PD-1/PDL-1	16	0	3.91488	0
P-0008848	Samstein et al.(PMID 30643254)	76	Male		Non-Small Cell Lung Cancer	PD-1/PDL-1	5	1	5.87232	0
P-0008851	Samstein et al.(PMID 30643254)	63	Male		Non-Small Cell Lung Cancer	PD-1/PDL-1	3	1	7.82976	0
P-0008857	Samstein et al.(PMID 30643254)	74	Female		Melanoma	PD-1/PDL-1	24	0	49.9147	0
P-0008870	Samstein et al.(PMID 30643254)	76	Female		Melanoma	PD-1/PDL-1	19	0	0.97872	0
P-0008874	Samstein et al.(PMID 30643254)	58	Male		Non-Small Cell Lung Cancer	PD-1/PDL-1	1	1	10.7659	0
P-0008904	Samstein et al.(PMID 30643254)	31	Female		Melanoma	Combo	11	1	1.95744	0
P-0008912	Samstein et al.(PMID 30643254)	28	Female		Melanoma	Combo	1	1	15.6595	0
P-0008922	Samstein et al.(PMID 30643254)	67	Male		Non-Small Cell Lung Cancer	PD-1/PDL-1	1	1	2.93616	0
P-0008935	Samstein et al.(PMID 30643254)	75	Female		Non-Small Cell Lung Cancer	PD-1/PDL-1	5	1	10.7659	0
P-0008939	Samstein et al.(PMID 30643254)	77	Female		Glioma	PD-1/PDL-1	15	1	2.93616	0
P-0008942	Samstein et al.(PMID 30643254)	68	Male		Melanoma	Combo	25	0	33.2765	0
P-0008944	Samstein et al.(PMID 30643254)	47	Female		Non-Small Cell Lung Cancer	PD-1/PDL-1	11	1	10.7659	0
P-0008946	Samstein et al.(PMID 30643254)	87	Female		Melanoma	PD-1/PDL-1	23	0	15.6595	0
P-0008963	Samstein et al.(PMID 30643254)	46	Male		Melanoma	CTLA4	44	0	8.80848	0
P-0008964	Samstein et al.(PMID 30643254)	57	Male		Renal Cell Carcinoma	PD-1/PDL-1	21	0	0.97872	0
P-0008974	Samstein et al.(PMID 30643254)	86	Male		Melanoma	PD-1/PDL-1	4	1	34.2552	0
P-0008997	Samstein et al.(PMID 30643254)	56	Female		Melanoma	Combo	23	0	63.6168	0
P-0008999	Samstein et al.(PMID 30643254)	53	Male		Melanoma	Combo	6	1	10.7659	0
P-0009005	Samstein et al.(PMID 30643254)	72	Male		Bladder Cancer	PD-1/PDL-1	4	1	10.7659	0
P-0009017	Samstein et al.(PMID 30643254)	77	Male		Non-Small Cell Lung Cancer	PD-1/PDL-1	10	0	33.2765	0
P-0009019	Samstein et al.(PMID 30643254)	68	Male		Melanoma	PD-1/PDL-1	13	1	2.93616	0
P-0009020	Samstein et al.(PMID 30643254)	74	Female		Non-Small Cell Lung Cancer	PD-1/PDL-1	8	1	12.7234	0
P-0009057	Samstein et al.(PMID 30643254)	71	Female		Esophagogastric Cancer	PD-1/PDL-1	10	1	42.0849	0
P-0009066	Samstein et al.(PMID 30643254)	51	Male		Esophagogastric Cancer	PD-1/PDL-1	5	1	9.7872	0
P-0009068	Samstein et al.(PMID 30643254)	74	Female		Non-Small Cell Lung Cancer	PD-1/PDL-1	22	0	19.5744	0
P-0009072	Samstein et al.(PMID 30643254)	56	Male		Melanoma	Combo	24	0	3.91488	0
P-0009074	Samstein et al.(PMID 30643254)	66	Female		Melanoma	Combo	14	1	2.93616	0
P-0009080	Samstein et al.(PMID 30643254)	74	Male		Non-Small Cell Lung Cancer	PD-1/PDL-1	7	1	5.87232	0
P-0009084	Samstein et al.(PMID 30643254)	51	Male		Melanoma	Combo	18	1	3.91488	0
P-0009088	Samstein et al.(PMID 30643254)	56	Male		Esophagogastric Cancer	PD-1/PDL-1	2	1	4.8936	0
P-0009100	Samstein et al.(PMID 30643254)	56	Male		Esophagogastric Cancer	PD-1/PDL-1	2	1	2.93616	0
P-0009101	Samstein et al.(PMID 30643254)	58	Male		Bladder Cancer	PD-1/PDL-1	20	0	8.80848	0
P-0009105	Samstein et al.(PMID 30643254)	66	Female		Melanoma	CTLA4	39	0	32.2978	0
P-0009106	Samstein et al.(PMID 30643254)	68	Female		Melanoma	Combo	31	0	12.7234	0
P-0009108	Samstein et al.(PMID 30643254)	69	Male		Melanoma	Combo	20	0	38.1701	0
P-0009119	Samstein et al.(PMID 30643254)	67	Male		Glioma	PD-1/PDL-1	18	1	6.85104	0
P-0009148	Samstein et al.(PMID 30643254)	47	Male		Melanoma	CTLA4	45	0	14.6808	0
P-0009152	Samstein et al.(PMID 30643254)	51	Male		Bladder Cancer	PD-1/PDL-1	25	0	58.7232	0
P-0009161	Samstein et al.(PMID 30643254)	63	Female		Non-Small Cell Lung Cancer	PD-1/PDL-1	13	0	10.7659	0
P-0009177	Samstein et al.(PMID 30643254)	56	Female		Melanoma	Combo	8	1	5.87232	0
P-0009180	Samstein et al.(PMID 30643254)	41	Female		Melanoma	Combo	4	1	1.95744	0
P-0009188	Samstein et al.(PMID 30643254)	81	Male		Head and Neck Cancer	Combo	27	0	6.85104	0
P-0009189	Samstein et al.(PMID 30643254)	81	Male		Melanoma	Combo	24	0	66.5529	0
P-0009202	Samstein et al.(PMID 30643254)	66	Male		Head and Neck Cancer	PD-1/PDL-1	15	0	11.7446	0
P-0009245	Samstein et al.(PMID 30643254)	88	Male		Melanoma	PD-1/PDL-1	11	1	23.4893	0
P-0009256	Samstein et al.(PMID 30643254)	76	Female		Non-Small Cell Lung Cancer	PD-1/PDL-1	26	0	9.7872	0
P-0009263	Samstein et al.(PMID 30643254)	39	Male		Bladder Cancer	Combo	12	1	23.4893	0
P-0009274	Samstein et al.(PMID 30643254)	77	Female		Non-Small Cell Lung Cancer	Combo	7	1	3.91488	0
P-0009292	Samstein et al.(PMID 30643254)	60	Male		Melanoma	PD-1/PDL-1	24	0	7.82976	0
P-0009293	Samstein et al.(PMID 30643254)	81	Female		Non-Small Cell Lung Cancer	PD-1/PDL-1	25	0	21.5318	1
P-0009297	Samstein et al.(PMID 30643254)	40	Female		Breast Cancer	PD-1/PDL-1	14	1	8.80848	0
P-0009308	Samstein et al.(PMID 30643254)	48	Female		Melanoma	Combo	22	0	0.97872	0
P-0009311	Samstein et al.(PMID 30643254)	73	Female		Melanoma	Combo	7	1	31.319	1
P-0009319	Samstein et al.(PMID 30643254)	64	Male		Non-Small Cell Lung Cancer	Combo	35	0	1.95744	0
P-0009324	Samstein et al.(PMID 30643254)	87	Male		Melanoma	PD-1/PDL-1	21	0	22.5106	0
P-0009336	Samstein et al.(PMID 30643254)	64	Female		Cancer of Unknown Primary	PD-1/PDL-1	0	0	5.87232	0
P-0009337	Samstein et al.(PMID 30643254)	72	Male		Esophagogastric Cancer	PD-1/PDL-1	1	1	3.91488	0
P-0009345	Samstein et al.(PMID 30643254)	55	Female		Melanoma	Combo	23	0	1.95744	0
P-0009347	Samstein et al.(PMID 30643254)	72	Male		Renal Cell Carcinoma	Combo	25	0	9.7872	1
P-0009348	Samstein et al.(PMID 30643254)	54	Male		Renal Cell Carcinoma	Combo	30	0	3.91488	0
P-0009349	Samstein et al.(PMID 30643254)	88	Female		Melanoma	PD-1/PDL-1	21	0	34.2552	0
P-0009363	Samstein et al.(PMID 30643254)	63	Female		Colorectal Cancer	PD-1/PDL-1	4	1	6.85104	0
P-0009364	Samstein et al.(PMID 30643254)	63	Female		Breast Cancer	PD-1/PDL-1	19	0	28.3829	1
P-0009365	Samstein et al.(PMID 30643254)	53	Female		Glioma	PD-1/PDL-1	9	1	3.91488	0
P-0009368	Samstein et al.(PMID 30643254)	52	Male		Esophagogastric Cancer	Combo	38	0	1.95744	0
P-0009370	Samstein et al.(PMID 30643254)	67	Female		Non-Small Cell Lung Cancer	PD-1/PDL-1	1	0	8.80848	0
P-0009379	Samstein et al.(PMID 30643254)	69	Male		Non-Small Cell Lung Cancer	PD-1/PDL-1	1	1	9.7872	0
P-0009411	Samstein et al.(PMID 30643254)	52	Female		Glioma	PD-1/PDL-1	21	1	61.6593	0
P-0009414	Samstein et al.(PMID 30643254)	58	Male		Bladder Cancer	PD-1/PDL-1	9	1	2.93616	0
P-0009419	Samstein et al.(PMID 30643254)	61	Male		Non-Small Cell Lung Cancer	PD-1/PDL-1	20	0	12.7234	0
P-0009426	Samstein et al.(PMID 30643254)	65	Female		Non-Small Cell Lung Cancer	PD-1/PDL-1	11	1	9.7872	0
P-0009431	Samstein et al.(PMID 30643254)	74	Female		Non-Small Cell Lung Cancer	PD-1/PDL-1	1	1	8.80848	0
P-0009434	Samstein et al.(PMID 30643254)	58	Male		Non-Small Cell Lung Cancer	PD-1/PDL-1	0	0	4.8936	0
P-0009435	Samstein et al.(PMID 30643254)	66	Female		Melanoma	PD-1/PDL-1	20	0	0.97872	0
P-0009451	Samstein et al.(PMID 30643254)	69	Male		Glioma	PD-1/PDL-1	13	1	4.8936	0
P-0009453	Samstein et al.(PMID 30643254)	64	Female		Glioma	PD-1/PDL-1	7	1	2.93616	0
P-0009469	Samstein et al.(PMID 30643254)	32	Female		Non-Small Cell Lung Cancer	PD-1/PDL-1	3	0	2.93616	0
P-0009473	Samstein et al.(PMID 30643254)	80	Male		Non-Small Cell Lung Cancer	PD-1/PDL-1	23	0	8.80848	0
P-0009476	Samstein et al.(PMID 30643254)	58	Female		Non-Small Cell Lung Cancer	PD-1/PDL-1	5	1	7.82976	0
P-0009483	Samstein et al.(PMID 30643254)	82	Female		Non-Small Cell Lung Cancer	PD-1/PDL-1	9	1	9.7872	0
P-0009497	Samstein et al.(PMID 30643254)	71	Male		Melanoma	CTLA4	56	0	2.93616	0
P-0009498	Samstein et al.(PMID 30643254)	54	Female		Breast Cancer	PD-1/PDL-1	13	0	4.8936	0
P-0009499	Samstein et al.(PMID 30643254)	36	Male		Glioma	PD-1/PDL-1	5	1	50.8934	1
P-0009501	Samstein et al.(PMID 30643254)	73	Male		Non-Small Cell Lung Cancer	PD-1/PDL-1	23	1	5.87232	0
P-0009505	Samstein et al.(PMID 30643254)	63	Female		Non-Small Cell Lung Cancer	PD-1/PDL-1	3	1	2.93616	0
P-0009517	Samstein et al.(PMID 30643254)	79	Male		Renal Cell Carcinoma	PD-1/PDL-1	23	1	4.8936	0
P-0009521	Samstein et al.(PMID 30643254)	75	Female		Cancer of Unknown Primary	PD-1/PDL-1	7	1	1.95744	0
P-0009526	Samstein et al.(PMID 30643254)	69	Male		Non-Small Cell Lung Cancer	PD-1/PDL-1	5	1	11.7446	0
P-0009527	Samstein et al.(PMID 30643254)	42	Female		Melanoma	Combo	19	0	12.7234	0
P-0009532	Samstein et al.(PMID 30643254)	59	Male		Non-Small Cell Lung Cancer	PD-1/PDL-1	2	1	10.7659	0
P-0009539	Samstein et al.(PMID 30643254)	73	Female		Non-Small Cell Lung Cancer	PD-1/PDL-1	1	1	0	0
P-0009563	Samstein et al.(PMID 30643254)	57	Male		Esophagogastric Cancer	PD-1/PDL-1	1	1	8.80848	0
P-0009586	Samstein et al.(PMID 30643254)	56	Female		Non-Small Cell Lung Cancer	PD-1/PDL-1	24	0	11.7446	0
P-0009588	Samstein et al.(PMID 30643254)	35	Male		Head and Neck Cancer	PD-1/PDL-1	8	1	2.93616	0
P-0009638	Samstein et al.(PMID 30643254)	82	Male		Non-Small Cell Lung Cancer	PD-1/PDL-1	2	1	18.5957	0
P-0009648	Samstein et al.(PMID 30643254)	58	Male		Melanoma	PD-1/PDL-1	15	1	0.97872	0
P-0009655	Samstein et al.(PMID 30643254)	71	Female		Non-Small Cell Lung Cancer	Combo	56	0	2.93616	0
P-0009660	Samstein et al.(PMID 30643254)	61	Male		Non-Small Cell Lung Cancer	PD-1/PDL-1	20	0	23.4893	0
P-0009706	Samstein et al.(PMID 30643254)	53	Male		Renal Cell Carcinoma	PD-1/PDL-1	26	0	22.5106	0
P-0009711	Samstein et al.(PMID 30643254)	60	Male		Glioma	PD-1/PDL-1	22	1	2.93616	0
P-0009714	Samstein et al.(PMID 30643254)	60	Male		Non-Small Cell Lung Cancer	PD-1/PDL-1	5	1	19.5744	0
P-0009717	Samstein et al.(PMID 30643254)	51	Male		Renal Cell Carcinoma	PD-1/PDL-1	24	0	3.91488	0
P-0009727	Samstein et al.(PMID 30643254)	44	Female		Breast Cancer	CTLA4	4	1	0.97872	0
P-0009736	Samstein et al.(PMID 30643254)	64	Male		Melanoma	Combo	23	0	13.7021	0
P-0009743	Samstein et al.(PMID 30643254)	68	Male		Bladder Cancer	PD-1/PDL-1	2	1	0	0
P-0009747	Samstein et al.(PMID 30643254)	82	Male		Melanoma	PD-1/PDL-1	19	1	24.468	0
P-0009756	Samstein et al.(PMID 30643254)	84	Female		Cancer of Unknown Primary	PD-1/PDL-1	4	1	5.87232	0
P-0009762	Samstein et al.(PMID 30643254)	71	Male		Non-Small Cell Lung Cancer	PD-1/PDL-1	16	1	7.82976	0
P-0009764	Samstein et al.(PMID 30643254)	51	Female		Non-Small Cell Lung Cancer	PD-1/PDL-1	16	0	22.5106	0
P-0009788	Samstein et al.(PMID 30643254)	49	Male		Renal Cell Carcinoma	PD-1/PDL-1	24	0	1.95744	0
P-0009790	Samstein et al.(PMID 30643254)	70	Male		Glioma	PD-1/PDL-1	16	1	1.95744	0
P-0009830	Samstein et al.(PMID 30643254)	25	Male		Colorectal Cancer	PD-1/PDL-1	30	0	44.0424	1
P-0009831	Samstein et al.(PMID 30643254)	68	Female		Melanoma	PD-1/PDL-1	15	1	1.95744	0
P-0009833	Samstein et al.(PMID 30643254)	54	Female		Non-Small Cell Lung Cancer	PD-1/PDL-1	20	0	32.2978	0
P-0009846	Samstein et al.(PMID 30643254)	77	Male		Bladder Cancer	PD-1/PDL-1	1	1	11.7446	0
P-0009898	Samstein et al.(PMID 30643254)	85	Male		Bladder Cancer	PD-1/PDL-1	1	1	7.82976	0
P-0009906	Samstein et al.(PMID 30643254)	53	Male		Renal Cell Carcinoma	PD-1/PDL-1	24	0	3.91488	0
P-0009910	Samstein et al.(PMID 30643254)	70	Female		Bladder Cancer	PD-1/PDL-1	5	1	13.7021	0
P-0009915	Samstein et al.(PMID 30643254)	59	Male		Non-Small Cell Lung Cancer	PD-1/PDL-1	7	1	7.82976	0
P-0009918	Samstein et al.(PMID 30643254)	87	Male		Esophagogastric Cancer	PD-1/PDL-1	23	0	61.6593	1
P-0009924	Samstein et al.(PMID 30643254)	79	Male		Non-Small Cell Lung Cancer	PD-1/PDL-1	13	0	17.617	0
P-0009944	Samstein et al.(PMID 30643254)	72	Female		Melanoma	Combo	23	0	1.95744	0
P-0009950	Samstein et al.(PMID 30643254)	58	Male		Melanoma	Combo	24	0	69.4891	0
P-0009959	Samstein et al.(PMID 30643254)	66	Male		Non-Small Cell Lung Cancer	PD-1/PDL-1	13	1	2.93616	0
P-0009969	Samstein et al.(PMID 30643254)	59	Male		Head and Neck Cancer	PD-1/PDL-1	3	0	2.93616	0
P-0010004	Samstein et al.(PMID 30643254)	45	Female		Glioma	PD-1/PDL-1	9	1	2.93616	0
P-0010008	Samstein et al.(PMID 30643254)	67	Male		Melanoma	Combo	2	1	4.8936	0
P-0010013	Samstein et al.(PMID 30643254)	77	Male		Non-Small Cell Lung Cancer	PD-1/PDL-1	3	1	1.95744	0
P-0010024	Samstein et al.(PMID 30643254)	81	Male		Non-Small Cell Lung Cancer	PD-1/PDL-1	27	0	3.91488	0
P-0010025	Samstein et al.(PMID 30643254)	58	Female		Non-Small Cell Lung Cancer	PD-1/PDL-1	10	1	10.7659	0
P-0010046	Samstein et al.(PMID 30643254)	54	Female		Renal Cell Carcinoma	PD-1/PDL-1	11	1	0.97872	0
P-0010065	Samstein et al.(PMID 30643254)	40	Male		Non-Small Cell Lung Cancer	PD-1/PDL-1	9	0	1.95744	0
P-0010079	Samstein et al.(PMID 30643254)	72	Male		Bladder Cancer	PD-1/PDL-1	15	0	2.93616	0
P-0010082	Samstein et al.(PMID 30643254)	77	Male		Head and Neck Cancer	PD-1/PDL-1	1	1	3.91488	0
P-0010088	Samstein et al.(PMID 30643254)	61	Male		Head and Neck Cancer	PD-1/PDL-1	18	0	12.7234	0
P-0010094	Samstein et al.(PMID 30643254)	54	Male		Bladder Cancer	PD-1/PDL-1	6	1	2.93616	0
P-0010099	Samstein et al.(PMID 30643254)	42	Male		Esophagogastric Cancer	PD-1/PDL-1	0	0	0	0
P-0010104	Samstein et al.(PMID 30643254)	34	Male		Head and Neck Cancer	PD-1/PDL-1	3	1	4.8936	0
P-0010111	Samstein et al.(PMID 30643254)	35	Female		Melanoma	CTLA4	13	0	1.95744	0
P-0010115	Samstein et al.(PMID 30643254)	53	Male		Melanoma	PD-1/PDL-1	23	0	51.8721	0
P-0010140	Samstein et al.(PMID 30643254)	46	Female		Melanoma	PD-1/PDL-1	21	0	0	0
P-0010161	Samstein et al.(PMID 30643254)	53	Male		Head and Neck Cancer	PD-1/PDL-1	2	1	0	0
P-0010174	Samstein et al.(PMID 30643254)	68	Male		Head and Neck Cancer	PD-1/PDL-1	7	0	10.7659	0
P-0010184	Samstein et al.(PMID 30643254)	59	Female		Renal Cell Carcinoma	PD-1/PDL-1	25	0	2.93616	0
P-0010199	Samstein et al.(PMID 30643254)	56	Male		Bladder Cancer	PD-1/PDL-1	17	0	16.6382	0
P-0010212	Samstein et al.(PMID 30643254)	62	Male		Renal Cell Carcinoma	PD-1/PDL-1	9	0	3.91488	0
P-0010213	Samstein et al.(PMID 30643254)	51	Female		Non-Small Cell Lung Cancer	PD-1/PDL-1	25	0	15.6595	0
P-0010215	Samstein et al.(PMID 30643254)	74	Female		Non-Small Cell Lung Cancer	PD-1/PDL-1	3	1	6.85104	0
P-0010222	Samstein et al.(PMID 30643254)	72	Male		Head and Neck Cancer	PD-1/PDL-1	4	1	2.93616	0
P-0010232	Samstein et al.(PMID 30643254)	52	Male		Melanoma	Combo	25	0	13.7021	0
P-0010236	Samstein et al.(PMID 30643254)	64	Male		Bladder Cancer	Combo	25	0	12.7234	0
P-0010238	Samstein et al.(PMID 30643254)	52	Female		Colorectal Cancer	PD-1/PDL-1	21	1	7.82976	0
P-0010241	Samstein et al.(PMID 30643254)	41	Female		Head and Neck Cancer	PD-1/PDL-1	16	0	65.5742	0
P-0010249	Samstein et al.(PMID 30643254)	66	Male		Melanoma	CTLA4	28	0	19.5744	0
P-0010252	Samstein et al.(PMID 30643254)	53	Female		Breast Cancer	PD-1/PDL-1	18	0	4.8936	0
P-0010254	Samstein et al.(PMID 30643254)	51	Female		Bladder Cancer	PD-1/PDL-1	3	1	0.97872	0
P-0010256	Samstein et al.(PMID 30643254)	73	Female		Non-Small Cell Lung Cancer	PD-1/PDL-1	21	1	3.91488	0
P-0010257	Samstein et al.(PMID 30643254)	55	Female		Non-Small Cell Lung Cancer	PD-1/PDL-1	0	1	9.7872	0
P-0010311	Samstein et al.(PMID 30643254)	60	Male		Renal Cell Carcinoma	Combo	34	0	7.82976	1
P-0010312	Samstein et al.(PMID 30643254)	62	Male		Head and Neck Cancer	PD-1/PDL-1	29	1	0.97872	0
P-0010317	Samstein et al.(PMID 30643254)	68	Male		Esophagogastric Cancer	PD-1/PDL-1	9	1	2.93616	0
P-0010327	Samstein et al.(PMID 30643254)	53	Male		Melanoma	Combo	23	0	0.97872	0
P-0010340	Samstein et al.(PMID 30643254)	52	Male		Melanoma	CTLA4	23	0	51.8721	0
P-0010344	Samstein et al.(PMID 30643254)	52	Male		Glioma	PD-1/PDL-1	2	1	2.93616	0
P-0010355	Samstein et al.(PMID 30643254)	69	Female		Non-Small Cell Lung Cancer	PD-1/PDL-1	1	1	6.85104	0
P-0010362	Samstein et al.(PMID 30643254)	60	Female		Non-Small Cell Lung Cancer	PD-1/PDL-1	3	1	2.93616	0
P-0010380	Samstein et al.(PMID 30643254)	74	Male		Glioma	PD-1/PDL-1	5	1	5.87232	0
P-0010381	Samstein et al.(PMID 30643254)	47	Male		Cancer of Unknown Primary	PD-1/PDL-1	1	0	1.95744	0
P-0010385	Samstein et al.(PMID 30643254)	72	Male		Non-Small Cell Lung Cancer	PD-1/PDL-1	0	1	7.82976	0
P-0010389	Samstein et al.(PMID 30643254)	69	Male		Non-Small Cell Lung Cancer	PD-1/PDL-1	9	1	0	0
P-0010450	Samstein et al.(PMID 30643254)	73	Male		Head and Neck Cancer	PD-1/PDL-1	14	1	8.80848	0
P-0010495	Samstein et al.(PMID 30643254)	71	Female		Melanoma	PD-1/PDL-1	2	1	3.91488	0
P-0010499	Samstein et al.(PMID 30643254)	65	Male		Colorectal Cancer	PD-1/PDL-1	2	1	151.702	0
P-0010501	Samstein et al.(PMID 30643254)	71	Male		Esophagogastric Cancer	PD-1/PDL-1	4	1	9.7872	0
P-0010516	Samstein et al.(PMID 30643254)	42	Female		Glioma	PD-1/PDL-1	22	0	2.93616	0
P-0010556	Samstein et al.(PMID 30643254)	50	Male		Glioma	PD-1/PDL-1	15	1	0.97872	0
P-0010581	Samstein et al.(PMID 30643254)	75	Male		Colorectal Cancer	PD-1/PDL-1	30	0	66.5529	1
P-0010587	Samstein et al.(PMID 30643254)	63	Female		Colorectal Cancer	PD-1/PDL-1	11	0	84.1699	1
P-0010588	Samstein et al.(PMID 30643254)	80	Female		Head and Neck Cancer	PD-1/PDL-1	4	1	4.8936	0
P-0010603	Samstein et al.(PMID 30643254)	62	Male		Renal Cell Carcinoma	PD-1/PDL-1	12	0	4.8936	0
P-0010613	Samstein et al.(PMID 30643254)	75	Female		Glioma	PD-1/PDL-1	3	0	8.80848	0
P-0010614	Samstein et al.(PMID 30643254)	62	Female		Melanoma	PD-1/PDL-1	11	1	1.95744	0
P-0010636	Samstein et al.(PMID 30643254)	68	Male		Non-Small Cell Lung Cancer	PD-1/PDL-1	16	1	6.85104	0
P-0010644	Samstein et al.(PMID 30643254)	40	Male		Melanoma	PD-1/PDL-1	10	1	0.97872	0
P-0010645	Samstein et al.(PMID 30643254)	53	Male		Non-Small Cell Lung Cancer	PD-1/PDL-1	3	1	3.91488	0
P-0010648	Samstein et al.(PMID 30643254)	73	Male		Non-Small Cell Lung Cancer	PD-1/PDL-1	18	1	1.95744	0
P-0010669	Samstein et al.(PMID 30643254)	66	Female		Breast Cancer	CTLA4	2	0	3.91488	0
P-0010670	Samstein et al.(PMID 30643254)	71	Male		Melanoma	Combo	13	0	12.7234	0
P-0010707	Samstein et al.(PMID 30643254)	79	Male		Head and Neck Cancer	PD-1/PDL-1	15	1	3.91488	0
P-0010715	Samstein et al.(PMID 30643254)	67	Male		Non-Small Cell Lung Cancer	Combo	15	0	49.9147	0
P-0010736	Samstein et al.(PMID 30643254)	80	Male		Non-Small Cell Lung Cancer	PD-1/PDL-1	18	1	25.4467	0
P-0010737	Samstein et al.(PMID 30643254)	56	Male		Melanoma	CTLA4	22	1	2.93616	0
P-0010742	Samstein et al.(PMID 30643254)	51	Female		Colorectal Cancer	PD-1/PDL-1	15	1	4.8936	0
P-0010744	Samstein et al.(PMID 30643254)	52	Female		Glioma	PD-1/PDL-1	5	0	98.8507	0
P-0010755	Samstein et al.(PMID 30643254)	62	Male		Head and Neck Cancer	PD-1/PDL-1	2	1	1.95744	0
P-0010760	Samstein et al.(PMID 30643254)	51	Male		Non-Small Cell Lung Cancer	PD-1/PDL-1	22	0	4.8936	0
P-0010791	Samstein et al.(PMID 30643254)	51	Male		Renal Cell Carcinoma	PD-1/PDL-1	24	0	3.91488	0
P-0010800	Samstein et al.(PMID 30643254)	64	Female		Breast Cancer	CTLA4	10	1	3.91488	0
P-0010816	Samstein et al.(PMID 30643254)	51	Male		Head and Neck Cancer	PD-1/PDL-1	7	1	7.82976	0
P-0010818	Samstein et al.(PMID 30643254)	85	Male		Melanoma	PD-1/PDL-1	10	1	15.6595	0
P-0010825	Samstein et al.(PMID 30643254)	42	Male		Esophagogastric Cancer	PD-1/PDL-1	8	0	0	0
P-0010826	Samstein et al.(PMID 30643254)	60	Male		Bladder Cancer	PD-1/PDL-1	7	0	3.91488	0
P-0010840	Samstein et al.(PMID 30643254)	55	Female		Non-Small Cell Lung Cancer	PD-1/PDL-1	2	1	10.7659	0
P-0010842	Samstein et al.(PMID 30643254)	NA	Male		Non-Small Cell Lung Cancer	PD-1/PDL-1	0	1	0	0
P-0010847	Samstein et al.(PMID 30643254)	59	Male		Melanoma	PD-1/PDL-1	22	0	19.5744	0
P-0010855	Samstein et al.(PMID 30643254)	74	Female		Non-Small Cell Lung Cancer	PD-1/PDL-1	7	1	6.85104	0
P-0010891	Samstein et al.(PMID 30643254)	42	Female		Non-Small Cell Lung Cancer	Combo	2	1	0.97872	0
P-0010915	Samstein et al.(PMID 30643254)	70	Female		Melanoma	PD-1/PDL-1	13	1	18.5957	0
P-0010921	Samstein et al.(PMID 30643254)	62	Male		Bladder Cancer	PD-1/PDL-1	11	1	45.9998	1
P-0010937	Samstein et al.(PMID 30643254)	79	Male		Melanoma	CTLA4	12	1	36.2126	0
P-0010945	Samstein et al.(PMID 30643254)	52	Male		Non-Small Cell Lung Cancer	PD-1/PDL-1	1	1	0	0
P-0010963	Samstein et al.(PMID 30643254)	61	Male		Renal Cell Carcinoma	PD-1/PDL-1	3	1	0.97872	0
P-0010966	Samstein et al.(PMID 30643254)	48	Male		Colorectal Cancer	PD-1/PDL-1	4	0	3.91488	0
P-0010975	Samstein et al.(PMID 30643254)	62	Female		Melanoma	PD-1/PDL-1	0	1	4.8936	0
P-0010986	Samstein et al.(PMID 30643254)	55	Female		Non-Small Cell Lung Cancer	PD-1/PDL-1	2	1	7.82976	0
P-0010994	Samstein et al.(PMID 30643254)	52	Female		Breast Cancer	PD-1/PDL-1	4	1	3.91488	0
P-0011012	Samstein et al.(PMID 30643254)	74	Male		Non-Small Cell Lung Cancer	PD-1/PDL-1	3	1	3.91488	0
P-0011030	Samstein et al.(PMID 30643254)	70	Male		Non-Small Cell Lung Cancer	PD-1/PDL-1	1	1	0.97872	0
P-0011033	Samstein et al.(PMID 30643254)	62	Female		Non-Small Cell Lung Cancer	PD-1/PDL-1	11	1	1.95744	0
P-0011036	Samstein et al.(PMID 30643254)	56	Male		Non-Small Cell Lung Cancer	PD-1/PDL-1	4	1	11.7446	0
P-0011047	Samstein et al.(PMID 30643254)	81	Female		Melanoma	PD-1/PDL-1	18	0	35.2339	0
P-0011068	Samstein et al.(PMID 30643254)	62	Male		Colorectal Cancer	PD-1/PDL-1	9	0	43.0637	0
P-0011071	Samstein et al.(PMID 30643254)	60	Male		Colorectal Cancer	PD-1/PDL-1	2	1	80.255	0
P-0011095	Samstein et al.(PMID 30643254)	50	Male		Renal Cell Carcinoma	PD-1/PDL-1	24	0	0	0
P-0011097	Samstein et al.(PMID 30643254)	79	Male		Renal Cell Carcinoma	PD-1/PDL-1	17	0	5.87232	0
P-0011119	Samstein et al.(PMID 30643254)	66	Female		Glioma	PD-1/PDL-1	20	1	0.97872	0
P-0011144	Samstein et al.(PMID 30643254)	26	Female		Colorectal Cancer	PD-1/PDL-1	4	1	4.8936	0
P-0011149	Samstein et al.(PMID 30643254)	59	Female		Cancer of Unknown Primary	PD-1/PDL-1	7	1	11.7446	0
P-0011162	Samstein et al.(PMID 30643254)	68	Male		Renal Cell Carcinoma	PD-1/PDL-1	12	1	3.91488	0
P-0011180	Samstein et al.(PMID 30643254)	61	Female		Non-Small Cell Lung Cancer	PD-1/PDL-1	7	0	1.95744	0
P-0011187	Samstein et al.(PMID 30643254)	69	Male		Bladder Cancer	PD-1/PDL-1	9	1	8.80848	0
P-0011192	Samstein et al.(PMID 30643254)	74	Female		Non-Small Cell Lung Cancer	PD-1/PDL-1	2	0	10.7659	0
P-0011195	Samstein et al.(PMID 30643254)	38	Female		Colorectal Cancer	PD-1/PDL-1	5	1	2.93616	0
P-0011219	Samstein et al.(PMID 30643254)	67	Male		Glioma	PD-1/PDL-1	13	1	3.91488	0
P-0011244	Samstein et al.(PMID 30643254)	77	Male		Non-Small Cell Lung Cancer	PD-1/PDL-1	3	1	2.93616	0
P-0011245	Samstein et al.(PMID 30643254)	64	Male		Bladder Cancer	PD-1/PDL-1	4	1	1.95744	0
P-0011246	Samstein et al.(PMID 30643254)	63	Female		Renal Cell Carcinoma	Combo	5	0	2.93616	0
P-0011288	Samstein et al.(PMID 30643254)	71	Female		Colorectal Cancer	Combo	4	0	10.7659	0
P-0011297	Samstein et al.(PMID 30643254)	46	Male		Melanoma	CTLA4	66	0	3.91488	0
P-0011357	Samstein et al.(PMID 30643254)	53	Male		Colorectal Cancer	PD-1/PDL-1	17	0	199.659	1
P-0011378	Samstein et al.(PMID 30643254)	68	Male		Non-Small Cell Lung Cancer	PD-1/PDL-1	2	1	8.80848	0
P-0011401	Samstein et al.(PMID 30643254)	53	Female		Glioma	PD-1/PDL-1	19	1	2.93616	0
P-0011418	Samstein et al.(PMID 30643254)	67	Male		Renal Cell Carcinoma	PD-1/PDL-1	22	0	3.91488	0
P-0011439	Samstein et al.(PMID 30643254)	76	Male		Bladder Cancer	PD-1/PDL-1	3	1	21.5318	0
P-0011440	Samstein et al.(PMID 30643254)	62	Male		Bladder Cancer	PD-1/PDL-1	2	1	27.4042	1
P-0011453	Samstein et al.(PMID 30643254)	66	Male		Non-Small Cell Lung Cancer	PD-1/PDL-1	1	1	5.87232	0
P-0011476	Samstein et al.(PMID 30643254)	49	Male		Melanoma	PD-1/PDL-1	16	0	6.85104	0
P-0011499	Samstein et al.(PMID 30643254)	71	Female		Non-Small Cell Lung Cancer	PD-1/PDL-1	6	1	7.82976	0
P-0011508	Samstein et al.(PMID 30643254)	62	Male		Non-Small Cell Lung Cancer	PD-1/PDL-1	1	1	6.85104	0
P-0011522	Samstein et al.(PMID 30643254)	81	Female		Renal Cell Carcinoma	PD-1/PDL-1	16	0	6.85104	0
P-0011523	Samstein et al.(PMID 30643254)	64	Female		Bladder Cancer	PD-1/PDL-1	21	0	5.87232	0
P-0011524	Samstein et al.(PMID 30643254)	60	Female		Bladder Cancer	PD-1/PDL-1	0	1	15.6595	0
P-0011535	Samstein et al.(PMID 30643254)	73	Female		Non-Small Cell Lung Cancer	PD-1/PDL-1	8	1	2.93616	0
P-0011538	Samstein et al.(PMID 30643254)	50	Male		Cancer of Unknown Primary	PD-1/PDL-1	3	1	0.97872	0
P-0011541	Samstein et al.(PMID 30643254)	77	Female		Non-Small Cell Lung Cancer	PD-1/PDL-1	13	0	3.91488	0
P-0011546	Samstein et al.(PMID 30643254)	62	Female		Non-Small Cell Lung Cancer	PD-1/PDL-1	3	0	9.7872	0
P-0011552	Samstein et al.(PMID 30643254)	73	Female		Breast Cancer	PD-1/PDL-1	4	1	5.87232	0
P-0011559	Samstein et al.(PMID 30643254)	73	Male		Non-Small Cell Lung Cancer	PD-1/PDL-1	7	1	3.91488	0
P-0012037	Samstein et al.(PMID 30643254)	77	Male		Bladder Cancer	PD-1/PDL-1	3	1	4.8936	0
P-0012040	Samstein et al.(PMID 30643254)	66	Male		Renal Cell Carcinoma	PD-1/PDL-1	5	1	3.91488	0
P-0012049	Samstein et al.(PMID 30643254)	68	Female		Non-Small Cell Lung Cancer	PD-1/PDL-1	11	0	10.7659	0
P-0012080	Samstein et al.(PMID 30643254)	59	Male		Melanoma	CTLA4	21	0	24.468	0
P-0012102	Samstein et al.(PMID 30643254)	62	Male		Renal Cell Carcinoma	PD-1/PDL-1	9	1	3.91488	0
P-0012107	Samstein et al.(PMID 30643254)	66	Male		Head and Neck Cancer	PD-1/PDL-1	21	0	11.7446	0
P-0012115	Samstein et al.(PMID 30643254)	49	Male		Colorectal Cancer	PD-1/PDL-1	19	0	53.8296	1
P-0012133	Samstein et al.(PMID 30643254)	39	Male		Colorectal Cancer	Combo	12	1	3.91488	0
P-0012137	Samstein et al.(PMID 30643254)	80	Female		Renal Cell Carcinoma	PD-1/PDL-1	4	1	0	0
P-0012183	Samstein et al.(PMID 30643254)	77	Male		Bladder Cancer	PD-1/PDL-1	16	0	7.82976	0
P-0012188	Samstein et al.(PMID 30643254)	70	Male		Cancer of Unknown Primary	PD-1/PDL-1	18	0	20.5531	0
P-0012189	Samstein et al.(PMID 30643254)	59	Female		Head and Neck Cancer	PD-1/PDL-1	2	1	8.80848	0
P-0012221	Samstein et al.(PMID 30643254)	54	Male		Renal Cell Carcinoma	PD-1/PDL-1	23	0	3.91488	0
P-0012249	Samstein et al.(PMID 30643254)	64	Female		Colorectal Cancer	PD-1/PDL-1	12	0	37.1913	1
P-0012256	Samstein et al.(PMID 30643254)	69	Male		Renal Cell Carcinoma	PD-1/PDL-1	24	0	6.85104	0
P-0012267	Samstein et al.(PMID 30643254)	72	Female		Renal Cell Carcinoma	Combo	45	0	3.91488	0
P-0012279	Samstein et al.(PMID 30643254)	64	Male		Renal Cell Carcinoma	PD-1/PDL-1	14	1	8.80848	0
P-0012281	Samstein et al.(PMID 30643254)	39	Male		Colorectal Cancer	PD-1/PDL-1	10	0	2.93616	0
P-0012282	Samstein et al.(PMID 30643254)	70	Male		Melanoma	CTLA4	17	0	9.7872	0
P-0012315	Samstein et al.(PMID 30643254)	62	Female		Melanoma	PD-1/PDL-1	18	0	11.7446	0
P-0012323	Samstein et al.(PMID 30643254)	47	Female		Renal Cell Carcinoma	PD-1/PDL-1	5	1	4.8936	0
P-0012341	Samstein et al.(PMID 30643254)	72	Female		Non-Small Cell Lung Cancer	PD-1/PDL-1	3	1	5.87232	0
P-0012361	Samstein et al.(PMID 30643254)	71	Male		Melanoma	PD-1/PDL-1	16	1	45.0211	1
P-0012370	Samstein et al.(PMID 30643254)	68	Male		Head and Neck Cancer	PD-1/PDL-1	14	1	0.97872	0
P-0012408	Samstein et al.(PMID 30643254)	83	Male		Melanoma	PD-1/PDL-1	17	0	14.6808	0
P-0012420	Samstein et al.(PMID 30643254)	73	Male		Melanoma	PD-1/PDL-1	19	0	10.7659	0
P-0012427	Samstein et al.(PMID 30643254)	67	Male		Non-Small Cell Lung Cancer	PD-1/PDL-1	7	1	5.87232	0
P-0012446	Samstein et al.(PMID 30643254)	45	Female		Melanoma	Combo	20	0	25.4467	1
P-0012516	Samstein et al.(PMID 30643254)	63	Male		Renal Cell Carcinoma	PD-1/PDL-1	22	0	3.91488	0
P-0012519	Samstein et al.(PMID 30643254)	61	Male		Renal Cell Carcinoma	PD-1/PDL-1	22	0	4.8936	0
P-0012529	Samstein et al.(PMID 30643254)	48	Male		Melanoma	PD-1/PDL-1	4	1	10.7659	1
P-0012550	Samstein et al.(PMID 30643254)	60	Female		Melanoma	PD-1/PDL-1	16	0	57.7445	0
P-0012551	Samstein et al.(PMID 30643254)	61	Female		Melanoma	CTLA4	20	0	10.7659	0
P-0012629	Samstein et al.(PMID 30643254)	82	Male		Non-Small Cell Lung Cancer	PD-1/PDL-1	18	1	2.93616	0
P-0012678	Samstein et al.(PMID 30643254)	73	Male		Non-Small Cell Lung Cancer	PD-1/PDL-1	20	0	23.4893	0
P-0012682	Samstein et al.(PMID 30643254)	59	Male		Renal Cell Carcinoma	PD-1/PDL-1	23	0	4.8936	0
P-0012687	Samstein et al.(PMID 30643254)	80	Male		Glioma	PD-1/PDL-1	10	1	3.91488	0
P-0012706	Samstein et al.(PMID 30643254)	80	Male		Bladder Cancer	PD-1/PDL-1	22	0	1.95744	0
P-0012708	Samstein et al.(PMID 30643254)	52	Female		Colorectal Cancer	Combo	5	0	4.8936	0
P-0012720	Samstein et al.(PMID 30643254)	25	Male		Esophagogastric Cancer	Combo	1	1	2.93616	0
P-0012728	Samstein et al.(PMID 30643254)	61	Female		Colorectal Cancer	PD-1/PDL-1	7	1	9.7872	0
P-0012729	Samstein et al.(PMID 30643254)	69	Male		Non-Small Cell Lung Cancer	PD-1/PDL-1	9	1	6.85104	0
P-0012780	Samstein et al.(PMID 30643254)	61	Female		Melanoma	Combo	11	1	6.85104	0
P-0012783	Samstein et al.(PMID 30643254)	62	Male		Melanoma	Combo	30	0	17.617	0
P-0012803	Samstein et al.(PMID 30643254)	50	Female		Breast Cancer	CTLA4	3	0	4.8936	0
P-0012817	Samstein et al.(PMID 30643254)	55	Male		Non-Small Cell Lung Cancer	PD-1/PDL-1	18	0	33.2765	0
P-0012822	Samstein et al.(PMID 30643254)	77	Female		Melanoma	Combo	2	1	0	0
P-0012825	Samstein et al.(PMID 30643254)	37	Female		Breast Cancer	PD-1/PDL-1	14	0	0.864698	0
P-0012840	Samstein et al.(PMID 30643254)	81	Male		Bladder Cancer	PD-1/PDL-1	15	1	5.87232	0
P-0012846	Samstein et al.(PMID 30643254)	59	Female		Non-Small Cell Lung Cancer	PD-1/PDL-1	20	0	7.82976	0
P-0012849	Samstein et al.(PMID 30643254)	67	Male		Non-Small Cell Lung Cancer	PD-1/PDL-1	2	1	9.7872	0
P-0012856	Samstein et al.(PMID 30643254)	58	Male		Melanoma	PD-1/PDL-1	18	0	38.1701	0
P-0012860	Samstein et al.(PMID 30643254)	85	Male		Melanoma	PD-1/PDL-1	10	0	93.9571	1
P-0012866	Samstein et al.(PMID 30643254)	51	Female		Non-Small Cell Lung Cancer	PD-1/PDL-1	19	1	5.87232	0
P-0012869	Samstein et al.(PMID 30643254)	23	Female		Melanoma	PD-1/PDL-1	14	1	4.8936	0
P-0012870	Samstein et al.(PMID 30643254)	72	Male		Bladder Cancer	PD-1/PDL-1	11	1	8.64698	0
P-0012883	Samstein et al.(PMID 30643254)	63	Male		Head and Neck Cancer	PD-1/PDL-1	3	0	15.6595	0
P-0012905	Samstein et al.(PMID 30643254)	20	Male		Cancer of Unknown Primary	Combo	16	0	1.95744	0
P-0012908	Samstein et al.(PMID 30643254)	80	Male		Non-Small Cell Lung Cancer	PD-1/PDL-1	13	1	6.85104	0
P-0012925	Samstein et al.(PMID 30643254)	74	Male		Non-Small Cell Lung Cancer	PD-1/PDL-1	10	1	5.87232	0
P-0012931	Samstein et al.(PMID 30643254)	72	Male		Non-Small Cell Lung Cancer	PD-1/PDL-1	2	0	9.7872	0
P-0012966	Samstein et al.(PMID 30643254)	57	Female		Melanoma	PD-1/PDL-1	12	1	2.93616	0
P-0012968	Samstein et al.(PMID 30643254)	61	Male		Melanoma	Combo	19	0	9.7872	0
P-0012993	Samstein et al.(PMID 30643254)	87	Male		Non-Small Cell Lung Cancer	PD-1/PDL-1	4	1	5.87232	0
P-0012999	Samstein et al.(PMID 30643254)	71	Male		Melanoma	Combo	13	1	20.5531	0
P-0013025	Samstein et al.(PMID 30643254)	60	Male		Melanoma	CTLA4	43	0	12.7234	0
P-0013029	Samstein et al.(PMID 30643254)	42	Male		Glioma	PD-1/PDL-1	3	1	30.3403	0
P-0013035	Samstein et al.(PMID 30643254)	47	Female		Melanoma	CTLA4	55	0	3.91488	0
P-0013063	Samstein et al.(PMID 30643254)	57	Male		Non-Small Cell Lung Cancer	PD-1/PDL-1	0	1	10.7659	0
P-0013078	Samstein et al.(PMID 30643254)	42	Female		Renal Cell Carcinoma	PD-1/PDL-1	19	0	2.93616	0
P-0013087	Samstein et al.(PMID 30643254)	60	Male		Colorectal Cancer	Combo	8	0	6.85104	0
P-0013089	Samstein et al.(PMID 30643254)	67	Female		Renal Cell Carcinoma	PD-1/PDL-1	9	1	5.87232	0
P-0013094	Samstein et al.(PMID 30643254)	73	Female		Cancer of Unknown Primary	PD-1/PDL-1	7	1	7.82976	0
P-0013096	Samstein et al.(PMID 30643254)	37	Male		Colorectal Cancer	PD-1/PDL-1	19	0	2.93616	0
P-0013106	Samstein et al.(PMID 30643254)	41	Male		Esophagogastric Cancer	PD-1/PDL-1	49	0	14.6808	0
P-0013111	Samstein et al.(PMID 30643254)	70	Male		Melanoma	PD-1/PDL-1	20	0	19.5744	1
P-0013147	Samstein et al.(PMID 30643254)	89	Male		Cancer of Unknown Primary	PD-1/PDL-1	9	1	4.8936	0
P-0013189	Samstein et al.(PMID 30643254)	58	Female		Non-Small Cell Lung Cancer	PD-1/PDL-1	20	0	1.95744	0
P-0013200	Samstein et al.(PMID 30643254)	69	Female		Melanoma	Combo	19	0	1.95744	0
P-0013204	Samstein et al.(PMID 30643254)	63	Male		Glioma	PD-1/PDL-1	15	0	2.93616	0
P-0013210	Samstein et al.(PMID 30643254)	59	Female		Breast Cancer	PD-1/PDL-1	3	1	2.93616	0
P-0013232	Samstein et al.(PMID 30643254)	63	Male		Melanoma	PD-1/PDL-1	11	0	46.9785	0
P-0013233	Samstein et al.(PMID 30643254)	70	Female		Non-Small Cell Lung Cancer	PD-1/PDL-1	13	0	7.82976	0
P-0013240	Samstein et al.(PMID 30643254)	56	Male		Renal Cell Carcinoma	PD-1/PDL-1	9	1	3.91488	0
P-0013243	Samstein et al.(PMID 30643254)	47	Female		Glioma	PD-1/PDL-1	8	1	4.8936	0
P-0013259	Samstein et al.(PMID 30643254)	47	Female		Glioma	PD-1/PDL-1	13	1	2.93616	0
P-0013274	Samstein et al.(PMID 30643254)	67	Male		Melanoma	PD-1/PDL-1	13	1	6.85104	0
P-0013278	Samstein et al.(PMID 30643254)	79	Male		Head and Neck Cancer	PD-1/PDL-1	33	1	7.82976	0
P-0013283	Samstein et al.(PMID 30643254)	49	Male		Bladder Cancer	PD-1/PDL-1	2	1	6.85104	0
P-0013294	Samstein et al.(PMID 30643254)	57	Female		Glioma	PD-1/PDL-1	4	1	2.93616	0
P-0013304	Samstein et al.(PMID 30643254)	72	Male		Bladder Cancer	PD-1/PDL-1	5	1	0.97872	0
P-0013309	Samstein et al.(PMID 30643254)	83	Female		Melanoma	Combo	19	0	0.97872	0
P-0013313	Samstein et al.(PMID 30643254)	79	Male		Melanoma	PD-1/PDL-1	11	1	5.87232	0
P-0013314	Samstein et al.(PMID 30643254)	70	Female		Esophagogastric Cancer	PD-1/PDL-1	20	1	0.97872	0
P-0013318	Samstein et al.(PMID 30643254)	67	Male		Melanoma	PD-1/PDL-1	18	0	6.85104	0
P-0013335	Samstein et al.(PMID 30643254)	48	Male		Renal Cell Carcinoma	PD-1/PDL-1	6	1	1.95744	0
P-0013343	Samstein et al.(PMID 30643254)	57	Female		Melanoma	CTLA4	60	1	19.5744	0
P-0013347	Samstein et al.(PMID 30643254)	55	Male		Glioma	PD-1/PDL-1	14	1	5.87232	0
P-0013354	Samstein et al.(PMID 30643254)	53	Female		Colorectal Cancer	PD-1/PDL-1	2	1	4.8936	0
P-0013360	Samstein et al.(PMID 30643254)	51	Male		Glioma	PD-1/PDL-1	13	0	4.8936	0
P-0013368	Samstein et al.(PMID 30643254)	61	Male		Renal Cell Carcinoma	PD-1/PDL-1	20	0	1.95744	0
P-0013380	Samstein et al.(PMID 30643254)	58	Male		Glioma	PD-1/PDL-1	17	0	1.95744	0
P-0013383	Samstein et al.(PMID 30643254)	84	Female		Melanoma	Combo	17	0	45.9998	0
P-0013389	Samstein et al.(PMID 30643254)	69	Male		Melanoma	PD-1/PDL-1	18	0	5.87232	0
P-0013412	Samstein et al.(PMID 30643254)	60	Male		Melanoma	Combo	13	0	3.91488	0
P-0013413	Samstein et al.(PMID 30643254)	76	Male		Melanoma	CTLA4	14	1	24.468	1
P-0013448	Samstein et al.(PMID 30643254)	83	Male		Melanoma	PD-1/PDL-1	19	0	12.7234	0
P-0013451	Samstein et al.(PMID 30643254)	58	Female		Melanoma	Combo	17	0	2.93616	0
P-0013462	Samstein et al.(PMID 30643254)	82	Female		Colorectal Cancer	PD-1/PDL-1	15	0	43.0637	1
P-0013463	Samstein et al.(PMID 30643254)	60	Male		Renal Cell Carcinoma	PD-1/PDL-1	20	0	4.8936	0
P-0013506	Samstein et al.(PMID 30643254)	57	Female		Glioma	PD-1/PDL-1	8	0	55.787	1
P-0013525	Samstein et al.(PMID 30643254)	69	Female		Melanoma	CTLA4	19	0	9.7872	1
P-0013544	Samstein et al.(PMID 30643254)	50	Male		Glioma	PD-1/PDL-1	13	1	3.45879	0
P-0013596	Samstein et al.(PMID 30643254)	58	Male		Melanoma	PD-1/PDL-1	8	1	9.7872	0
P-0013603	Samstein et al.(PMID 30643254)	53	Male		Glioma	PD-1/PDL-1	15	1	1.95744	0
P-0013652	Samstein et al.(PMID 30643254)	59	Male		Head and Neck Cancer	PD-1/PDL-1	3	1	8.80848	0
P-0013656	Samstein et al.(PMID 30643254)	55	Female		Non-Small Cell Lung Cancer	PD-1/PDL-1	5	1	3.91488	0
P-0013659	Samstein et al.(PMID 30643254)	81	Male		Melanoma	PD-1/PDL-1	17	0	9.7872	0
P-0013728	Samstein et al.(PMID 30643254)	62	Male		Renal Cell Carcinoma	Combo	46	0	1.95744	0
P-0013765	Samstein et al.(PMID 30643254)	64	Male		Melanoma	Combo	15	0	6.85104	0
P-0013814	Samstein et al.(PMID 30643254)	72	Male		Glioma	PD-1/PDL-1	15	0	4.8936	0
P-0013826	Samstein et al.(PMID 30643254)	90	Male		Melanoma	PD-1/PDL-1	1	0	162.467	1
P-0013845	Samstein et al.(PMID 30643254)	63	Male		Melanoma	Combo	28	0	1.95744	0
P-0013854	Samstein et al.(PMID 30643254)	78	Male		Melanoma	Combo	33	1	5.87232	0
P-0013861	Samstein et al.(PMID 30643254)	61	Male		Bladder Cancer	PD-1/PDL-1	7	0	2.93616	0
P-0013873	Samstein et al.(PMID 30643254)	61	Male		Bladder Cancer	PD-1/PDL-1	7	1	3.91488	0
P-0013892	Samstein et al.(PMID 30643254)	68	Male		Head and Neck Cancer	PD-1/PDL-1	16	1	1.95744	0
P-0013920	Samstein et al.(PMID 30643254)	70	Male		Head and Neck Cancer	PD-1/PDL-1	8	1	8.80848	0
P-0013923	Samstein et al.(PMID 30643254)	64	Female		Cancer of Unknown Primary	PD-1/PDL-1	13	0	16.6382	0
P-0013938	Samstein et al.(PMID 30643254)	55	Male		Glioma	PD-1/PDL-1	21	1	0.97872	0
P-0013951	Samstein et al.(PMID 30643254)	81	Male		Melanoma	Combo	10	1	1.95744	0
P-0013956	Samstein et al.(PMID 30643254)	44	Female		Melanoma	PD-1/PDL-1	8	1	5.87232	0
P-0013967	Samstein et al.(PMID 30643254)	60	Male		Renal Cell Carcinoma	PD-1/PDL-1	18	0	7.82976	0
P-0014006	Samstein et al.(PMID 30643254)	63	Male		Glioma	PD-1/PDL-1	18	1	0.97872	0
P-0014010	Samstein et al.(PMID 30643254)	36	Female		Colorectal Cancer	PD-1/PDL-1	3	1	6.85104	0
P-0014015	Samstein et al.(PMID 30643254)	67	Male		Head and Neck Cancer	PD-1/PDL-1	19	0	9.7872	0
P-0014022	Samstein et al.(PMID 30643254)	68	Male		Head and Neck Cancer	PD-1/PDL-1	9	1	0	0
P-0014060	Samstein et al.(PMID 30643254)	66	Female		Head and Neck Cancer	PD-1/PDL-1	7	0	5.87232	0
P-0014064	Samstein et al.(PMID 30643254)	60	Male		Renal Cell Carcinoma	PD-1/PDL-1	20	0	1.95744	0
P-0014071	Samstein et al.(PMID 30643254)	66	Male		Glioma	PD-1/PDL-1	6	1	4.8936	0
P-0014099	Samstein et al.(PMID 30643254)	77	Female		Glioma	PD-1/PDL-1	6	1	2.93616	0
P-0014118	Samstein et al.(PMID 30643254)	28	Male		Esophagogastric Cancer	Combo	2	1	0	0
P-0014124	Samstein et al.(PMID 30643254)	54	Female		Melanoma	PD-1/PDL-1	13	0	0	0
P-0014137	Samstein et al.(PMID 30643254)	78	Male		Melanoma	PD-1/PDL-1	9	0	24.468	0
P-0014147	Samstein et al.(PMID 30643254)	59	Male		Renal Cell Carcinoma	PD-1/PDL-1	10	1	6.85104	0
P-0014148	Samstein et al.(PMID 30643254)	44	Female		Melanoma	CTLA4	80	0	45.0211	1
P-0014159	Samstein et al.(PMID 30643254)	61	Male		Melanoma	PD-1/PDL-1	2	1	19.5744	0
P-0014172	Samstein et al.(PMID 30643254)	83	Male		Non-Small Cell Lung Cancer	PD-1/PDL-1	9	1	17.617	0
P-0014182	Samstein et al.(PMID 30643254)	66	Male		Colorectal Cancer	PD-1/PDL-1	2	0	7.78228	0
P-0014206	Samstein et al.(PMID 30643254)	55	Male		Melanoma	Combo	17	0	22.4822	1
P-0014207	Samstein et al.(PMID 30643254)	79	Male		Non-Small Cell Lung Cancer	PD-1/PDL-1	4	1	6.91758	0
P-0014220	Samstein et al.(PMID 30643254)	63	Male		Glioma	PD-1/PDL-1	14	0	4.32349	1
P-0014229	Samstein et al.(PMID 30643254)	45	Female		Melanoma	PD-1/PDL-1	16	0	29.3997	0
P-0014236	Samstein et al.(PMID 30643254)	78	Male		Melanoma	Combo	17	0	1.7294	0
P-0014242	Samstein et al.(PMID 30643254)	60	Male		Melanoma	Combo	18	0	25.0762	1
P-0014269	Samstein et al.(PMID 30643254)	75	Male		Non-Small Cell Lung Cancer	PD-1/PDL-1	9	1	0.864698	0
P-0014323	Samstein et al.(PMID 30643254)	45	Female		Cancer of Unknown Primary	PD-1/PDL-1	8	1	13.8352	0
P-0014328	Samstein et al.(PMID 30643254)	61	Female		Non-Small Cell Lung Cancer	Combo	1	1	4.32349	0
P-0014379	Samstein et al.(PMID 30643254)	48	Male		Melanoma	PD-1/PDL-1	17	0	0.864698	0
P-0014402	Samstein et al.(PMID 30643254)	67	Female		Bladder Cancer	PD-1/PDL-1	2	1	8.64698	0
P-0014418	Samstein et al.(PMID 30643254)	46	Male		Bladder Cancer	PD-1/PDL-1	5	1	13.8352	0
P-0014421	Samstein et al.(PMID 30643254)	83	Male		Bladder Cancer	Combo	35	0	4.32349	0
P-0014422	Samstein et al.(PMID 30643254)	74	Female		Bladder Cancer	PD-1/PDL-1	11	0	17.294	0
P-0014449	Samstein et al.(PMID 30643254)	67	Male		Melanoma	Combo	11	1	1.7294	0
P-0014451	Samstein et al.(PMID 30643254)	65	Female		Non-Small Cell Lung Cancer	PD-1/PDL-1	8	1	9.51168	0
P-0014465	Samstein et al.(PMID 30643254)	34	Male		Head and Neck Cancer	PD-1/PDL-1	2	0	7.78228	0
P-0014470	Samstein et al.(PMID 30643254)	80	Male		Bladder Cancer	PD-1/PDL-1	16	0	20.7528	0
P-0014507	Samstein et al.(PMID 30643254)	56	Female		Bladder Cancer	Combo	6	0	7.78228	0
P-0014513	Samstein et al.(PMID 30643254)	69	Female		Non-Small Cell Lung Cancer	PD-1/PDL-1	3	0	2.59409	0
P-0014529	Samstein et al.(PMID 30643254)	65	Female		Non-Small Cell Lung Cancer	PD-1/PDL-1	16	0	21.6175	0
P-0014556	Samstein et al.(PMID 30643254)	83	Male		Melanoma	PD-1/PDL-1	5	1	16.4293	0
P-0014562	Samstein et al.(PMID 30643254)	71	Male		Non-Small Cell Lung Cancer	PD-1/PDL-1	6	0	12.1058	0
P-0014565	Samstein et al.(PMID 30643254)	53	Female		Colorectal Cancer	PD-1/PDL-1	12	1	6.05289	0
P-0014594	Samstein et al.(PMID 30643254)	61	Male		Renal Cell Carcinoma	PD-1/PDL-1	16	0	2.59409	0
P-0014599	Samstein et al.(PMID 30643254)	63	Male		Non-Small Cell Lung Cancer	PD-1/PDL-1	17	0	14.6999	0
P-0014600	Samstein et al.(PMID 30643254)	73	Male		Renal Cell Carcinoma	PD-1/PDL-1	1	1	4.32349	0
P-0014619	Samstein et al.(PMID 30643254)	60	Male		Renal Cell Carcinoma	PD-1/PDL-1	18	0	2.59409	0
P-0014648	Samstein et al.(PMID 30643254)	67	Male		Bladder Cancer	PD-1/PDL-1	21	0	5.18819	0
P-0014666	Samstein et al.(PMID 30643254)	30	Female		Melanoma	PD-1/PDL-1	17	0	0	0
P-0014677	Samstein et al.(PMID 30643254)	50	Male		Glioma	PD-1/PDL-1	17	0	1.7294	0
P-0014682	Samstein et al.(PMID 30643254)	83	Male		Melanoma	PD-1/PDL-1	16	0	0.864698	0
P-0014736	Samstein et al.(PMID 30643254)	63	Male		Non-Small Cell Lung Cancer	PD-1/PDL-1	1	1	5.18819	0
P-0014772	Samstein et al.(PMID 30643254)	74	Female		Non-Small Cell Lung Cancer	PD-1/PDL-1	5	1	8.64698	0
P-0014786	Samstein et al.(PMID 30643254)	65	Female		Non-Small Cell Lung Cancer	PD-1/PDL-1	6	1	11.2411	0
P-0014815	Samstein et al.(PMID 30643254)	61	Female		Bladder Cancer	PD-1/PDL-1	7	1	5.18819	0
P-0014818	Samstein et al.(PMID 30643254)	83	Male		Non-Small Cell Lung Cancer	PD-1/PDL-1	12	1	28.535	0
P-0014898	Samstein et al.(PMID 30643254)	53	Male		Head and Neck Cancer	PD-1/PDL-1	2	1	5.18819	0
P-0014909	Samstein et al.(PMID 30643254)	67	Male		Bladder Cancer	PD-1/PDL-1	4	1	5.18819	0
P-0014910	Samstein et al.(PMID 30643254)	71	Male		Melanoma	PD-1/PDL-1	20	0	32.8585	0
P-0014965	Samstein et al.(PMID 30643254)	53	Male		Head and Neck Cancer	PD-1/PDL-1	12	0	1.7294	0
P-0014966	Samstein et al.(PMID 30643254)	66	Male		Melanoma	PD-1/PDL-1	17	0	5.18819	0
P-0015007	Samstein et al.(PMID 30643254)	20	Male		Melanoma	PD-1/PDL-1	19	0	6.05289	0
P-0015010	Samstein et al.(PMID 30643254)	85	Male		Melanoma	PD-1/PDL-1	13	0	1.7294	0
P-0015047	Samstein et al.(PMID 30643254)	76	Female		Non-Small Cell Lung Cancer	PD-1/PDL-1	15	0	12.9705	0
P-0015067	Samstein et al.(PMID 30643254)	72	Male		Bladder Cancer	PD-1/PDL-1	14	0	7.78228	0
P-0015078	Samstein et al.(PMID 30643254)	71	Female		Non-Small Cell Lung Cancer	PD-1/PDL-1	25	0	7.78228	0
P-0015085	Samstein et al.(PMID 30643254)	49	Female		Non-Small Cell Lung Cancer	PD-1/PDL-1	10	1	6.91758	0
P-0015122	Samstein et al.(PMID 30643254)	75	Female		Melanoma	PD-1/PDL-1	2	0	9.51168	0
P-0015137	Samstein et al.(PMID 30643254)	81	Male		Bladder Cancer	PD-1/PDL-1	17	1	12.9705	1
P-0015177	Samstein et al.(PMID 30643254)	73	Male		Non-Small Cell Lung Cancer	PD-1/PDL-1	1	1	7.78228	0
P-0015182	Samstein et al.(PMID 30643254)	83	Male		Melanoma	PD-1/PDL-1	17	0	3.45879	0
P-0015186	Samstein et al.(PMID 30643254)	76	Female		Bladder Cancer	PD-1/PDL-1	3	1	11.2411	1
P-0015214	Samstein et al.(PMID 30643254)	74	Female		Non-Small Cell Lung Cancer	PD-1/PDL-1	13	1	24.2115	1
P-0015222	Samstein et al.(PMID 30643254)	62	Male		Non-Small Cell Lung Cancer	PD-1/PDL-1	0	1	7.78228	0
P-0015237	Samstein et al.(PMID 30643254)	75	Female		Colorectal Cancer	PD-1/PDL-1	12	0	51.8819	0
P-0015251	Samstein et al.(PMID 30643254)	66	Male		Esophagogastric Cancer	Combo	6	1	8.64698	0
P-0015257	Samstein et al.(PMID 30643254)	68	Female		Melanoma	PD-1/PDL-1	14	0	58.7995	1
P-0015259	Samstein et al.(PMID 30643254)	88	Male		Non-Small Cell Lung Cancer	PD-1/PDL-1	14	0	2.59409	0
P-0015289	Samstein et al.(PMID 30643254)	23	Male		Glioma	PD-1/PDL-1	16	0	2.59409	0
P-0015296	Samstein et al.(PMID 30643254)	69	Male		Non-Small Cell Lung Cancer	PD-1/PDL-1	15	0	19.8881	0
P-0015331	Samstein et al.(PMID 30643254)	46	Male		Esophagogastric Cancer	Combo	1	1	17.294	0
P-0015342	Samstein et al.(PMID 30643254)	61	Male		Renal Cell Carcinoma	PD-1/PDL-1	18	0	1.7294	0
P-0015344	Samstein et al.(PMID 30643254)	61	Male		Bladder Cancer	PD-1/PDL-1	6	0	56.2054	0
P-0015346	Samstein et al.(PMID 30643254)	45	Female		Glioma	PD-1/PDL-1	8	0	1.7294	0
P-0015348	Samstein et al.(PMID 30643254)	63	Male		Non-Small Cell Lung Cancer	PD-1/PDL-1	15	0	10.3764	0
P-0015369	Samstein et al.(PMID 30643254)	63	Male		Glioma	PD-1/PDL-1	0	0	0.864698	0
P-0015373	Samstein et al.(PMID 30643254)	34	Male		Melanoma	Combo	17	0	29.3997	0
P-0015407	Samstein et al.(PMID 30643254)	66	Male		Melanoma	Combo	20	0	33.7232	0
P-0015415	Samstein et al.(PMID 30643254)	66	Male		Melanoma	Combo	5	1	77.8228	1
P-0015433	Samstein et al.(PMID 30643254)	68	Male		Renal Cell Carcinoma	PD-1/PDL-1	13	0	0.864698	0
P-0015438	Samstein et al.(PMID 30643254)	73	Male		Melanoma	Combo	15	0	66.5818	0
P-0015445	Samstein et al.(PMID 30643254)	60	Female		Breast Cancer	PD-1/PDL-1	2	1	2.59409	0
P-0015456	Samstein et al.(PMID 30643254)	43	Female		Bladder Cancer	PD-1/PDL-1	10	0	6.05289	0
P-0015471	Samstein et al.(PMID 30643254)	70	Male		Melanoma	PD-1/PDL-1	13	0	1.7294	0
P-0015501	Samstein et al.(PMID 30643254)	69	Male		Bladder Cancer	PD-1/PDL-1	14	1	14.6999	0
P-0015511	Samstein et al.(PMID 30643254)	33	Male		Melanoma	Combo	15	0	12.9705	0
P-0015512	Samstein et al.(PMID 30643254)	85	Male		Melanoma	PD-1/PDL-1	16	0	96.8462	0
P-0015521	Samstein et al.(PMID 30643254)	54	Male		Melanoma	PD-1/PDL-1	15	0	19.0234	1
P-0015530	Samstein et al.(PMID 30643254)	54	Male		Melanoma	PD-1/PDL-1	15	0	5.18819	0
P-0015531	Samstein et al.(PMID 30643254)	54	Female		Non-Small Cell Lung Cancer	PD-1/PDL-1	9	1	4.32349	0
P-0015556	Samstein et al.(PMID 30643254)	67	Male		Non-Small Cell Lung Cancer	PD-1/PDL-1	30	0	4.32349	0
P-0015573	Samstein et al.(PMID 30643254)	59	Male		Glioma	PD-1/PDL-1	8	0	51.0172	1
P-0015591	Samstein et al.(PMID 30643254)	62	Male		Head and Neck Cancer	PD-1/PDL-1	14	1	0	0
P-0015593	Samstein et al.(PMID 30643254)	69	Female		Non-Small Cell Lung Cancer	PD-1/PDL-1	14	0	4.32349	0
P-0015600	Samstein et al.(PMID 30643254)	50	Female		Non-Small Cell Lung Cancer	PD-1/PDL-1	13	1	4.32349	0
P-0015603	Samstein et al.(PMID 30643254)	64	Male		Glioma	PD-1/PDL-1	14	0	3.45879	0
P-0015612	Samstein et al.(PMID 30643254)	66	Female		Melanoma	Combo	15	0	19.8881	0
P-0015615	Samstein et al.(PMID 30643254)	70	Male		Bladder Cancer	PD-1/PDL-1	21	0	2.59409	0
P-0015644	Samstein et al.(PMID 30643254)	62	Female		Bladder Cancer	Combo	26	0	3.45879	0
P-0015648	Samstein et al.(PMID 30643254)	67	Male		Non-Small Cell Lung Cancer	PD-1/PDL-1	20	0	4.32349	0
P-0015649	Samstein et al.(PMID 30643254)	75	Male		Bladder Cancer	Combo	24	1	44.0996	0
P-0015660	Samstein et al.(PMID 30643254)	71	Male		Bladder Cancer	Combo	28	1	8.64698	0
P-0015661	Samstein et al.(PMID 30643254)	55	Male		Bladder Cancer	PD-1/PDL-1	10	0	3.45879	0
P-0015663	Samstein et al.(PMID 30643254)	75	Female		Bladder Cancer	Combo	5	0	4.32349	0
P-0015679	Samstein et al.(PMID 30643254)	47	Male		Melanoma	Combo	18	0	5.18819	0
P-0015697	Samstein et al.(PMID 30643254)	69	Female		Melanoma	PD-1/PDL-1	14	0	18.1587	0
P-0015713	Samstein et al.(PMID 30643254)	33	Female		Breast Cancer	PD-1/PDL-1	9	0	0.864698	0
P-0015716	Samstein et al.(PMID 30643254)	76	Male		Bladder Cancer	PD-1/PDL-1	15	0	6.05289	0
P-0015717	Samstein et al.(PMID 30643254)	56	Male		Melanoma	Combo	18	0	1.7294	0
P-0015745	Samstein et al.(PMID 30643254)	72	Male		Head and Neck Cancer	PD-1/PDL-1	14	0	5.18819	0
P-0015758	Samstein et al.(PMID 30643254)	89	Female		Non-Small Cell Lung Cancer	PD-1/PDL-1	13	0	5.18819	0
P-0015780	Samstein et al.(PMID 30643254)	53	Male		Non-Small Cell Lung Cancer	PD-1/PDL-1	18	0	6.05289	0
P-0015785	Samstein et al.(PMID 30643254)	57	Female		Non-Small Cell Lung Cancer	PD-1/PDL-1	9	1	22.4822	0
P-0015791	Samstein et al.(PMID 30643254)	65	Male		Melanoma	PD-1/PDL-1	58	1	6.91758	0
P-0015830	Samstein et al.(PMID 30643254)	83	Male		Melanoma	PD-1/PDL-1	14	0	50.1525	0
P-0015851	Samstein et al.(PMID 30643254)	58	Male		Colorectal Cancer	PD-1/PDL-1	5	0	30.2644	0
P-0015855	Samstein et al.(PMID 30643254)	54	Male		Melanoma	PD-1/PDL-1	16	0	10.3764	0
P-0015904	Samstein et al.(PMID 30643254)	38	Male		Esophagogastric Cancer	Combo	6	0	11.2411	0
P-0015905	Samstein et al.(PMID 30643254)	52	Female		Breast Cancer	PD-1/PDL-1	1	1	4.32349	0
P-0015920	Samstein et al.(PMID 30643254)	80	Male		Bladder Cancer	PD-1/PDL-1	15	0	41.5055	1
P-0015923	Samstein et al.(PMID 30643254)	82	Male		Bladder Cancer	PD-1/PDL-1	38	0	31.1291	1
P-0015928	Samstein et al.(PMID 30643254)	78	Male		Cancer of Unknown Primary	Combo	16	0	6.91758	0
P-0015937	Samstein et al.(PMID 30643254)	74	Female		Non-Small Cell Lung Cancer	PD-1/PDL-1	15	0	10.3764	0
P-0015955	Samstein et al.(PMID 30643254)	75	Female		Non-Small Cell Lung Cancer	PD-1/PDL-1	14	1	6.91758	0
P-0015965	Samstein et al.(PMID 30643254)	70	Female		Bladder Cancer	PD-1/PDL-1	6	1	2.59409	0
P-0015966	Samstein et al.(PMID 30643254)	71	Male		Bladder Cancer	PD-1/PDL-1	15	0	22.4822	0
P-0015967	Samstein et al.(PMID 30643254)	61	Male		Cancer of Unknown Primary	PD-1/PDL-1	2	0	3.45879	0
P-0015977	Samstein et al.(PMID 30643254)	42	Female		Melanoma	Combo	17	0	2.59409	0
P-0015983	Samstein et al.(PMID 30643254)	66	Female		Renal Cell Carcinoma	PD-1/PDL-1	23	0	5.18819	0
P-0015984	Samstein et al.(PMID 30643254)	67	Female		Non-Small Cell Lung Cancer	PD-1/PDL-1	6	1	24.2115	0
P-0015987	Samstein et al.(PMID 30643254)	71	Female		Non-Small Cell Lung Cancer	PD-1/PDL-1	10	1	7.78228	0
P-0015989	Samstein et al.(PMID 30643254)	67	Male		Melanoma	PD-1/PDL-1	14	0	2.59409	0
P-0016025	Samstein et al.(PMID 30643254)	77	Female		Head and Neck Cancer	PD-1/PDL-1	15	0	23.3468	0
P-0016028	Samstein et al.(PMID 30643254)	62	Female		Cancer of Unknown Primary	PD-1/PDL-1	5	0	2.59409	0
P-0016033	Samstein et al.(PMID 30643254)	73	Male		Non-Small Cell Lung Cancer	PD-1/PDL-1	15	0	28.535	0
P-0016046	Samstein et al.(PMID 30643254)	69	Female		Non-Small Cell Lung Cancer	PD-1/PDL-1	16	0	5.18819	0
P-0016048	Samstein et al.(PMID 30643254)	25	Female		Glioma	PD-1/PDL-1	12	1	4.32349	0
P-0016062	Samstein et al.(PMID 30643254)	63	Male		Head and Neck Cancer	PD-1/PDL-1	14	0	10.3764	0
P-0016063	Samstein et al.(PMID 30643254)	68	Male		Cancer of Unknown Primary	CTLA4	2	1	3.45879	0
P-0016149	Samstein et al.(PMID 30643254)	65	Male		Bladder Cancer	Combo	7	0	15.5646	0
P-0016174	Samstein et al.(PMID 30643254)	73	Female		Non-Small Cell Lung Cancer	PD-1/PDL-1	14	0	12.9705	0
P-0016175	Samstein et al.(PMID 30643254)	77	Female		Non-Small Cell Lung Cancer	PD-1/PDL-1	1	1	14.6999	0
P-0016177	Samstein et al.(PMID 30643254)	73	Male		Melanoma	PD-1/PDL-1	15	0	4.32349	0
P-0016181	Samstein et al.(PMID 30643254)	77	Female		Colorectal Cancer	PD-1/PDL-1	67	0	65.7171	0
P-0016185	Samstein et al.(PMID 30643254)	73	Male		Non-Small Cell Lung Cancer	PD-1/PDL-1	9	1	6.05289	0
P-0016188	Samstein et al.(PMID 30643254)	72	Male		Cancer of Unknown Primary	PD-1/PDL-1	8	0	25.0762	0
P-0016191	Samstein et al.(PMID 30643254)	78	Male		Head and Neck Cancer	PD-1/PDL-1	7	0	7.78228	0
P-0016197	Samstein et al.(PMID 30643254)	83	Male		Melanoma	PD-1/PDL-1	3	1	26.8056	0
P-0016210	Samstein et al.(PMID 30643254)	74	Male		Head and Neck Cancer	PD-1/PDL-1	14	0	4.32349	0
P-0016226	Samstein et al.(PMID 30643254)	54	Female		Breast Cancer	CTLA4	22	1	3.45879	0
P-0016233	Samstein et al.(PMID 30643254)	82	Male		Esophagogastric Cancer	PD-1/PDL-1	3	1	4.32349	0
P-0016237	Samstein et al.(PMID 30643254)	70	Male		Cancer of Unknown Primary	PD-1/PDL-1	3	1	1.7294	0
P-0016238	Samstein et al.(PMID 30643254)	57	Male		Glioma	PD-1/PDL-1	23	0	1.7294	0
P-0016240	Samstein et al.(PMID 30643254)	55	Female		Head and Neck Cancer	PD-1/PDL-1	10	0	2.59409	0
P-0016241	Samstein et al.(PMID 30643254)	59	Female		Cancer of Unknown Primary	PD-1/PDL-1	15	0	8.64698	0
P-0016243	Samstein et al.(PMID 30643254)	45	Male		Head and Neck Cancer	PD-1/PDL-1	3	1	0	0
P-0016256	Samstein et al.(PMID 30643254)	55	Male		Glioma	PD-1/PDL-1	5	1	3.45879	0
P-0016258	Samstein et al.(PMID 30643254)	53	Female		Cancer of Unknown Primary	PD-1/PDL-1	1	1	10.3764	0
P-0016276	Samstein et al.(PMID 30643254)	86	Female		Melanoma	PD-1/PDL-1	12	0	6.91758	0
P-0016284	Samstein et al.(PMID 30643254)	80	Male		Non-Small Cell Lung Cancer	PD-1/PDL-1	20	0	0.864698	0
P-0016287	Samstein et al.(PMID 30643254)	90	Male		Melanoma	PD-1/PDL-1	11	1	5.18819	0
P-0016289	Samstein et al.(PMID 30643254)	59	Male		Cancer of Unknown Primary	PD-1/PDL-1	8	1	3.45879	0
P-0016290	Samstein et al.(PMID 30643254)	83	Female		Non-Small Cell Lung Cancer	PD-1/PDL-1	2	1	8.64698	0
P-0016308	Samstein et al.(PMID 30643254)	71	Female		Non-Small Cell Lung Cancer	PD-1/PDL-1	14	1	14.6999	0
P-0016311	Samstein et al.(PMID 30643254)	56	Male		Esophagogastric Cancer	PD-1/PDL-1	23	0	3.45879	0
P-0016314	Samstein et al.(PMID 30643254)	63	Female		Colorectal Cancer	PD-1/PDL-1	3	1	109.817	0
P-0016316	Samstein et al.(PMID 30643254)	68	Female		Bladder Cancer	PD-1/PDL-1	22	0	3.45879	0
P-0016340	Samstein et al.(PMID 30643254)	35	Female		Cancer of Unknown Primary	PD-1/PDL-1	1	1	1.7294	0
P-0016402	Samstein et al.(PMID 30643254)	42	Male		Bladder Cancer	PD-1/PDL-1	3	1	1.7294	0
P-0016481	Samstein et al.(PMID 30643254)	62	Male		Non-Small Cell Lung Cancer	PD-1/PDL-1	6	1	19.8881	0
P-0016506	Samstein et al.(PMID 30643254)	46	Female		Melanoma	PD-1/PDL-1	14	0	3.45879	0
P-0016522	Samstein et al.(PMID 30643254)	59	Male		Colorectal Cancer	PD-1/PDL-1	8	0	43.2349	0
P-0016531	Samstein et al.(PMID 30643254)	67	Male		Melanoma	Combo	14	0	3.45879	0
P-0016542	Samstein et al.(PMID 30643254)	80	Male		Non-Small Cell Lung Cancer	PD-1/PDL-1	1	1	19.0234	0
P-0016546	Samstein et al.(PMID 30643254)	73	Male		Bladder Cancer	PD-1/PDL-1	11	1	21.6175	0
P-0016558	Samstein et al.(PMID 30643254)	57	Female		Cancer of Unknown Primary	PD-1/PDL-1	10	1	1.7294	0
P-0016562	Samstein et al.(PMID 30643254)	45	Male		Head and Neck Cancer	PD-1/PDL-1	16	0	7.78228	0
P-0016614	Samstein et al.(PMID 30643254)	60	Female		Non-Small Cell Lung Cancer	PD-1/PDL-1	4	1	7.78228	0
P-0016618	Samstein et al.(PMID 30643254)	81	Female		Bladder Cancer	PD-1/PDL-1	10	0	0.864698	0
P-0016624	Samstein et al.(PMID 30643254)	66	Male		Bladder Cancer	PD-1/PDL-1	14	0	8.64698	0
P-0016634	Samstein et al.(PMID 30643254)	54	Female		Cancer of Unknown Primary	PD-1/PDL-1	10	1	8.64698	0
P-0016646	Samstein et al.(PMID 30643254)	77	Male		Non-Small Cell Lung Cancer	PD-1/PDL-1	4	1	9.51168	0
P-0016648	Samstein et al.(PMID 30643254)	87	Male		Melanoma	PD-1/PDL-1	14	0	1.7294	0
P-0016691	Samstein et al.(PMID 30643254)	54	Male		Glioma	PD-1/PDL-1	13	0	0.864698	0
P-0016697	Samstein et al.(PMID 30643254)	68	Female		Melanoma	PD-1/PDL-1	14	0	0.864698	0
P-0016720	Samstein et al.(PMID 30643254)	69	Male		Bladder Cancer	PD-1/PDL-1	14	0	5.18819	0
P-0016724	Samstein et al.(PMID 30643254)	53	Male		Cancer of Unknown Primary	PD-1/PDL-1	1	1	2.59409	0
P-0016767	Samstein et al.(PMID 30643254)	53	Female		Colorectal Cancer	PD-1/PDL-1	10	0	12.1058	0
P-0016775	Samstein et al.(PMID 30643254)	33	Female		Cancer of Unknown Primary	Combo	5	0	1.7294	0
P-0016782	Samstein et al.(PMID 30643254)	61	Female		Non-Small Cell Lung Cancer	PD-1/PDL-1	3	0	21.6175	0
P-0016809	Samstein et al.(PMID 30643254)	89	Female		Cancer of Unknown Primary	PD-1/PDL-1	13	0	3.45879	0
P-0016835	Samstein et al.(PMID 30643254)	68	Female		Head and Neck Cancer	PD-1/PDL-1	5	0	6.05289	0
P-0016855	Samstein et al.(PMID 30643254)	68	Male		Bladder Cancer	PD-1/PDL-1	12	0	6.91758	0
P-0016875	Samstein et al.(PMID 30643254)	89	Female		Non-Small Cell Lung Cancer	PD-1/PDL-1	1	0	5.18819	1
P-0016910	Samstein et al.(PMID 30643254)	70	Female		Non-Small Cell Lung Cancer	PD-1/PDL-1	13	0	2.59409	0
P-0016915	Samstein et al.(PMID 30643254)	79	Male		Bladder Cancer	PD-1/PDL-1	7	0	8.64698	0
P-0016918	Samstein et al.(PMID 30643254)	62	Male		Cancer of Unknown Primary	PD-1/PDL-1	21	0	12.1058	0
P-0016925	Samstein et al.(PMID 30643254)	71	Male		Bladder Cancer	PD-1/PDL-1	4	1	23.3468	0
P-0016931	Samstein et al.(PMID 30643254)	61	Male		Esophagogastric Cancer	Combo	1	0	6.05289	0
P-0017044	Samstein et al.(PMID 30643254)	53	Male		Bladder Cancer	PD-1/PDL-1	13	0	5.18819	0
P-0017159	Samstein et al.(PMID 30643254)	36	Female		Cancer of Unknown Primary	PD-1/PDL-1	4	0	33.7232	1
P-0017208	Samstein et al.(PMID 30643254)	66	Male		Bladder Cancer	PD-1/PDL-1	3	1	16.4293	0
P-0017241	Samstein et al.(PMID 30643254)	71	Male		Bladder Cancer	PD-1/PDL-1	4	1	4.32349	0
P-0017263	Samstein et al.(PMID 30643254)	74	Male		Colorectal Cancer	PD-1/PDL-1	2	0	3.45879	0
P-0017276	Samstein et al.(PMID 30643254)	60	Male		Bladder Cancer	PD-1/PDL-1	18	1	5.18819	0
P-0017285	Samstein et al.(PMID 30643254)	17	Female		Cancer of Unknown Primary	PD-1/PDL-1	7	0	0.864698	0
P-0017313	Samstein et al.(PMID 30643254)	79	Male		Bladder Cancer	PD-1/PDL-1	19	1	3.45879	0
P-0017370	Samstein et al.(PMID 30643254)	64	Male		Esophagogastric Cancer	PD-1/PDL-1	6	0	37.182	0
P-0017414	Samstein et al.(PMID 30643254)	52	Male		Head and Neck Cancer	PD-1/PDL-1	12	0	0	0
P-0017472	Samstein et al.(PMID 30643254)	80	Male		Bladder Cancer	PD-1/PDL-1	6	0	20.7528	0
P-0017508	Samstein et al.(PMID 30643254)	68	Female		Head and Neck Cancer	PD-1/PDL-1	2	1	4.32349	0
P-0017599	Samstein et al.(PMID 30643254)	72	Male		Bladder Cancer	PD-1/PDL-1	7	1	5.87232	0
P-0017602	Samstein et al.(PMID 30643254)	43	Female		Cancer of Unknown Primary	Combo	1	1	2.93616	0
P-0017658	Samstein et al.(PMID 30643254)	76	Male		Bladder Cancer	PD-1/PDL-1	3	0	9.7872	0
P-0017678	Samstein et al.(PMID 30643254)	47	Male		Head and Neck Cancer	PD-1/PDL-1	14	0	9.51168	0
P-0017687	Samstein et al.(PMID 30643254)	76	Female		Head and Neck Cancer	PD-1/PDL-1	11	0	7.78228	0
P-0017697	Samstein et al.(PMID 30643254)	60	Female		Colorectal Cancer	PD-1/PDL-1	8	1	89.9286	1
P-0017712	Samstein et al.(PMID 30643254)	70	Male		Bladder Cancer	PD-1/PDL-1	2	1	7.78228	0
P-0017717	Samstein et al.(PMID 30643254)	66	Male		Head and Neck Cancer	PD-1/PDL-1	12	0	4.32349	0
P-0017755	Samstein et al.(PMID 30643254)	68	Female		Cancer of Unknown Primary	PD-1/PDL-1	3	0	2.59409	0
P-0017766	Samstein et al.(PMID 30643254)	66	Male		Colorectal Cancer	Combo	6	0	7.78228	0
P-0017769	Samstein et al.(PMID 30643254)	39	Male		Head and Neck Cancer	PD-1/PDL-1	9	1	6.05289	0
P-0017986	Samstein et al.(PMID 30643254)	33	Female		Colorectal Cancer	PD-1/PDL-1	2	0	60.5289	0
P-0018028	Samstein et al.(PMID 30643254)	72	Male		Bladder Cancer	PD-1/PDL-1	3	1	7.78228	0
P-0018143	Samstein et al.(PMID 30643254)	70	Female		Esophagogastric Cancer	PD-1/PDL-1	0	1	5.18819	0
P-0018185	Samstein et al.(PMID 30643254)	49	Female		Head and Neck Cancer	PD-1/PDL-1	14	0	4.32349	0
P-0018188	Samstein et al.(PMID 30643254)	61	Female		Head and Neck Cancer	PD-1/PDL-1	4	1	7.78228	0
P-0018216	Samstein et al.(PMID 30643254)	62	Male		Bladder Cancer	PD-1/PDL-1	1	0	8.64698	0
P-0018229	Samstein et al.(PMID 30643254)	71	Female		Bladder Cancer	PD-1/PDL-1	5	0	4.32349	0
P-0018277	Samstein et al.(PMID 30643254)	27	Male		Colorectal Cancer	Combo	1	0	8.64698	0
P-0018340	Samstein et al.(PMID 30643254)	71	Male		Esophagogastric Cancer	PD-1/PDL-1	12	0	4.32349	0
P-0018341	Samstein et al.(PMID 30643254)	54	Female		Cancer of Unknown Primary	PD-1/PDL-1	2	0	3.45879	0
P-0018371	Samstein et al.(PMID 30643254)	73	Male		Esophagogastric Cancer	PD-1/PDL-1	13	0	4.32349	0
P-0018457	Samstein et al.(PMID 30643254)	51	Male		Cancer of Unknown Primary	PD-1/PDL-1	2	1	2.59409	0
P-0018464	Samstein et al.(PMID 30643254)	26	Male		Esophagogastric Cancer	PD-1/PDL-1	22	0	6.05289	0
P-0018541	Samstein et al.(PMID 30643254)	79	Male		Bladder Cancer	PD-1/PDL-1	3	0	7.78228	0
P-0018563	Samstein et al.(PMID 30643254)	64	Female		Cancer of Unknown Primary	PD-1/PDL-1	6	1	16.4293	0
P-0018568	Samstein et al.(PMID 30643254)	65	Female		Esophagogastric Cancer	PD-1/PDL-1	12	0	5.18819	0
P-0018580	Samstein et al.(PMID 30643254)	41	Female		Colorectal Cancer	PD-1/PDL-1	5	1	4.32349	0
P-0018601	Samstein et al.(PMID 30643254)	56	Male		Cancer of Unknown Primary	PD-1/PDL-1	1	1	6.05289	0
P-0018665	Samstein et al.(PMID 30643254)	43	Male		Cancer of Unknown Primary	Combo	1	0	7.78228	0
P-0018671	Samstein et al.(PMID 30643254)	76	Male		Cancer of Unknown Primary	PD-1/PDL-1	15	0	1.7294	0
P-0018673	Samstein et al.(PMID 30643254)	78	Female		Cancer of Unknown Primary	PD-1/PDL-1	14	0	28.535	0
P-0018683	Samstein et al.(PMID 30643254)	63	Female		Esophagogastric Cancer	PD-1/PDL-1	9	0	6.05289	0
P-0018771	Samstein et al.(PMID 30643254)	71	Male		Esophagogastric Cancer	PD-1/PDL-1	13	0	8.64698	0
P-0018782	Samstein et al.(PMID 30643254)	62	Male		Esophagogastric Cancer	Combo	10	0	1.7294	0
P-0018800	Samstein et al.(PMID 30643254)	49	Male		Esophagogastric Cancer	Combo	3	0	8.64698	0
P-0018925	Samstein et al.(PMID 30643254)	69	Male		Head and Neck Cancer	PD-1/PDL-1	2	1	17.294	0
P-0018927	Samstein et al.(PMID 30643254)	68	Female		Esophagogastric Cancer	Combo	13	0	6.91758	0
P-0018931	Samstein et al.(PMID 30643254)	66	Female		Cancer of Unknown Primary	Combo	1	0	4.32349	0
P-0018960	Samstein et al.(PMID 30643254)	60	Female		Cancer of Unknown Primary	PD-1/PDL-1	2	1	10.3764	0
P-0018986	Samstein et al.(PMID 30643254)	73	Female		Esophagogastric Cancer	PD-1/PDL-1	12	0	10.3764	0
P-0019003	Samstein et al.(PMID 30643254)	81	Male		Cancer of Unknown Primary	PD-1/PDL-1	1	0	4.32349	0
P-0019012	Samstein et al.(PMID 30643254)	80	Male		Cancer of Unknown Primary	PD-1/PDL-1	11	1	1.7294	0
P-0019027	Samstein et al.(PMID 30643254)	40	Female		Cancer of Unknown Primary	PD-1/PDL-1	5	1	4.32349	0
P-0019034	Samstein et al.(PMID 30643254)	61	Female		Cancer of Unknown Primary	PD-1/PDL-1	10	0	0	0
P-0019036	Samstein et al.(PMID 30643254)	58	Male		Bladder Cancer	PD-1/PDL-1	6	0	5.18819	0
P-0019101	Samstein et al.(PMID 30643254)	52	Female		Bladder Cancer	PD-1/PDL-1	4	0	15.5646	0
P-0019226	Samstein et al.(PMID 30643254)	29	Male		Head and Neck Cancer	PD-1/PDL-1	9	0	3.45879	0
P-0019240	Samstein et al.(PMID 30643254)	59	Male		Head and Neck Cancer	PD-1/PDL-1	3	1	0.864698	0
P-0019258	Samstein et al.(PMID 30643254)	62	Male		Head and Neck Cancer	PD-1/PDL-1	3	1	6.91758	0
P-0019267	Samstein et al.(PMID 30643254)	50	Female		Colorectal Cancer	PD-1/PDL-1	7	0	5.18819	0
P-0019271	Samstein et al.(PMID 30643254)	32	Male		Esophagogastric Cancer	Combo	9	0	6.91758	0
P-0019272	Samstein et al.(PMID 30643254)	47	Female		Esophagogastric Cancer	PD-1/PDL-1	12	0	7.78228	0
P-0019297	Samstein et al.(PMID 30643254)	44	Female		Head and Neck Cancer	PD-1/PDL-1	11	0	4.32349	0
P-0019316	Samstein et al.(PMID 30643254)	52	Male		Head and Neck Cancer	PD-1/PDL-1	10	1	8.64698	0
P-0019351	Samstein et al.(PMID 30643254)	62	Male		Esophagogastric Cancer	PD-1/PDL-1	10	0	5.18819	0
P-0019407	Samstein et al.(PMID 30643254)	77	Male		Head and Neck Cancer	PD-1/PDL-1	5	1	12.1058	0
P-0019413	Samstein et al.(PMID 30643254)	62	Male		Esophagogastric Cancer	PD-1/PDL-1	2	0	6.91758	0
P-0019417	Samstein et al.(PMID 30643254)	75	Male		Bladder Cancer	PD-1/PDL-1	14	1	15.5646	0
P-0019428	Samstein et al.(PMID 30643254)	70	Female		Colorectal Cancer	PD-1/PDL-1	5	0	44.0996	0
P-0019475	Samstein et al.(PMID 30643254)	47	Male		Colorectal Cancer	PD-1/PDL-1	1	1	91.658	1
P-0019540	Samstein et al.(PMID 30643254)	46	Male		Head and Neck Cancer	PD-1/PDL-1	2	1	6.05289	0
P-0019648	Samstein et al.(PMID 30643254)	67	Male		Cancer of Unknown Primary	PD-1/PDL-1	9	0	0.864698	0
P-0019657	Samstein et al.(PMID 30643254)	70	Male		Esophagogastric Cancer	PD-1/PDL-1	3	1	5.18819	0
P-0019691	Samstein et al.(PMID 30643254)	48	Male		Esophagogastric Cancer	PD-1/PDL-1	8	0	26.8056	0
P-0019710	Samstein et al.(PMID 30643254)	56	Male		Colorectal Cancer	PD-1/PDL-1	7	1	6.05289	0
P-0019717	Samstein et al.(PMID 30643254)	63	Male		Bladder Cancer	PD-1/PDL-1	12	0	13.8352	0
P-0019754	Samstein et al.(PMID 30643254)	60	Male		Esophagogastric Cancer	PD-1/PDL-1	10	0	5.18819	0
P-0019771	Samstein et al.(PMID 30643254)	55	Female		Bladder Cancer	PD-1/PDL-1	7	0	6.05289	0
P-0019916	Samstein et al.(PMID 30643254)	44	Female		Esophagogastric Cancer	Combo	2	0	3.45879	0
P-0019949	Samstein et al.(PMID 30643254)	28	Male		Colorectal Cancer	PD-1/PDL-1	8	0	37.182	0
P-0020040	Samstein et al.(PMID 30643254)	62	Male		Head and Neck Cancer	PD-1/PDL-1	10	1	3.45879	0
P-0020047	Samstein et al.(PMID 30643254)	76	Female		Bladder Cancer	PD-1/PDL-1	12	0	8.64698	0
P-0020065	Samstein et al.(PMID 30643254)	73	Male		Bladder Cancer	PD-1/PDL-1	10	0	16.4293	0
P-0020086	Samstein et al.(PMID 30643254)	80	Female		Bladder Cancer	PD-1/PDL-1	10	0	16.4293	0
P-0020109	Samstein et al.(PMID 30643254)	66	Male		Esophagogastric Cancer	PD-1/PDL-1	3	1	6.05289	0
P-0020113	Samstein et al.(PMID 30643254)	51	Male		Head and Neck Cancer	PD-1/PDL-1	9	1	2.59409	0
P-0020121	Samstein et al.(PMID 30643254)	79	Female		Bladder Cancer	PD-1/PDL-1	8	0	15.5646	0
P-0020122	Samstein et al.(PMID 30643254)	64	Female		Bladder Cancer	PD-1/PDL-1	9	0	21.6175	1
P-0020140	Samstein et al.(PMID 30643254)	73	Male		Cancer of Unknown Primary	PD-1/PDL-1	5	1	9.51168	0
P-0020146	Samstein et al.(PMID 30643254)	67	Female		Head and Neck Cancer	PD-1/PDL-1	2	1	10.3764	0
P-0020147	Samstein et al.(PMID 30643254)	69	Male		Head and Neck Cancer	PD-1/PDL-1	9	0	5.18819	0
P-0020156	Samstein et al.(PMID 30643254)	67	Female		Head and Neck Cancer	PD-1/PDL-1	8	0	17.294	0
P-0020167	Samstein et al.(PMID 30643254)	71	Male		Bladder Cancer	PD-1/PDL-1	2	1	4.32349	0
P-0020169	Samstein et al.(PMID 30643254)	59	Male		Esophagogastric Cancer	PD-1/PDL-1	4	1	6.05289	0
P-0020175	Samstein et al.(PMID 30643254)	70	Male		Esophagogastric Cancer	PD-1/PDL-1	8	0	4.32349	0
P-0020226	Samstein et al.(PMID 30643254)	48	Male		Esophagogastric Cancer	PD-1/PDL-1	9	0	0.864698	0
P-0020252	Samstein et al.(PMID 30643254)	66	Female		Colorectal Cancer	PD-1/PDL-1	9	0	63.123	1
P-0020399	Samstein et al.(PMID 30643254)	62	Male		Colorectal Cancer	PD-1/PDL-1	15	0	60.5289	0
P-0020422	Samstein et al.(PMID 30643254)	67	Female		Cancer of Unknown Primary	PD-1/PDL-1	3	1	26.8056	0
P-0020489	Samstein et al.(PMID 30643254)	65	Male		Cancer of Unknown Primary	PD-1/PDL-1	9	1	8.64698	0
P-0020542	Samstein et al.(PMID 30643254)	73	Male		Bladder Cancer	PD-1/PDL-1	12	0	4.32349	0
P-0020591	Samstein et al.(PMID 30643254)	74	Male		Cancer of Unknown Primary	PD-1/PDL-1	3	0	19.8881	1
P-0020592	Samstein et al.(PMID 30643254)	75	Male		Bladder Cancer	PD-1/PDL-1	9	0	6.05289	0
P-0020594	Samstein et al.(PMID 30643254)	69	Female		Cancer of Unknown Primary	PD-1/PDL-1	4	1	5.18819	0
P-0020649	Samstein et al.(PMID 30643254)	63	Male		Head and Neck Cancer	PD-1/PDL-1	8	0	1.7294	0
P-0020714	Samstein et al.(PMID 30643254)	62	Female		Cancer of Unknown Primary	PD-1/PDL-1	1	1	2.59409	0
P-0020770	Samstein et al.(PMID 30643254)	66	Male		Cancer of Unknown Primary	Combo	4	0	5.18819	0
P-0020835	Samstein et al.(PMID 30643254)	65	Male		Bladder Cancer	PD-1/PDL-1	8	0	6.91758	0
P-0020846	Samstein et al.(PMID 30643254)	62	Male		Head and Neck Cancer	PD-1/PDL-1	3	1	4.32349	0
P-0020878	Samstein et al.(PMID 30643254)	46	Male		Colorectal Cancer	PD-1/PDL-1	18	0	2.59409	0
P-0020903	Samstein et al.(PMID 30643254)	56	Male		Esophagogastric Cancer	PD-1/PDL-1	8	0	6.05289	0
P-0020965	Samstein et al.(PMID 30643254)	60	Male		Head and Neck Cancer	PD-1/PDL-1	4	1	4.32349	0
P-0020986	Samstein et al.(PMID 30643254)	76	Female		Cancer of Unknown Primary	PD-1/PDL-1	14	0	13.8352	0
P-0020995	Samstein et al.(PMID 30643254)	63	Male		Bladder Cancer	Combo	5	1	5.18819	0
P-0021004	Samstein et al.(PMID 30643254)	81	Male		Bladder Cancer	PD-1/PDL-1	5	0	5.18819	0
P-0021255	Samstein et al.(PMID 30643254)	65	Male		Bladder Cancer	PD-1/PDL-1	5	0	14.6999	0
P-0021266	Samstein et al.(PMID 30643254)	54	Female		Cancer of Unknown Primary	PD-1/PDL-1	6	0	22.4822	0
P-0021304	Samstein et al.(PMID 30643254)	50	Male		Colorectal Cancer	PD-1/PDL-1	6	0	83.8757	1
P-0021403	Samstein et al.(PMID 30643254)	72	Male		Esophagogastric Cancer	Combo	1	0	6.05289	0
P-0021454	Samstein et al.(PMID 30643254)	71	Female		Cancer of Unknown Primary	PD-1/PDL-1	7	0	7.78228	0
P-0021471	Samstein et al.(PMID 30643254)	66	Female		Bladder Cancer	PD-1/PDL-1	6	0	6.05289	0
P-0021474	Samstein et al.(PMID 30643254)	68	Male		Head and Neck Cancer	PD-1/PDL-1	51	0	2.59409	0
P-0021484	Samstein et al.(PMID 30643254)	65	Male		Bladder Cancer	PD-1/PDL-1	9	0	12.1058	0
P-0021503	Samstein et al.(PMID 30643254)	73	Male		Bladder Cancer	PD-1/PDL-1	7	1	20.7528	0
P-0021507	Samstein et al.(PMID 30643254)	64	Male		Cancer of Unknown Primary	PD-1/PDL-1	1	1	8.64698	0
P-0021528	Samstein et al.(PMID 30643254)	86	Male		Bladder Cancer	PD-1/PDL-1	11	0	13.8352	1
P-0021532	Samstein et al.(PMID 30643254)	79	Female		Bladder Cancer	PD-1/PDL-1	7	0	12.9705	0
P-0021621	Samstein et al.(PMID 30643254)	53	Female		Head and Neck Cancer	PD-1/PDL-1	19	0	3.45879	0
P-0021622	Samstein et al.(PMID 30643254)	74	Male		Bladder Cancer	PD-1/PDL-1	8	0	7.78228	0
P-0021644	Samstein et al.(PMID 30643254)	84	Male		Bladder Cancer	PD-1/PDL-1	9	0	0	0
P-0021651	Samstein et al.(PMID 30643254)	76	Male		Cancer of Unknown Primary	Combo	2	0	10.3764	0
P-0021756	Samstein et al.(PMID 30643254)	53	Male		Cancer of Unknown Primary	PD-1/PDL-1	5	0	1.7294	0
P-0021774	Samstein et al.(PMID 30643254)	59	Male		Cancer of Unknown Primary	PD-1/PDL-1	6	0	88.1992	1
P-0021834	Samstein et al.(PMID 30643254)	64	Male		Colorectal Cancer	PD-1/PDL-1	27	0	6.05289	0
P-0021841	Samstein et al.(PMID 30643254)	50	Female		Cancer of Unknown Primary	PD-1/PDL-1	6	0	5.18819	0
P-0021848	Samstein et al.(PMID 30643254)	60	Male		Bladder Cancer	PD-1/PDL-1	4	1	4.32349	0
P-0021911	Samstein et al.(PMID 30643254)	70	Female		Cancer of Unknown Primary	PD-1/PDL-1	4	1	6.91758	0
P-0021915	Samstein et al.(PMID 30643254)	65	Male		Head and Neck Cancer	PD-1/PDL-1	7	1	6.91758	0
P-0021993	Samstein et al.(PMID 30643254)	64	Female		Esophagogastric Cancer	PD-1/PDL-1	5	0	4.32349	0
P-0022001	Samstein et al.(PMID 30643254)	67	Female		Cancer of Unknown Primary	PD-1/PDL-1	2	0	2.59409	0
P-0022034	Samstein et al.(PMID 30643254)	51	Male		Bladder Cancer	PD-1/PDL-1	2	1	0.864698	0
P-0022068	Samstein et al.(PMID 30643254)	83	Female		Bladder Cancer	PD-1/PDL-1	3	0	6.91758	0
P-0022154	Samstein et al.(PMID 30643254)	76	Male		Esophagogastric Cancer	PD-1/PDL-1	7	0	2.59409	1
P-0022441	Samstein et al.(PMID 30643254)	70	Female		Head and Neck Cancer	PD-1/PDL-1	3	0	11.2411	0
P-0022502	Samstein et al.(PMID 30643254)	62	Male		Head and Neck Cancer	PD-1/PDL-1	6	0	12.1058	0
P-0022510	Samstein et al.(PMID 30643254)	71	Male		Esophagogastric Cancer	PD-1/PDL-1	6	1	5.18819	0
P-0022520	Samstein et al.(PMID 30643254)	48	Male		Bladder Cancer	PD-1/PDL-1	6	0	68.3111	1
P-0022543	Samstein et al.(PMID 30643254)	22	Male		Cancer of Unknown Primary	PD-1/PDL-1	3	0	4.32349	1
P-0022688	Samstein et al.(PMID 30643254)	59	Male		Esophagogastric Cancer	PD-1/PDL-1	6	0	3.45879	0
P-0022703	Samstein et al.(PMID 30643254)	75	Male		Cancer of Unknown Primary	PD-1/PDL-1	6	0	6.05289	0
P-0022788	Samstein et al.(PMID 30643254)	54	Male		Esophagogastric Cancer	Combo	4	0	8.64698	0
P-0022847	Samstein et al.(PMID 30643254)	68	Male		Esophagogastric Cancer	PD-1/PDL-1	5	1	5.18819	0
P-0022952	Samstein et al.(PMID 30643254)	55	Male		Esophagogastric Cancer	PD-1/PDL-1	9	0	6.91758	0
P-0022977	Samstein et al.(PMID 30643254)	48	Female		Colorectal Cancer	PD-1/PDL-1	5	0	2.59409	0
P-0022995	Samstein et al.(PMID 30643254)	62	Male		Esophagogastric Cancer	PD-1/PDL-1	7	1	5.18819	0
P-0023015	Samstein et al.(PMID 30643254)	75	Male		Head and Neck Cancer	PD-1/PDL-1	3	0	6.91758	0
P-0023086	Samstein et al.(PMID 30643254)	56	Male		Cancer of Unknown Primary	PD-1/PDL-1	1	0	4.32349	0
P-0023128	Samstein et al.(PMID 30643254)	44	Male		Colorectal Cancer	PD-1/PDL-1	11	0	12.1058	0
P-0023138	Samstein et al.(PMID 30643254)	76	Male		Bladder Cancer	PD-1/PDL-1	8	1	10.3764	0
P-0023194	Samstein et al.(PMID 30643254)	59	Male		Esophagogastric Cancer	PD-1/PDL-1	5	0	2.59409	0
P-0023425	Samstein et al.(PMID 30643254)	58	Male		Bladder Cancer	PD-1/PDL-1	6	1	11.2411	0
P-0023450	Samstein et al.(PMID 30643254)	83	Male		Bladder Cancer	PD-1/PDL-1	2	0	16.4293	0
P-0023553	Samstein et al.(PMID 30643254)	56	Male		Esophagogastric Cancer	PD-1/PDL-1	10	0	9.51168	0
P-0023557	Samstein et al.(PMID 30643254)	58	Male		Head and Neck Cancer	PD-1/PDL-1	5	0	5.18819	0
P-0023603	Samstein et al.(PMID 30643254)	62	Male		Esophagogastric Cancer	PD-1/PDL-1	3	1	7.78228	0
P-0023627	Samstein et al.(PMID 30643254)	54	Male		Esophagogastric Cancer	PD-1/PDL-1	8	0	0	0
P-0023731	Samstein et al.(PMID 30643254)	56	Female		Colorectal Cancer	PD-1/PDL-1	2	0	6.05289	0
P-0023749	Samstein et al.(PMID 30643254)	55	Male		Head and Neck Cancer	PD-1/PDL-1	2	0	6.91758	0
P-0023785	Samstein et al.(PMID 30643254)	59	Male		Cancer of Unknown Primary	PD-1/PDL-1	4	0	16.4293	0
P-0023790	Samstein et al.(PMID 30643254)	35	Female		Cancer of Unknown Primary	PD-1/PDL-1	4	0	4.32349	0
P-0023896	Samstein et al.(PMID 30643254)	71	Male		Head and Neck Cancer	PD-1/PDL-1	14	0	3.45879	0
P-0023948	Samstein et al.(PMID 30643254)	75	Male		Head and Neck Cancer	PD-1/PDL-1	4	0	14.6999	1
P-0023963	Samstein et al.(PMID 30643254)	82	Female		Esophagogastric Cancer	PD-1/PDL-1	2	0	24.2115	0
P-0023966	Samstein et al.(PMID 30643254)	83	Male		Cancer of Unknown Primary	Combo	3	0	20.7528	1
P-0024054	Samstein et al.(PMID 30643254)	67	Male		Esophagogastric Cancer	PD-1/PDL-1	4	0	8.64698	0
P-0024068	Samstein et al.(PMID 30643254)	70	Female		Esophagogastric Cancer	PD-1/PDL-1	1	0	31.9938	0
P-0024084	Samstein et al.(PMID 30643254)	74	Male		Cancer of Unknown Primary	PD-1/PDL-1	3	0	0.864698	0
P-0024205	Samstein et al.(PMID 30643254)	60	Male		Esophagogastric Cancer	PD-1/PDL-1	3	0	6.91758	0
P-0024243	Samstein et al.(PMID 30643254)	56	Female		Esophagogastric Cancer	PD-1/PDL-1	2	0	42.3702	0
P-0024263	Samstein et al.(PMID 30643254)	70	Male		Bladder Cancer	PD-1/PDL-1	3	0	6.05289	1
P-0024270	Samstein et al.(PMID 30643254)	50	Male		Esophagogastric Cancer	Combo	2	0	4.32349	0
P-0024386	Samstein et al.(PMID 30643254)	51	Male		Head and Neck Cancer	PD-1/PDL-1	2	0	6.91758	0
P-0024419	Samstein et al.(PMID 30643254)	60	Male		Esophagogastric Cancer	PD-1/PDL-1	4	0	0	0
P-0024527	Samstein et al.(PMID 30643254)	57	Male		Esophagogastric Cancer	Combo	7	0	2.59409	0
P-0024530	Samstein et al.(PMID 30643254)	64	Male		Esophagogastric Cancer	PD-1/PDL-1	4	0	6.05289	0
P-0024544	Samstein et al.(PMID 30643254)	79	Female		Bladder Cancer	PD-1/PDL-1	16	0	34.5879	0
P-0024576	Samstein et al.(PMID 30643254)	62	Male		Head and Neck Cancer	PD-1/PDL-1	3	0	8.64698	1
P-0024731	Samstein et al.(PMID 30643254)	78	Male		Skin Cancer, Non-Melanoma	PD-1/PDL-1	2	0	63.9877	1
P-0024753	Samstein et al.(PMID 30643254)	21	Female		Cancer of Unknown Primary	PD-1/PDL-1	3	0	0.864698	0
P-0024795	Samstein et al.(PMID 30643254)	72	Female		Bladder Cancer	PD-1/PDL-1	3	0	11.2411	0
P-0024824	Samstein et al.(PMID 30643254)	55	Male		Colorectal Cancer	PD-1/PDL-1	3	0	10.3764	0
P-0024827	Samstein et al.(PMID 30643254)	74	Male		Bladder Cancer	PD-1/PDL-1	1	0	6.91758	0
P-0024866	Samstein et al.(PMID 30643254)	68	Male		Head and Neck Cancer	PD-1/PDL-1	3	0	57.9348	0
P-0025079	Samstein et al.(PMID 30643254)	82	Male		Bladder Cancer	PD-1/PDL-1	6	0	2.59409	0
P-0025115	Samstein et al.(PMID 30643254)	59	Male		Cancer of Unknown Primary	PD-1/PDL-1	2	0	12.9705	0
P-0025120	Samstein et al.(PMID 30643254)	59	Female		Bladder Cancer	PD-1/PDL-1	4	0	3.45879	0
P-0025146	Samstein et al.(PMID 30643254)	73	Male		Esophagogastric Cancer	PD-1/PDL-1	5	0	0.864698	0
P-0025174	Samstein et al.(PMID 30643254)	64	Female		Bladder Cancer	PD-1/PDL-1	6	0	3.45879	0
P-0025224	Samstein et al.(PMID 30643254)	48	Male		Esophagogastric Cancer	PD-1/PDL-1	4	0	12.9705	0
P-0025313	Samstein et al.(PMID 30643254)	83	Female		Bladder Cancer	PD-1/PDL-1	8	0	4.32349	0
P-0025373	Samstein et al.(PMID 30643254)	61	Male		Head and Neck Cancer	PD-1/PDL-1	1	0	11.2411	1
P-0025394	Samstein et al.(PMID 30643254)	73	Male		Esophagogastric Cancer	Combo	2	0	6.91758	0
P-0025471	Samstein et al.(PMID 30643254)	43	Male		Esophagogastric Cancer	PD-1/PDL-1	2	0	3.45879	0
P-0025532	Samstein et al.(PMID 30643254)	68	Female		Colorectal Cancer	PD-1/PDL-1	3	0	40.6408	0
P-0025544	Samstein et al.(PMID 30643254)	52	Male		Head and Neck Cancer	PD-1/PDL-1	3	0	7.78228	0
P-0025720	Samstein et al.(PMID 30643254)	61	Male		Head and Neck Cancer	PD-1/PDL-1	2	0	6.05289	0
P-0025766	Samstein et al.(PMID 30643254)	80	Male		Cancer of Unknown Primary	PD-1/PDL-1	2	0	4.32349	0
P-0025827	Samstein et al.(PMID 30643254)	71	Male		Bladder Cancer	PD-1/PDL-1	4	0	7.78228	0
P-0025888	Samstein et al.(PMID 30643254)	80	Female		Bladder Cancer	PD-1/PDL-1	8	0	4.32349	0
P-0026063	Samstein et al.(PMID 30643254)	81	Male		Cancer of Unknown Primary	PD-1/PDL-1	8	0	14.6999	1
P-0026114	Samstein et al.(PMID 30643254)	75	Female		Esophagogastric Cancer	PD-1/PDL-1	2	0	4.32349	0
P-0026160	Samstein et al.(PMID 30643254)	80	Male		Bladder Cancer	PD-1/PDL-1	1	0	1.7294	0
P-0026250	Samstein et al.(PMID 30643254)	74	Female		Esophagogastric Cancer	PD-1/PDL-1	3	0	3.45879	0
P-0026282	Samstein et al.(PMID 30643254)	67	Male		Head and Neck Cancer	PD-1/PDL-1	3	0	2.59409	0
P-0026298	Samstein et al.(PMID 30643254)	62	Male		Cancer of Unknown Primary	PD-1/PDL-1	1	0	4.32349	0
P-0026350	Samstein et al.(PMID 30643254)	79	Male		Cancer of Unknown Primary	Combo	1	0	58.7995	0
P-0026723	Samstein et al.(PMID 30643254)	58	Male		Bladder Cancer	PD-1/PDL-1	1	0	6.91758	0
P-0026892	Samstein et al.(PMID 30643254)	89	Male		Bladder Cancer	PD-1/PDL-1	3	0	6.05289	0
P-0026970	Samstein et al.(PMID 30643254)	62	Male		Bladder Cancer	PD-1/PDL-1	4	0	25.9409	0
P-0027031	Samstein et al.(PMID 30643254)	32	Female		Esophagogastric Cancer	PD-1/PDL-1	5	0	2.59409	0
P-0027041	Samstein et al.(PMID 30643254)	68	Female		Cancer of Unknown Primary	PD-1/PDL-1	41	0	6.05289	0
P-0027346	Samstein et al.(PMID 30643254)	76	Male		Bladder Cancer	PD-1/PDL-1	3	0	6.05289	0
Pt1	Hugo et al.(PMID 26997480)	66	Female	PD	Melanoma	Anti-PD-1	20.2333	1	63	0
Pt10	Hugo et al.(PMID 26997480)	60	Male	PD	Melanoma	Anti-PD-1	12.9	0	8.26667	0
Pt11	Hugo et al.(PMID 26997480)	37	Male	PD	Melanoma	Anti-PD-1	15.5667	1	8.66667	0
Pt12	Hugo et al.(PMID 26997480)	59	Male	PD	Melanoma	Anti-PD-1	10.9	1	4.5	0
Pt13	Hugo et al.(PMID 26997480)	53	Female	CR	Melanoma	Anti-PD-1	30.5667	0	16.5333	0
Pt14	Hugo et al.(PMID 26997480)	27	Female	PD	Melanoma	Anti-PD-1	1.8	0	40.9	0
Pt15	Hugo et al.(PMID 26997480)	70	Male	PR	Melanoma	Anti-PD-1	32.6667	1	26.7667	0
Pt16	Hugo et al.(PMID 26997480)	19	Male	PD	Melanoma	Anti-PD-1	6.2	1	18.7	1
Pt17	Hugo et al.(PMID 26997480)	67	Male	PD	Melanoma	Anti-PD-1	31.7667	1	22.7	0
Pt18	Hugo et al.(PMID 26997480)	64	Male	PR	Melanoma	Anti-PD-1	36.0333	0	6.33333	0
Pt19	Hugo et al.(PMID 26997480)	45	Male	PR	Melanoma	Anti-PD-1	35.3333	0	22.5333	0
Pt2	Hugo et al.(PMID 26997480)	55	Male	PR	Melanoma	Anti-PD-1	30.9	0	68.3667	0
Pt20	Hugo et al.(PMID 26997480)	63	Female	PD	Melanoma	Anti-PD-1	11.2333	1	22.7333	0
Pt21	Hugo et al.(PMID 26997480)	60	Male	PR	Melanoma	Anti-PD-1	31.5	1	3.56667	0
Pt22	Hugo et al.(PMID 26997480)	55	Male	PD	Melanoma	Anti-PD-1	6.06667	1	8.3	0
Pt23	Hugo et al.(PMID 26997480)	63	Male	PD	Melanoma	Anti-PD-1	3.43333	1	10.4	0
Pt24	Hugo et al.(PMID 26997480)	70	Male	PR	Melanoma	Anti-PD-1	32.4667	1	12.7333	0
Pt25	Hugo et al.(PMID 26997480)	74	Male	PD	Melanoma	Anti-PD-1	8.73333	1	5.1	0
Pt26	Hugo et al.(PMID 26997480)	71	Male	CR	Melanoma	Anti-PD-1	44.5333	0	41.7	0
Pt27	Hugo et al.(PMID 26997480)	83	Male	CR	Melanoma	Anti-PD-1	18.2667	0	37.8667	0
Pt28	Hugo et al.(PMID 26997480)	82	Male	PR	Melanoma	Anti-PD-1	14.6333	1	30.0333	0
Pt29	Hugo et al.(PMID 26997480)	84	Male	PD	Melanoma	Anti-PD-1	8.96667	1	10	0
Pt3	Hugo et al.(PMID 26997480)	58	Male	PR	Melanoma	Anti-PD-1	23.0333	1	27.8	0
Pt30	Hugo et al.(PMID 26997480)	80	Female	PD	Melanoma	Anti-PD-1	3.33333	1	18.5667	0
Pt31	Hugo et al.(PMID 26997480)	47	Male	PD	Melanoma	Anti-PD-1	23.4667	0	19.1	0
Pt32	Hugo et al.(PMID 26997480)	47	Male	PD	Melanoma	Anti-PD-1	5.7	1	5.8	0
Pt33	Hugo et al.(PMID 26997480)	80	Female	CR	Melanoma	Anti-PD-1	72.5667	0	23.6333	0
Pt34	Hugo et al.(PMID 26997480)	42	Male	CR	Melanoma	Anti-PD-1	13.9333	0	3.83333	0
Pt35	Hugo et al.(PMID 26997480)	65	Female	PR	Melanoma	Anti-PD-1	14.2333	0	8.03333	0
Pt36	Hugo et al.(PMID 26997480)	61	Female	PD	Melanoma	Anti-PD-1	27.9	1	3.46667	0
Pt37	Hugo et al.(PMID 26997480)	70	Female	PR	Melanoma	Anti-PD-1	12.1333	0	15.7	1
Pt38	Hugo et al.(PMID 26997480)	57	Female	PR	Melanoma	Anti-PD-1	14.9333	0	4.66667	0
Pt4	Hugo et al.(PMID 26997480)	62	Male	PR	Melanoma	Anti-PD-1	31.6	0	136.833	1
Pt5	Hugo et al.(PMID 26997480)	61	Male	PR	Melanoma	Anti-PD-1	14.6333	0	11.3333	0
Pt6	Hugo et al.(PMID 26997480)	51	Male	PR	Melanoma	Anti-PD-1	29.4	0	8.26667	0
Pt7	Hugo et al.(PMID 26997480)	55	Female	PD	Melanoma	Anti-PD-1	22.0667	1	41.7	0
Pt9	Hugo et al.(PMID 26997480)	68	Male	CR	Melanoma	Anti-PD-1	35.1333	0	19.4	0
RCC_1	Miao et al.(PMID 29301960)	49	Male	PD	Renal Clear Cell Carcinoma	Anti-PD-1/PD-L1	1.43333	0	2.83333	0
RCC_10	Miao et al.(PMID 29301960)	64	Female	SD	Renal Clear Cell Carcinoma	Anti-PD-1/PD-L1	35.2667	0	3	0
RCC_102	Miao et al.(PMID 29301960)	64	Male	SD	Renal Clear Cell Carcinoma	Anti-PD-1/PD-L1	5.5	0	3.7	1
RCC_105	Miao et al.(PMID 29301960)	64	Male	PD	Renal Clear Cell Carcinoma	Anti-PD-1/PD-L1	3.93333	1	2.3	0
RCC_106	Miao et al.(PMID 29301960)	61	Female	PR	Renal Clear Cell Carcinoma	Anti-PD-1/PD-L1	29	0	1.76667	0
RCC_11	Miao et al.(PMID 29301960)	50	Male	SD	Renal Clear Cell Carcinoma	Anti-PD-1/PD-L1	34.1333	0	2.7	0
RCC_114	Miao et al.(PMID 29301960)	57	Female	PR	Renal Clear Cell Carcinoma	Anti-PD-1/PD-L1	11.3333	0	1.63333	0
RCC_115	Miao et al.(PMID 29301960)	60	Male	SD	Renal Clear Cell Carcinoma	Anti-PD-1/PD-L1	12.2	0	2.76667	0
RCC_117	Miao et al.(PMID 29301960)	58	Male	SD	Renal Clear Cell Carcinoma	Anti-PD-1/PD-L1	2.13333	0	2.83333	0
RCC_119	Miao et al.(PMID 29301960)	72	Male	PR	Renal Clear Cell Carcinoma	Anti-PD-1/PD-L1	25.7667	0	3.46667	0
RCC_14	Miao et al.(PMID 29301960)	59	Male	PR	Renal Clear Cell Carcinoma	Anti-PD-1/PD-L1	34.1667	0	2	0
RCC_15	Miao et al.(PMID 29301960)	73	Female	SD	Renal Clear Cell Carcinoma	Anti-PD-1/PD-L1	33.7667	1	1.96667	0
RCC_18	Miao et al.(PMID 29301960)	68	Male	PD	Renal Clear Cell Carcinoma	Anti-PD-1/PD-L1	3.7	0	2	0
RCC_20	Miao et al.(PMID 29301960)	76	Male	CR	Renal Clear Cell Carcinoma	Anti-PD-1/PD-L1	35.5	0	2.6	0
RCC_21	Miao et al.(PMID 29301960)	64	Male	SD	Renal Clear Cell Carcinoma	Anti-PD-1/PD-L1	11.6333	0	1.46667	0
RCC_25	Miao et al.(PMID 29301960)	72	Female	PD	Renal Clear Cell Carcinoma	Anti-PD-1/PD-L1	5.56667	1	3.23333	0
RCC_27	Miao et al.(PMID 29301960)	59	Male	PD	Renal Clear Cell Carcinoma	Anti-PD-1/PD-L1	32.2667	0	3.63333	0
RCC_32	Miao et al.(PMID 29301960)	65	Male	SD	Renal Clear Cell Carcinoma	Anti-PD-1/PD-L1	8	1	5.36667	0
RCC_39	Miao et al.(PMID 29301960)	72	Male	PD	Renal Clear Cell Carcinoma	Anti-PD-1/PD-L1	10.2	1	1.93333	0
RCC_41	Miao et al.(PMID 29301960)	66	Male	PD	Renal Clear Cell Carcinoma	Anti-PD-1/PD-L1	6.5	0	2.03333	0
RCC_50	Miao et al.(PMID 29301960)	63	Female	SD	Renal Clear Cell Carcinoma	Anti-PD-1/PD-L1	32.7333	0	2.03333	0
RCC_52	Miao et al.(PMID 29301960)	63	Female	SD	Renal Clear Cell Carcinoma	Anti-PD-1/PD-L1	33.1667	0	2.83333	0
RCC_56	Miao et al.(PMID 29301960)	62	Female	SD	Renal Clear Cell Carcinoma	Anti-PD-1/PD-L1	33.0667	0	2.93333	0
RCC_58	Miao et al.(PMID 29301960)	55	Female	PR	Renal Clear Cell Carcinoma	Anti-PD-1/PD-L1	32.9333	0	3.33333	0
RCC_62	Miao et al.(PMID 29301960)	48	Female	SD	Renal Clear Cell Carcinoma	Anti-PD-1/PD-L1	3.53333	0	3.36667	0
RCC_68	Miao et al.(PMID 29301960)	69	Male	PD	Renal Clear Cell Carcinoma	Anti-PD-1/PD-L1	24.6667	1	2.43333	0
RCC_73	Miao et al.(PMID 29301960)	77	Male	PD	Renal Clear Cell Carcinoma	Anti-PD-1/PD-L1	5.93333	1	1.9	0
RCC_79	Miao et al.(PMID 29301960)	61	Female	SD	Renal Clear Cell Carcinoma	Anti-PD-1/PD-L1	29.1	0	4.13333	0
RCC_84	Miao et al.(PMID 29301960)	55	Female	SD	Renal Clear Cell Carcinoma	Anti-PD-1/PD-L1	22.6667	1	2.76667	0
RCC_85	Miao et al.(PMID 29301960)	36	Male	SD	Renal Clear Cell Carcinoma	Anti-PD-1/PD-L1	23.7333	1	1.76667	0
RCC_90	Miao et al.(PMID 29301960)	54	Male	PD	Renal Clear Cell Carcinoma	Anti-PD-1/PD-L1	16.6333	1	2.8	0
RCC_93	Miao et al.(PMID 29301960)	64	Male	PR	Renal Clear Cell Carcinoma	Anti-PD-1/PD-L1	22.8	1	2.43333	0
RCC_96	Miao et al.(PMID 29301960)	75	Female	PD	Renal Clear Cell Carcinoma	Anti-PD-1/PD-L1	19.4	0	3.13333	0
RCC_97	Miao et al.(PMID 29301960)	54	Male	PD	Renal Clear Cell Carcinoma	Anti-PD-1/PD-L1	29.0333	0	1.96667	0
RCC_99	Miao et al.(PMID 29301960)	50	Male	PD	Renal Clear Cell Carcinoma	Anti-PD-1/PD-L1	1.36667	1	3.4	0
AL4602	Miao et al.(PMID 30150660)	59	MALE	SD	Lung	Anti-PD-1/PD-L1	8.39	0		0
AU5884	Miao et al.(PMID 30150660)	64	MALE	PD	Lung	Anti-PD-1/PD-L1	1.78	0		0
BL3403	Miao et al.(PMID 30150660)	73	FEMALE	SD	Lung	Anti-PD-1/PD-L1	6.48	0		0
BLADDER-15330_CCPM_0700629	Miao et al.(PMID 30150660)	69	MALE	PR	Bladder	Anti-PD-1/PD-L1	3.49	0		0
BLADDER-15330_CCPM_0700691	Miao et al.(PMID 30150660)	57	MALE	SD	Bladder	Anti-PD-1/PD-L1	5.72	1		0
BLADDER-15330_CCPM_0700692	Miao et al.(PMID 30150660)	68	MALE	SD	Bladder	Anti-PD-1/PD-L1	8.95	1		0
BLADDER-15330_CCPM_0700694	Miao et al.(PMID 30150660)	60	MALE	PR	Bladder	Anti-PD-1/PD-L1	9.44	0		1
BLCA_immunotherapy_responder-DFCI_11-104_011	Miao et al.(PMID 30150660)	NA	MALE	PD	Bladder	Anti-PD-1/PD-L1	3.16	1		0
BLCA-001	Miao et al.(PMID 30150660)	NA	MALE	SD	Bladder	Anti-PD-1/PD-L1	16.71	0		0
BLCA-002	Miao et al.(PMID 30150660)	NA	MALE	PD	Bladder	Anti-PD-1/PD-L1	2.43	1		1
BLCA-003	Miao et al.(PMID 30150660)	NA	MALE	PR	Bladder	Anti-PD-1/PD-L1	16.55	0		0
BLCA-005	Miao et al.(PMID 30150660)	NA	FEMALE	PR	Bladder	Anti-PD-1/PD-L1	12.11	1		0
BLCA-006	Miao et al.(PMID 30150660)	NA	MALE	CR	Bladder	anti-CTLA-4 + anti-PD-1/PD-L1	13.03	0		0
BLCA-007	Miao et al.(PMID 30150660)	NA	FEMALE	PD	Bladder	Anti-PD-1/PD-L1	3.45	1		0
BLCA-008	Miao et al.(PMID 30150660)	NA	FEMALE	PD	Bladder	Anti-PD-1/PD-L1	4.67	1		0
BLCA-009	Miao et al.(PMID 30150660)	NA	MALE	PR	Bladder	Anti-PD-1/PD-L1	16.12	0		1
BLCA-010	Miao et al.(PMID 30150660)	NA	MALE	PD	Bladder	Anti-PD-1/PD-L1	5.56	1		1
BLCA-011	Miao et al.(PMID 30150660)	NA	MALE	PR	Bladder	Anti-PD-1/PD-L1	16.58	0		0
BLCA-012	Miao et al.(PMID 30150660)	NA	MALE	PD	Bladder	Anti-PD-1/PD-L1	11.84	0		0
BLCA-014	Miao et al.(PMID 30150660)	NA	FEMALE	PD	Bladder	Anti-PD-1/PD-L1	3.13	1		0
BLCA-015	Miao et al.(PMID 30150660)	NA	MALE	PR	Bladder	Anti-PD-1/PD-L1	24.47	0		1
BLCA-016	Miao et al.(PMID 30150660)	NA	FEMALE	PD	Bladder	Anti-PD-1/PD-L1	7.01	1		0
CA9903	Miao et al.(PMID 30150660)	57	MALE	SD	Lung	Anti-PD-1/PD-L1	6.41	1		0
CANSEQU01-0100425	Miao et al.(PMID 30150660)	NA	FEMALE	PD	Lung	Anti-PD-1/PD-L1	24.01	0		0
CR0095	Miao et al.(PMID 30150660)	NA	MALE	PR	Melanoma	anti-CTLA-4	16.32	0		0
CR04885	Miao et al.(PMID 30150660)	NA	FEMALE	PR	Melanoma	anti-CTLA-4	21.81	1		1
CR06670	Miao et al.(PMID 30150660)	NA	FEMALE	CR	Melanoma	anti-CTLA-4	15.39	1		0
CR1509	Miao et al.(PMID 30150660)	NA	FEMALE	PR	Melanoma	anti-CTLA-4	13.52	1		0
CR22640	Miao et al.(PMID 30150660)	NA	MALE	PD	Melanoma	anti-CTLA-4	4.7	1		0
CR3665	Miao et al.(PMID 30150660)	NA	MALE	PR	Melanoma	anti-CTLA-4	14.51	0		0
CR6126	Miao et al.(PMID 30150660)	NA	FEMALE	PR	Melanoma	anti-CTLA-4	24.18	0		0
CR6161	Miao et al.(PMID 30150660)	NA	MALE	CR	Melanoma	anti-CTLA-4	68.44	0		1
CR9306	Miao et al.(PMID 30150660)	NA	MALE	CR	Melanoma	anti-CTLA-4	25.21	0		1
CR9699	Miao et al.(PMID 30150660)	NA	MALE	CR	Melanoma	anti-CTLA-4	44.42	1		0
CU9061	Miao et al.(PMID 30150660)	57	MALE	CR	Lung	Anti-PD-1/PD-L1	54.03	0		0
DFCI_MM_1	Miao et al.(PMID 30150660)	NA	FEMALE	CR	Melanoma	Anti-PD-1/PD-L1	51.63	0		0
DFCI_MM_2	Miao et al.(PMID 30150660)	NA	FEMALE	CR	Melanoma	Anti-PD-1/PD-L1	32.42	0		0
DFCI-11-104	Miao et al.(PMID 30150660)	57	MALE	CR	Lung	Anti-PD-1/PD-L1	23.26	0		0
DI6359	Miao et al.(PMID 30150660)	61	FEMALE	CR	Lung	Anti-PD-1/PD-L1	31.32	1		0
DM123062	Miao et al.(PMID 30150660)	50	MALE	CR	Lung	Anti-PD-1/PD-L1	63.63	0		0
FR9547	Miao et al.(PMID 30150660)	65	FEMALE	CR	Lung	Anti-PD-1/PD-L1	52.83	0		0
GR4788	Miao et al.(PMID 30150660)	59	MALE	SD	Lung	Anti-PD-1/PD-L1	3.98	0		0
HE3202	Miao et al.(PMID 30150660)	63	FEMALE	CR	Lung	Anti-PD-1/PD-L1	44.34	0		0
HNSCC-186	Miao et al.(PMID 30150660)	NA	MALE	CR	HNSCC	Anti-PD-1/PD-L1	19.74	0		0
HNSCC-215	Miao et al.(PMID 30150660)	NA	MALE	CR	HNSCC	Anti-PD-1/PD-L1	12.01	0		0
HNSCC-238	Miao et al.(PMID 30150660)	NA	MALE	PR	HNSCC	Anti-PD-1/PD-L1	9.8	0		0
HNSCC-239	Miao et al.(PMID 30150660)	NA	MALE	PD	HNSCC	Anti-PD-1/PD-L1	1.88	0		0
HNSCC-243	Miao et al.(PMID 30150660)	NA	MALE	PR	HNSCC	anti-CTLA-4 + anti-PD-1/PD-L1	4.18	0		0
HNSCC-258	Miao et al.(PMID 30150660)	NA	MALE	PD	HNSCC	Anti-PD-1/PD-L1	1.88	0		0
HNSCC-266	Miao et al.(PMID 30150660)	NA	FEMALE	PR	HNSCC	Anti-PD-1/PD-L1	14.7	0		0
HNSCC-287	Miao et al.(PMID 30150660)	NA	MALE	SD	HNSCC	anti-CTLA-4 + anti-PD-1/PD-L1	20.39	1		0
HNSCC-296	Miao et al.(PMID 30150660)	NA	MALE	PD	HNSCC	Anti-PD-1/PD-L1	8.75	1		1
HNSCC-305	Miao et al.(PMID 30150660)	NA	MALE	PR	HNSCC	anti-CTLA-4 + anti-PD-1/PD-L1	15.13	0		0
HNSCC-306	Miao et al.(PMID 30150660)	NA	MALE	SD	HNSCC	anti-CTLA-4 + anti-PD-1/PD-L1	13.22	1		0
HNSCC-323	Miao et al.(PMID 30150660)	NA	MALE	PD	HNSCC	Anti-PD-1/PD-L1	3.72	0		0
IM_01	Miao et al.(PMID 30150660)	67	MALE	SD	Bladder	Anti-PD-1/PD-L1	12.43	0		0
IM_04	Miao et al.(PMID 30150660)	55	FEMALE	PD	Bladder	Anti-PD-1/PD-L1	1.97	1		0
IM_06	Miao et al.(PMID 30150660)	58	FEMALE	PD	Bladder	Anti-PD-1/PD-L1	2.34	1		0
IM_07	Miao et al.(PMID 30150660)	55	MALE	SD	Bladder	Anti-PD-1/PD-L1	1.51	1		0
IM_09	Miao et al.(PMID 30150660)	74	FEMALE	SD	Bladder	Anti-PD-1/PD-L1	4.9	0		0
IM_10	Miao et al.(PMID 30150660)	72	MALE	PD	Bladder	Anti-PD-1/PD-L1	5.56	0		0
IM_11	Miao et al.(PMID 30150660)	68	MALE	PR	Bladder	Anti-PD-1/PD-L1	4.61	0		0
IM_12	Miao et al.(PMID 30150660)	79	MALE	PD	Bladder	Anti-PD-1/PD-L1	3.29	0		0
JB112852	Miao et al.(PMID 30150660)	60	MALE	SD	Lung	Anti-PD-1/PD-L1	8.09	0		0
KA3947	Miao et al.(PMID 30150660)	64	FEMALE	SD	Lung	Anti-PD-1/PD-L1	3.49	0		0
LO3793	Miao et al.(PMID 30150660)	62	FEMALE	SD	Lung	Anti-PD-1/PD-L1	6.28	0		0
LO5004	Miao et al.(PMID 30150660)	56	FEMALE	SD	Lung	Anti-PD-1/PD-L1	32.42	0		0
LSD0167	Miao et al.(PMID 30150660)	NA	MALE	SD	Melanoma	anti-CTLA-4	39.62	0		0
LSD2057	Miao et al.(PMID 30150660)	NA	FEMALE	SD	Melanoma	anti-CTLA-4	35.46	0		0
LSD3484	Miao et al.(PMID 30150660)	NA	MALE	SD	Melanoma	anti-CTLA-4	25.21	0		0
LSD4744	Miao et al.(PMID 30150660)	NA	MALE	SD	Melanoma	anti-CTLA-4	40.82	0		1
LSD6819	Miao et al.(PMID 30150660)	NA	MALE	PR	Melanoma	anti-CTLA-4	7.99	1		0
LUNG-2630	Miao et al.(PMID 30150660)	NA	MALE	SD	Lung	Anti-PD-1/PD-L1	4.47	1		0
M4945	Miao et al.(PMID 30150660)	66	MALE	SD	Lung	Anti-PD-1/PD-L1	3.91	1		0
MA7027	Miao et al.(PMID 30150660)	56	MALE	SD	Lung	Anti-PD-1/PD-L1	3.91	1		0
MEL-582186	Miao et al.(PMID 30150660)	NA	FEMALE	SD	Melanoma	anti-CTLA-4 + anti-PD-1/PD-L1	58.59	0		0
MEL-587761	Miao et al.(PMID 30150660)	NA	MALE	PR	Melanoma	anti-CTLA-4 + anti-PD-1/PD-L1	13.59	1		0
MEL-650366	Miao et al.(PMID 30150660)	NA	FEMALE	SD	Melanoma	anti-CTLA-4 + anti-PD-1/PD-L1	10.72	1		0
MEL-682321	Miao et al.(PMID 30150660)	NA	FEMALE	SD	Melanoma	anti-CTLA-4 + anti-PD-1/PD-L1	6.74	1		0
NI9507	Miao et al.(PMID 30150660)	41	FEMALE	PR	Lung	Anti-PD-1/PD-L1	32.86	0		0
NR1867	Miao et al.(PMID 30150660)	NA	MALE	SD	Melanoma	anti-CTLA-4	12.63	1		1
NR2137	Miao et al.(PMID 30150660)	NA	MALE	SD	Melanoma	anti-CTLA-4	5.79	1		1
NR3549	Miao et al.(PMID 30150660)	NA	MALE	PD	Melanoma	anti-CTLA-4	24.9	0		0
NR4018	Miao et al.(PMID 30150660)	NA	MALE	SD	Melanoma	anti-CTLA-4	26.91	1		0
NR4045	Miao et al.(PMID 30150660)	NA	MALE	SD	Melanoma	anti-CTLA-4	15.53	1		0
NR4083	Miao et al.(PMID 30150660)	NA	MALE	CR	Melanoma	anti-CTLA-4	21.71	0		1
NR4631	Miao et al.(PMID 30150660)	NA	MALE	PR	Melanoma	anti-CTLA-4	14.61	0		1
NR4810	Miao et al.(PMID 30150660)	NA	FEMALE	PD	Melanoma	anti-CTLA-4	1.78	0		0
NR4949	Miao et al.(PMID 30150660)	NA	FEMALE	PR	Melanoma	anti-CTLA-4	13.65	0		0
NR8815	Miao et al.(PMID 30150660)	NA	FEMALE	SD	Melanoma	anti-CTLA-4	19.21	0		0
NR9445	Miao et al.(PMID 30150660)	NA	MALE	PD	Melanoma	anti-CTLA-4	26.12	0		0
NR9449	Miao et al.(PMID 30150660)	NA	FEMALE	PR	Melanoma	anti-CTLA-4	14.7	0		0
NR9521	Miao et al.(PMID 30150660)	NA	MALE	SD	Melanoma	anti-CTLA-4	53.68	0		1
NR9705	Miao et al.(PMID 30150660)	NA	FEMALE	PD	Melanoma	anti-CTLA-4	3.29	1		0
NR9765	Miao et al.(PMID 30150660)	NA	FEMALE	PR	Melanoma	anti-CTLA-4	32.47	0		0
Pat02	Miao et al.(PMID 30150660)	42	FEMALE	PD	Melanoma	anti-CTLA-4	5.3	1		0
Pat03	Miao et al.(PMID 30150660)	61	FEMALE	SD	Melanoma	anti-CTLA-4	34.54	0		0
Pat04	Miao et al.(PMID 30150660)	71	MALE	PD	Melanoma	anti-CTLA-4	4.61	1		0
Pat06	Miao et al.(PMID 30150660)	33	MALE	PD	Melanoma	anti-CTLA-4	11.84	1		0
Pat07	Miao et al.(PMID 30150660)	35	MALE	PD	Melanoma	anti-CTLA-4	9.47	1		0
Pat08	Miao et al.(PMID 30150660)	73	MALE	PR	Melanoma	anti-CTLA-4	34.47	1		0
Pat100	Miao et al.(PMID 30150660)	71	MALE	SD	Melanoma	anti-CTLA-4	7.8	1		0
Pat101	Miao et al.(PMID 30150660)	75	MALE	PR	Melanoma	anti-CTLA-4	34.44	0		0
Pat103	Miao et al.(PMID 30150660)	70	MALE	PD	Melanoma	anti-CTLA-4	8.22	1		1
Pat104	Miao et al.(PMID 30150660)	45	FEMALE	PD	Melanoma	anti-CTLA-4	25.99	0		0
Pat105	Miao et al.(PMID 30150660)	41	MALE	PD	Melanoma	anti-CTLA-4	10.53	1		0
Pat106	Miao et al.(PMID 30150660)	43	FEMALE	PD	Melanoma	anti-CTLA-4	20.33	1		0
Pat11	Miao et al.(PMID 30150660)	67	MALE	PR	Melanoma	anti-CTLA-4	9.9	1		1
Pat110	Miao et al.(PMID 30150660)	76	MALE	PD	Melanoma	anti-CTLA-4	4.77	1		1
Pat111	Miao et al.(PMID 30150660)	84	MALE	PR	Melanoma	anti-CTLA-4	30.07	0		0
Pat113	Miao et al.(PMID 30150660)	68	MALE	PD	Melanoma	anti-CTLA-4	10.3	1		0
Pat115	Miao et al.(PMID 30150660)	46	MALE	PD	Melanoma	anti-CTLA-4	26.58	0		0
Pat117	Miao et al.(PMID 30150660)	74	MALE	PD	Melanoma	anti-CTLA-4	9.54	1		0
Pat118	Miao et al.(PMID 30150660)	43	FEMALE	PD	Melanoma	anti-CTLA-4	4.01	1		0
Pat119	Miao et al.(PMID 30150660)	61	MALE	SD	Melanoma	anti-CTLA-4	28.06	1		0
Pat12	Miao et al.(PMID 30150660)	41	MALE	PD	Melanoma	anti-CTLA-4	4.8	1		0
Pat121	Miao et al.(PMID 30150660)	47	MALE	PR	Melanoma	anti-CTLA-4	21.09	0		0
Pat123	Miao et al.(PMID 30150660)	49	FEMALE	PD	Melanoma	anti-CTLA-4	10.92	1		0
Pat124	Miao et al.(PMID 30150660)	78	MALE	PD	Melanoma	anti-CTLA-4	3.72	1		0
Pat126	Miao et al.(PMID 30150660)	77	MALE	PD	Melanoma	anti-CTLA-4	17.73	0		0
Pat127	Miao et al.(PMID 30150660)	24	FEMALE	PD	Melanoma	anti-CTLA-4	24.08	1		0
Pat128	Miao et al.(PMID 30150660)	30	MALE	PR	Melanoma	anti-CTLA-4	22.24	0		0
Pat129	Miao et al.(PMID 30150660)	18	MALE	PD	Melanoma	anti-CTLA-4	17.83	1		0
Pat13	Miao et al.(PMID 30150660)	78	MALE	PD	Melanoma	anti-CTLA-4	9.93	1		0
Pat132	Miao et al.(PMID 30150660)	81	MALE	PD	Melanoma	anti-CTLA-4	2.66	1		1
Pat133	Miao et al.(PMID 30150660)	75	MALE	SD	Melanoma	anti-CTLA-4	48.62	1		0
Pat134	Miao et al.(PMID 30150660)	73	MALE	PD	Melanoma	anti-CTLA-4	3.26	1		0
Pat135	Miao et al.(PMID 30150660)	29	FEMALE	PD	Melanoma	anti-CTLA-4	5.36	1		0
Pat138	Miao et al.(PMID 30150660)	39	FEMALE	PD	Melanoma	anti-CTLA-4	16.18	1		1
Pat139	Miao et al.(PMID 30150660)	58	MALE	PD	Melanoma	anti-CTLA-4	5.03	1		1
Pat14	Miao et al.(PMID 30150660)	47	FEMALE	PR	Melanoma	anti-CTLA-4	28.62	1		0
Pat140	Miao et al.(PMID 30150660)	62	MALE	PD	Melanoma	anti-CTLA-4	7.37	1		0
Pat143	Miao et al.(PMID 30150660)	71	MALE	PD	Melanoma	anti-CTLA-4	2.76	1		0
Pat144	Miao et al.(PMID 30150660)	65	MALE	PD	Melanoma	anti-CTLA-4	1.64	1		0
Pat147	Miao et al.(PMID 30150660)	63	MALE	PD	Melanoma	anti-CTLA-4	6.71	1		0
Pat148	Miao et al.(PMID 30150660)	36	FEMALE	NA	Melanoma	anti-CTLA-4	2.83	1		0
Pat15	Miao et al.(PMID 30150660)	32	MALE	PD	Melanoma	anti-CTLA-4	27.7	0		0
Pat151	Miao et al.(PMID 30150660)	68	MALE	PD	Melanoma	anti-CTLA-4	26.68	1		1
Pat157	Miao et al.(PMID 30150660)	69	FEMALE	PD	Melanoma	anti-CTLA-4	5	1		0
Pat159	Miao et al.(PMID 30150660)	52	MALE	PD	Melanoma	anti-CTLA-4	6.94	1		1
Pat16	Miao et al.(PMID 30150660)	68	FEMALE	PD	Melanoma	anti-CTLA-4	24.64	0		0
Pat160	Miao et al.(PMID 30150660)	79	MALE	NA	Melanoma	anti-CTLA-4	2.53	1		0
Pat162	Miao et al.(PMID 30150660)	55	FEMALE	PD	Melanoma	anti-CTLA-4	13.42	1		0
Pat163	Miao et al.(PMID 30150660)	54	MALE	NA	Melanoma	anti-CTLA-4	2.2	1		0
Pat166	Miao et al.(PMID 30150660)	31	MALE	PD	Melanoma	anti-CTLA-4	6.74	1		0
Pat167	Miao et al.(PMID 30150660)	50	MALE	PD	Melanoma	anti-CTLA-4	3.55	1		0
Pat168	Miao et al.(PMID 30150660)	69	MALE	PD	Melanoma	anti-CTLA-4	15.33	1		0
Pat17	Miao et al.(PMID 30150660)	44	MALE	PR	Melanoma	anti-CTLA-4	22.63	0		0
Pat170	Miao et al.(PMID 30150660)	48	MALE	NA	Melanoma	anti-CTLA-4	2.96	1		0
Pat171	Miao et al.(PMID 30150660)	66	MALE	PD	Melanoma	anti-CTLA-4	37.3	0		0
Pat174	Miao et al.(PMID 30150660)	57	FEMALE	SD	Melanoma	anti-CTLA-4	22.24	1		0
Pat175	Miao et al.(PMID 30150660)	66	FEMALE	PR	Melanoma	anti-CTLA-4	31.94	0		0
Pat18	Miao et al.(PMID 30150660)	55	FEMALE	PD	Melanoma	anti-CTLA-4	45.36	0		0
Pat21	Miao et al.(PMID 30150660)	81	MALE	PD	Melanoma	anti-CTLA-4	4.84	1		0
Pat24	Miao et al.(PMID 30150660)	74	FEMALE	CR	Melanoma	anti-CTLA-4	48.91	0		0
[truncated: 939 more rows]
